# Supplementary material for: New technologies promoting active upper limb rehabilitation after stroke: an overview and network meta-analysis
Source: PubMed Central journal article supplement — Eur J Phys Rehabil Med. 2022 Jun 6;58(4):530–48. doi: 10.23736/S1973-9087.22.07404-4 (PMC9980549; doi:10.23736/s1973-9087.22.07404-4), 2022-06-06

SUPPLEMENTARY DIGITAL MATERIAL 4

Supplementary Table II.—4.1. RAT effect on motor function during subacute phase.

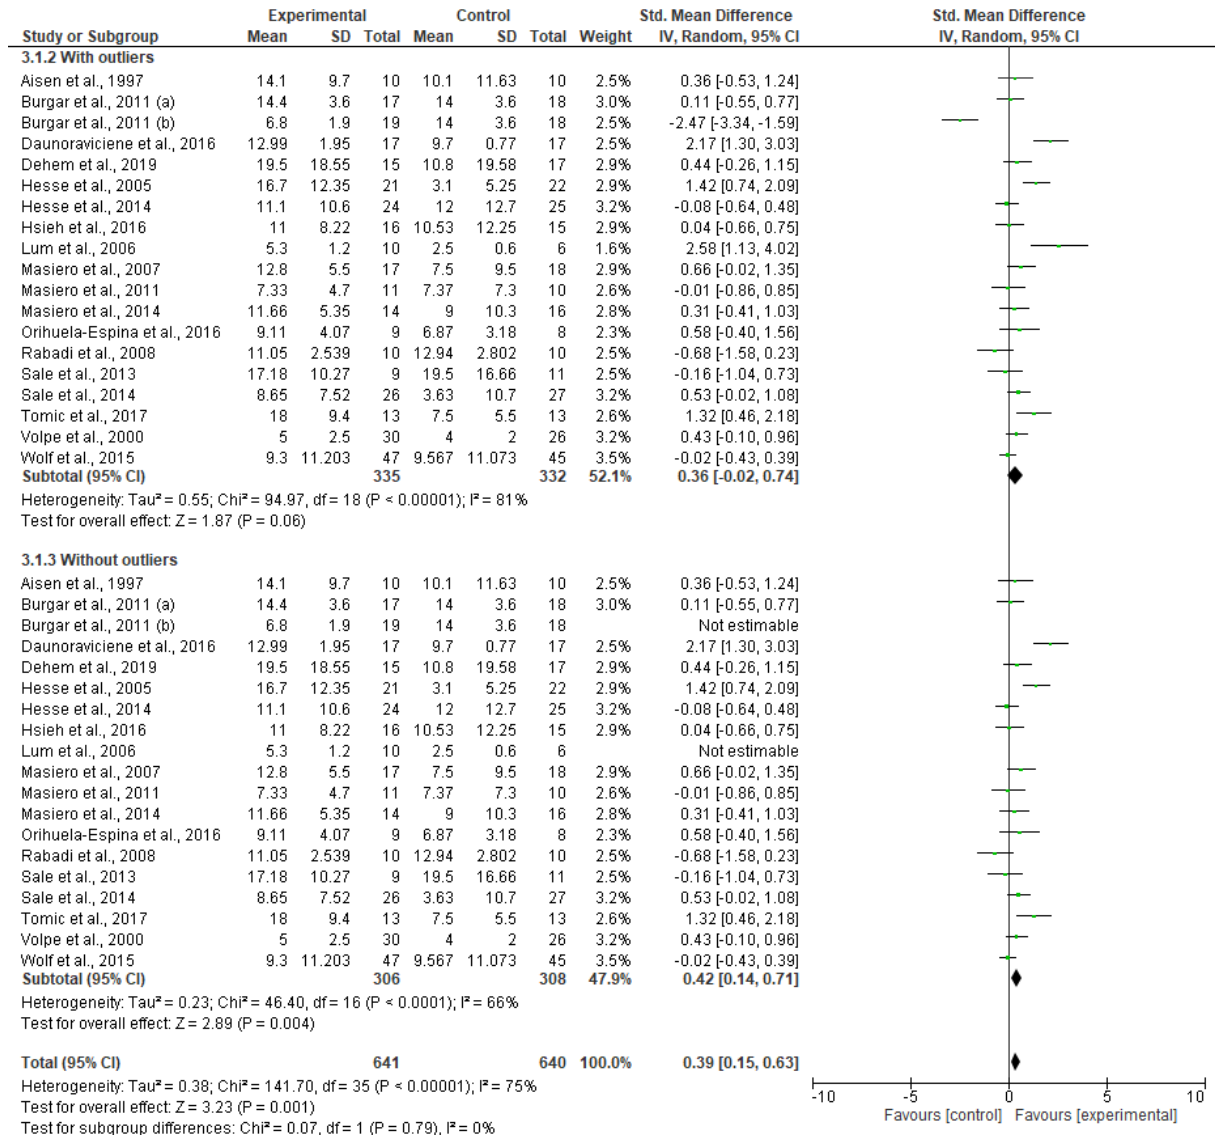

Supplementary Figure 1.—Distribution.

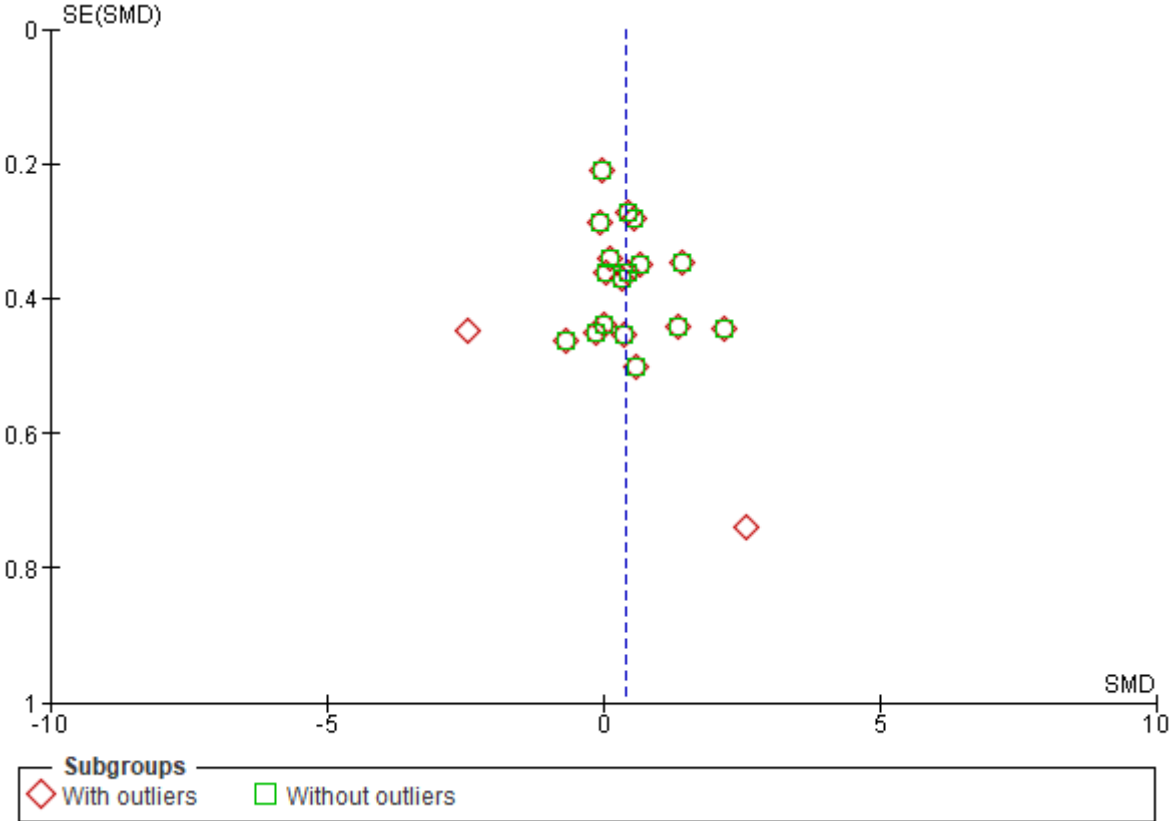

Supplementary Table III.—RAT effect on motor function during chronic phase.

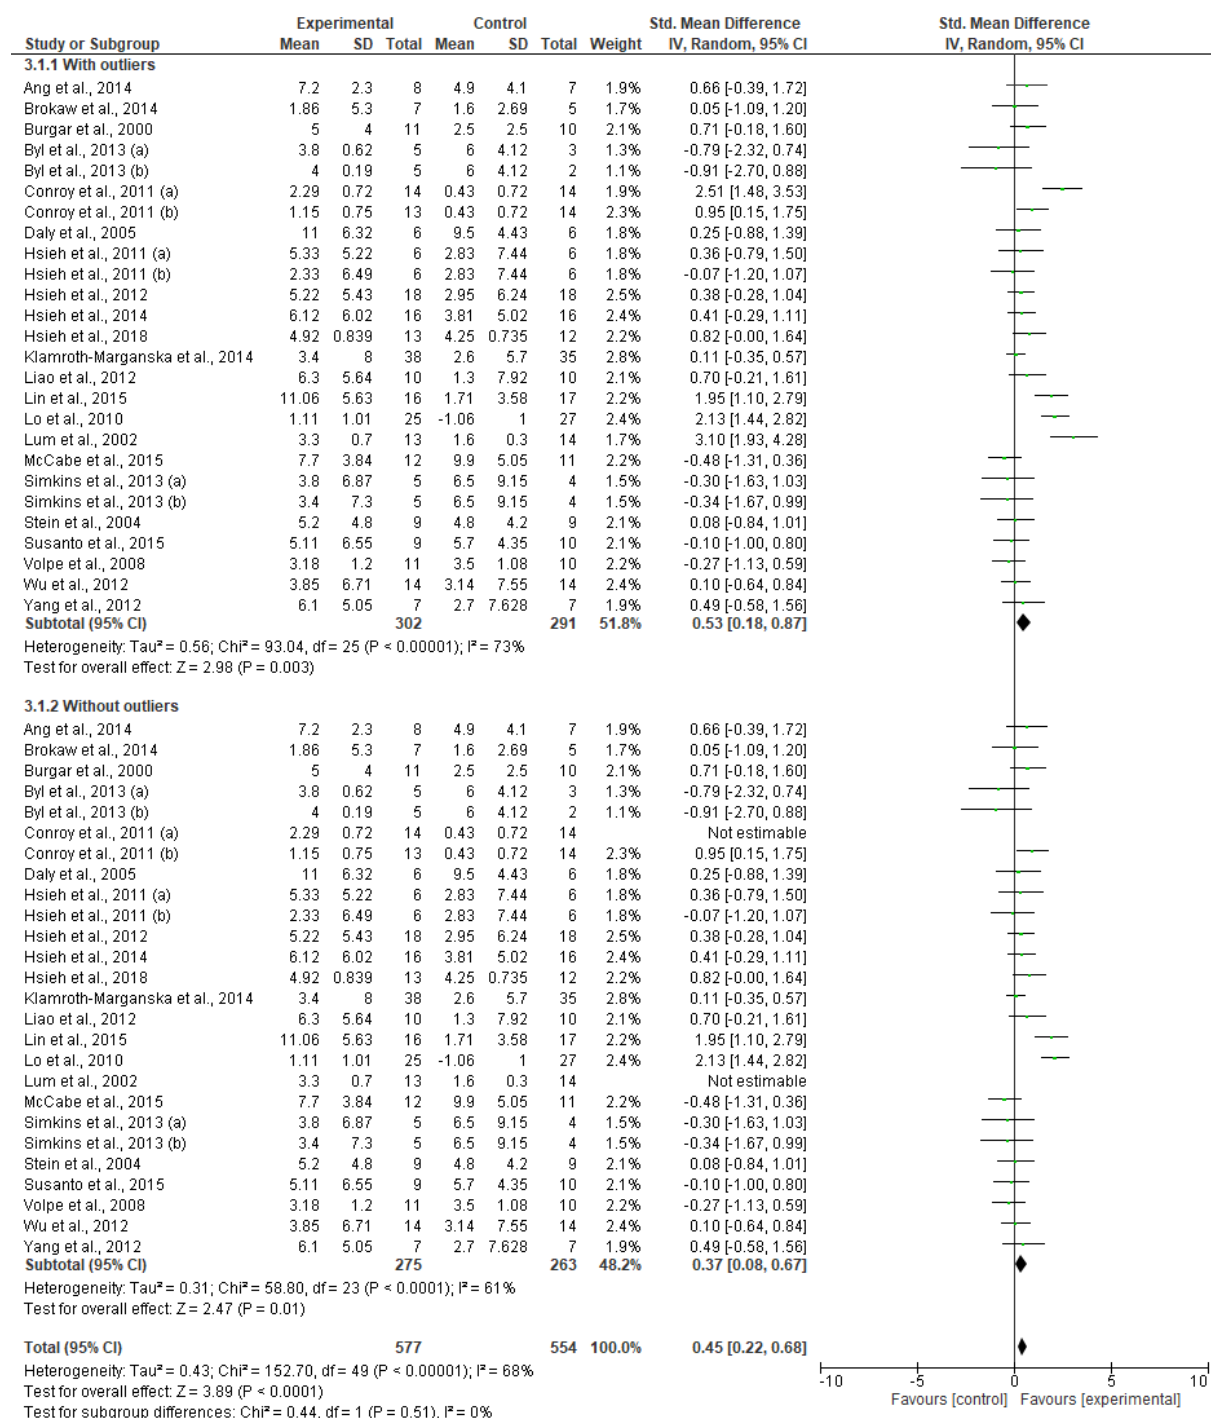

Supplementary Figure 2.—Distribution.

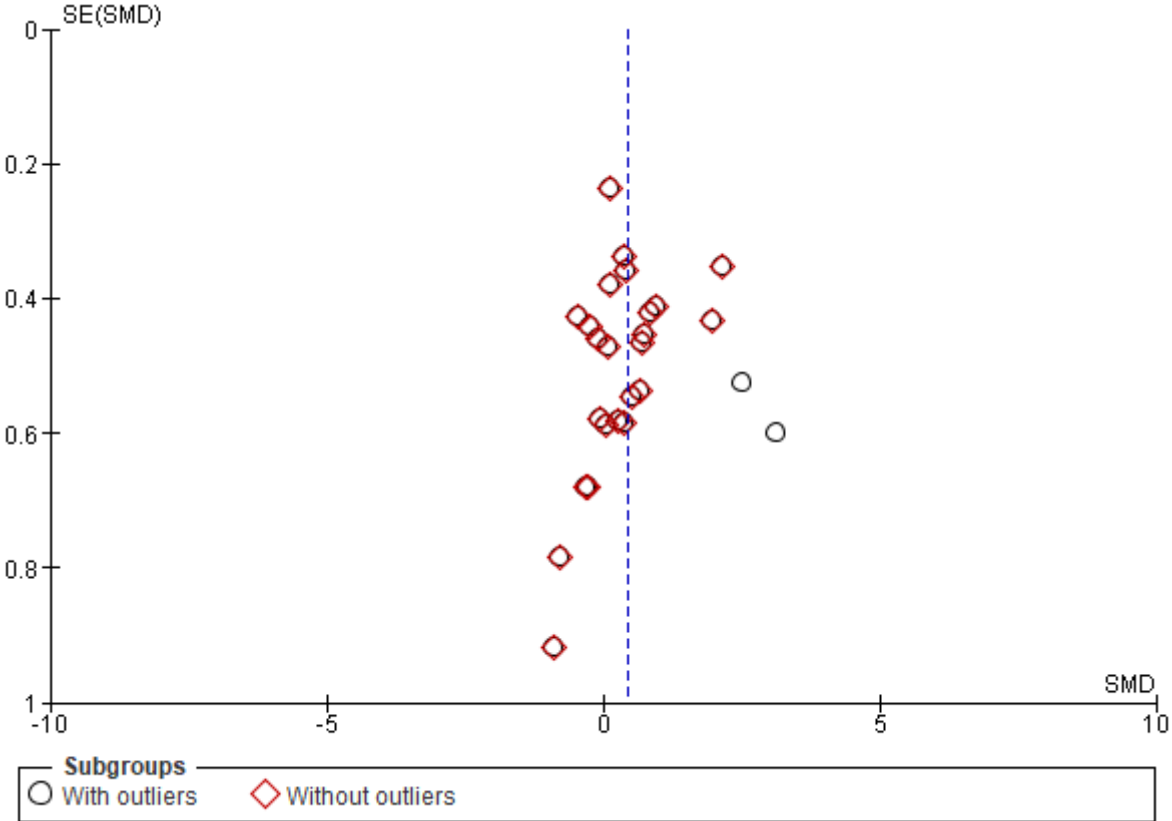

Supplementary Table IV.—VR effect on motor function during chronic phase.

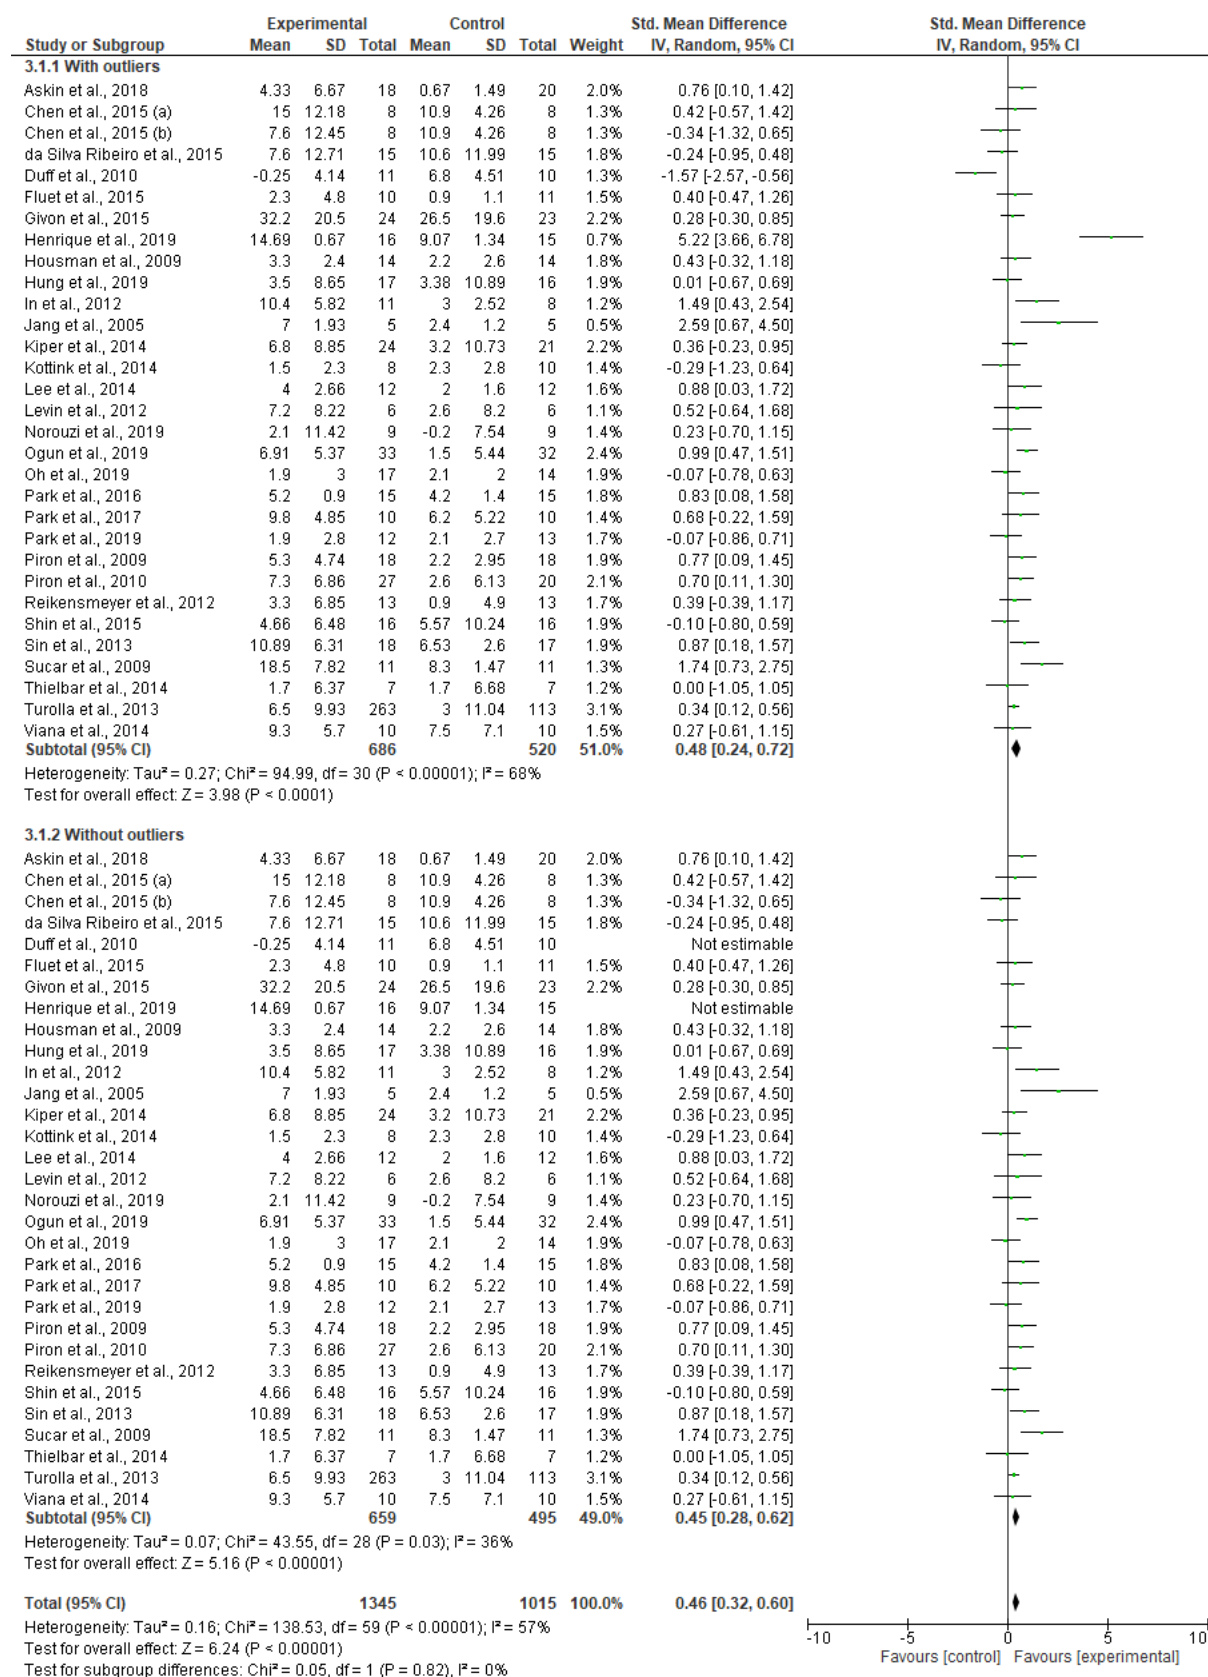

Supplementary Figure 3.—Distribution.

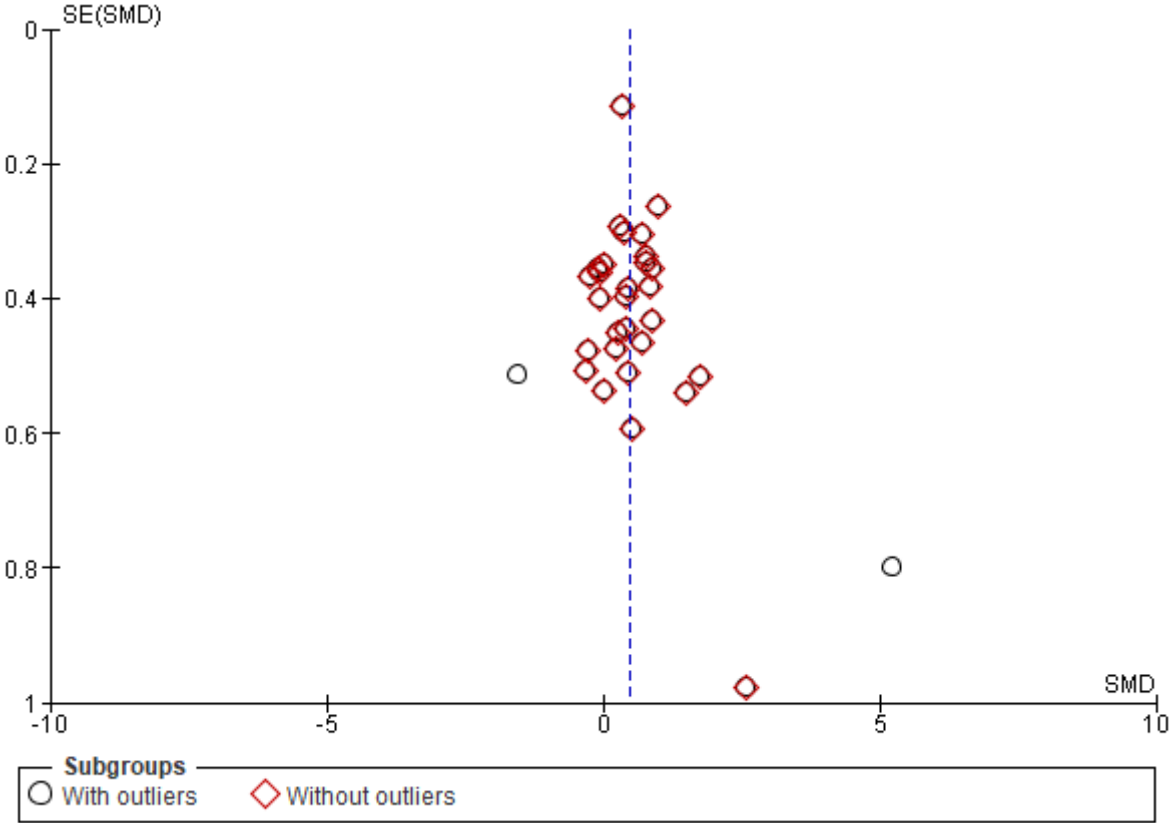

Supplementary Table V.—TR effect on activity during subacute phase.

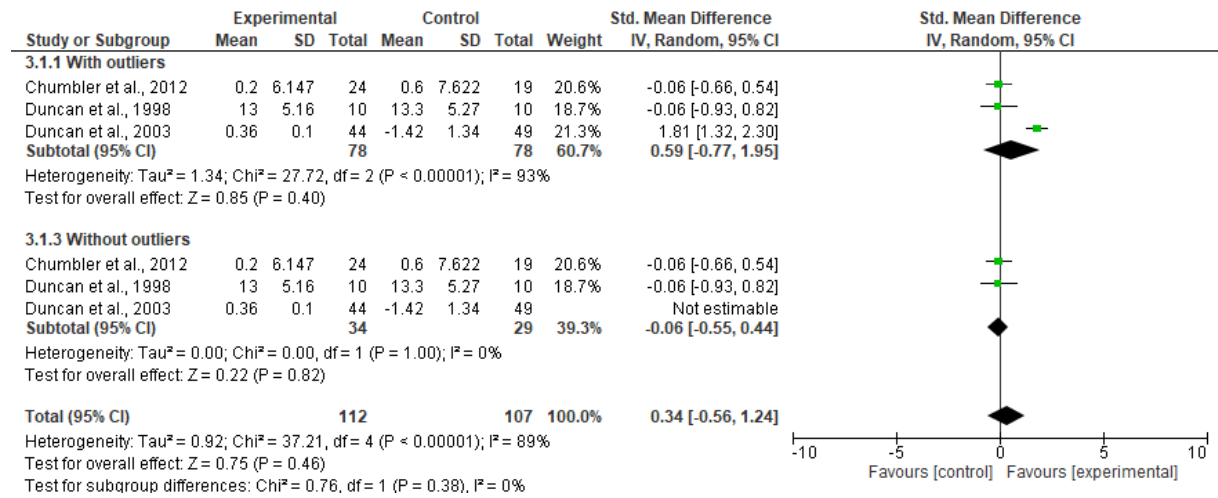

Supplementary Figure 4.—Distribution.

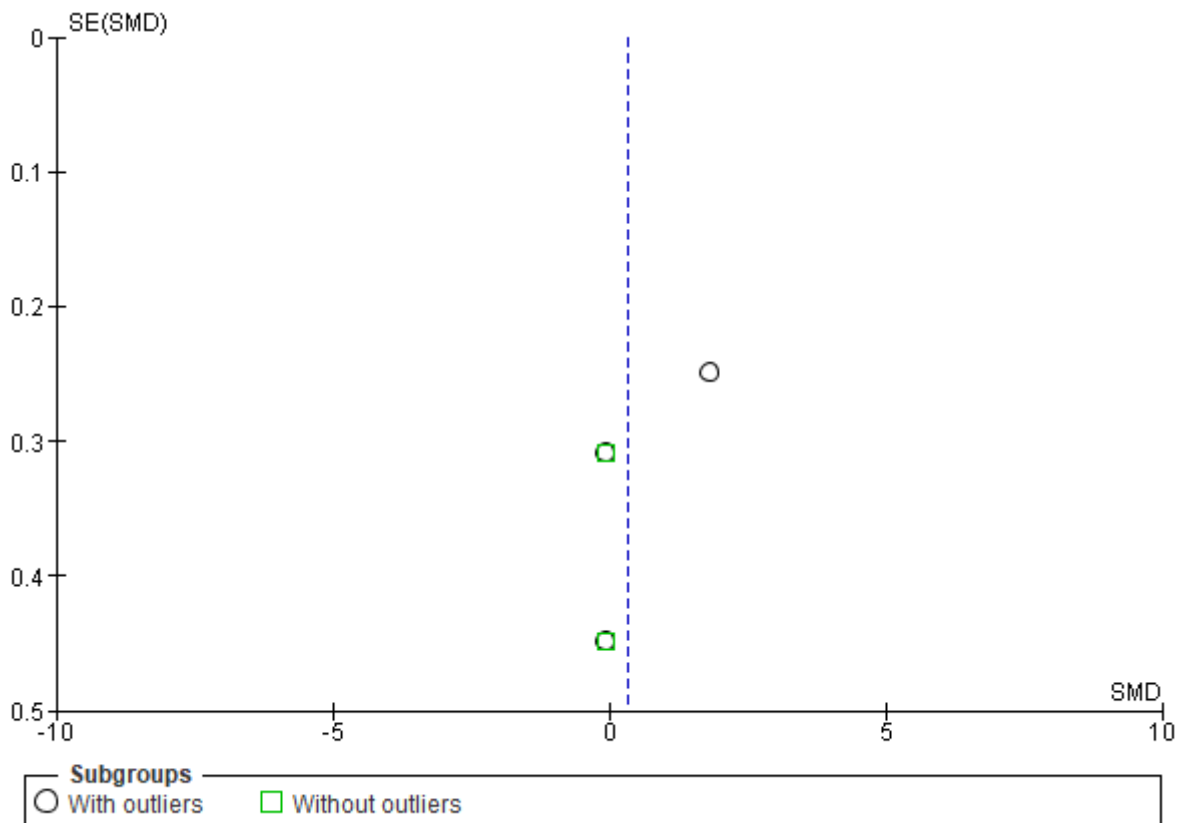

Supplementary Table VI.—RAT effect on activity during chronic phase.

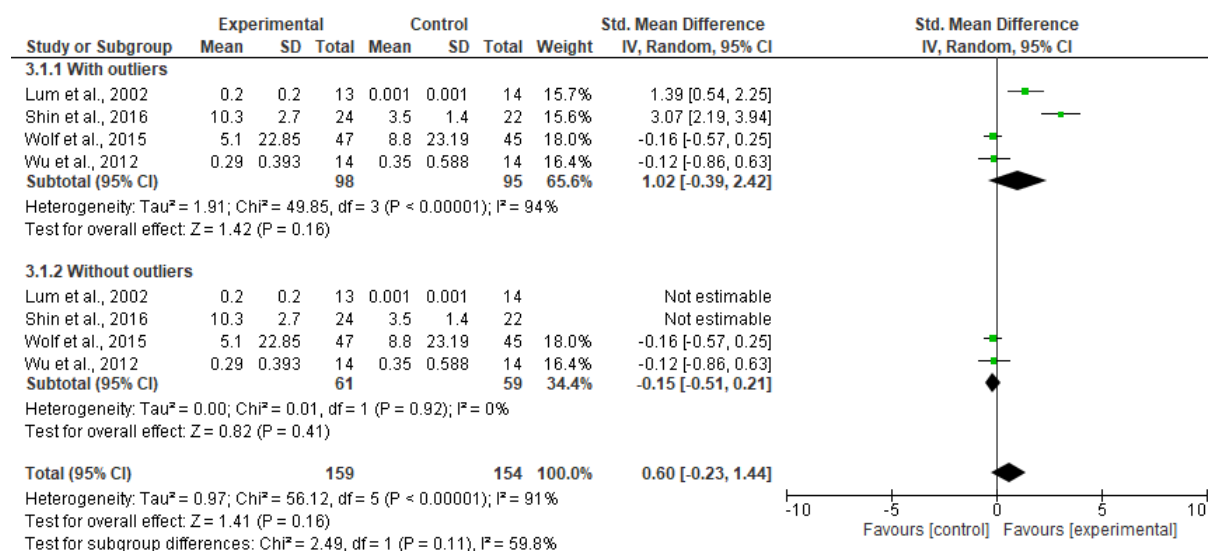

Supplementary Figure 5.—Distribution.

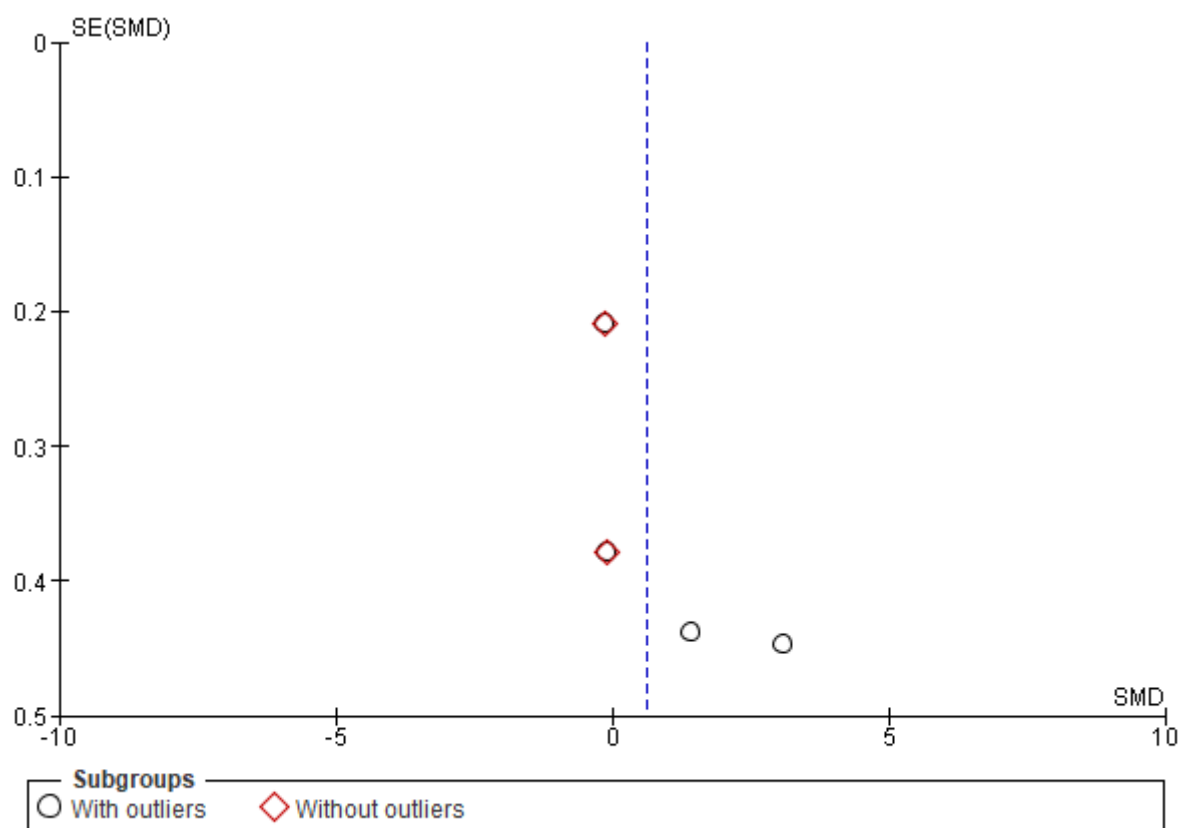



Supplementary Table VII.—VR effect on activity during chronic phase.

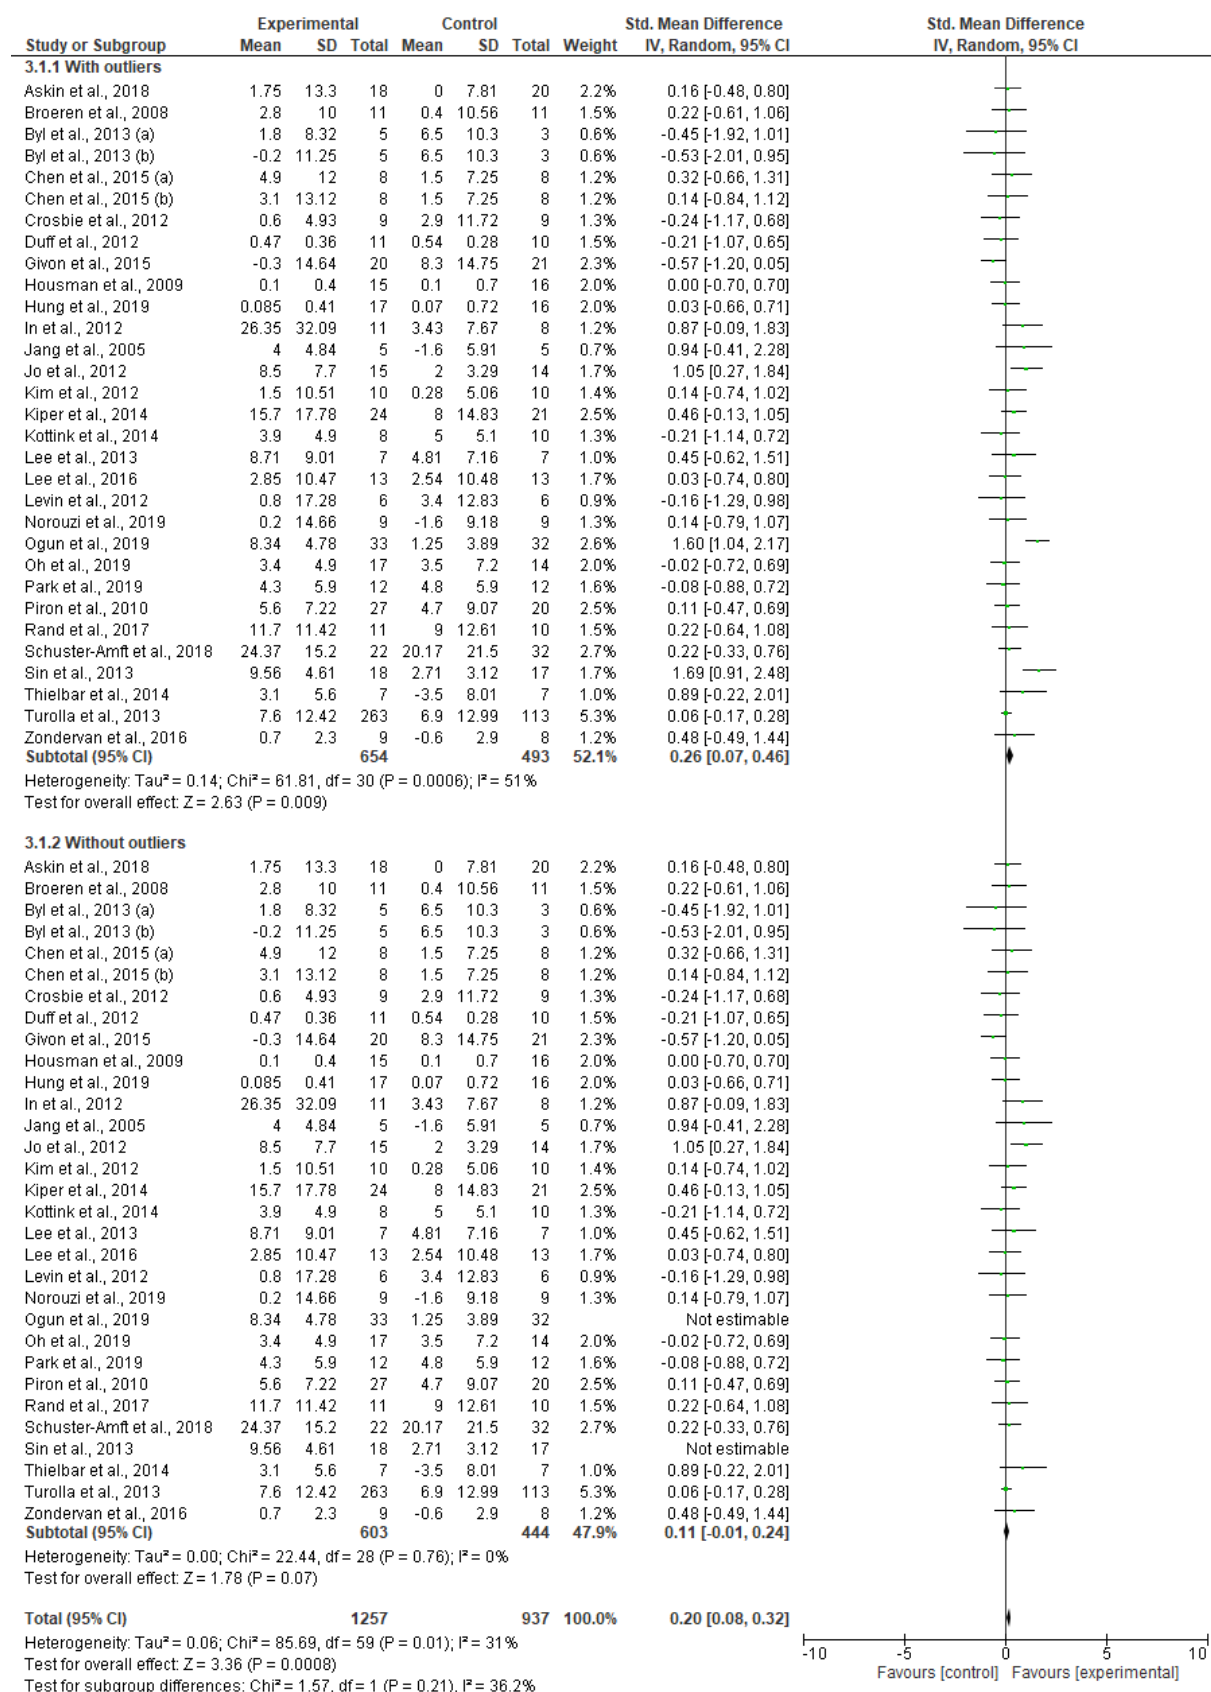

Supplementary Figure 6.—Distribution.

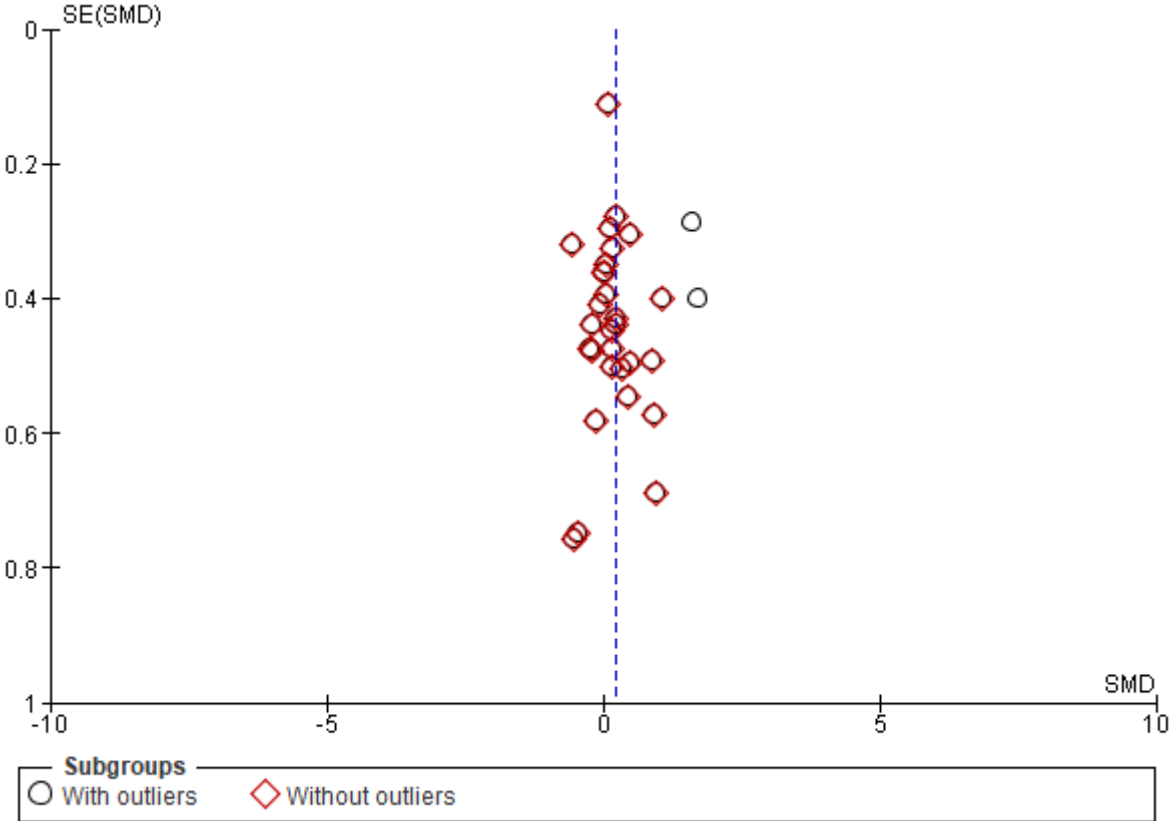

Supplementary Table VIII.—New technologies effects on motor function when provided in addition (all studies vs only time-matches interventions).

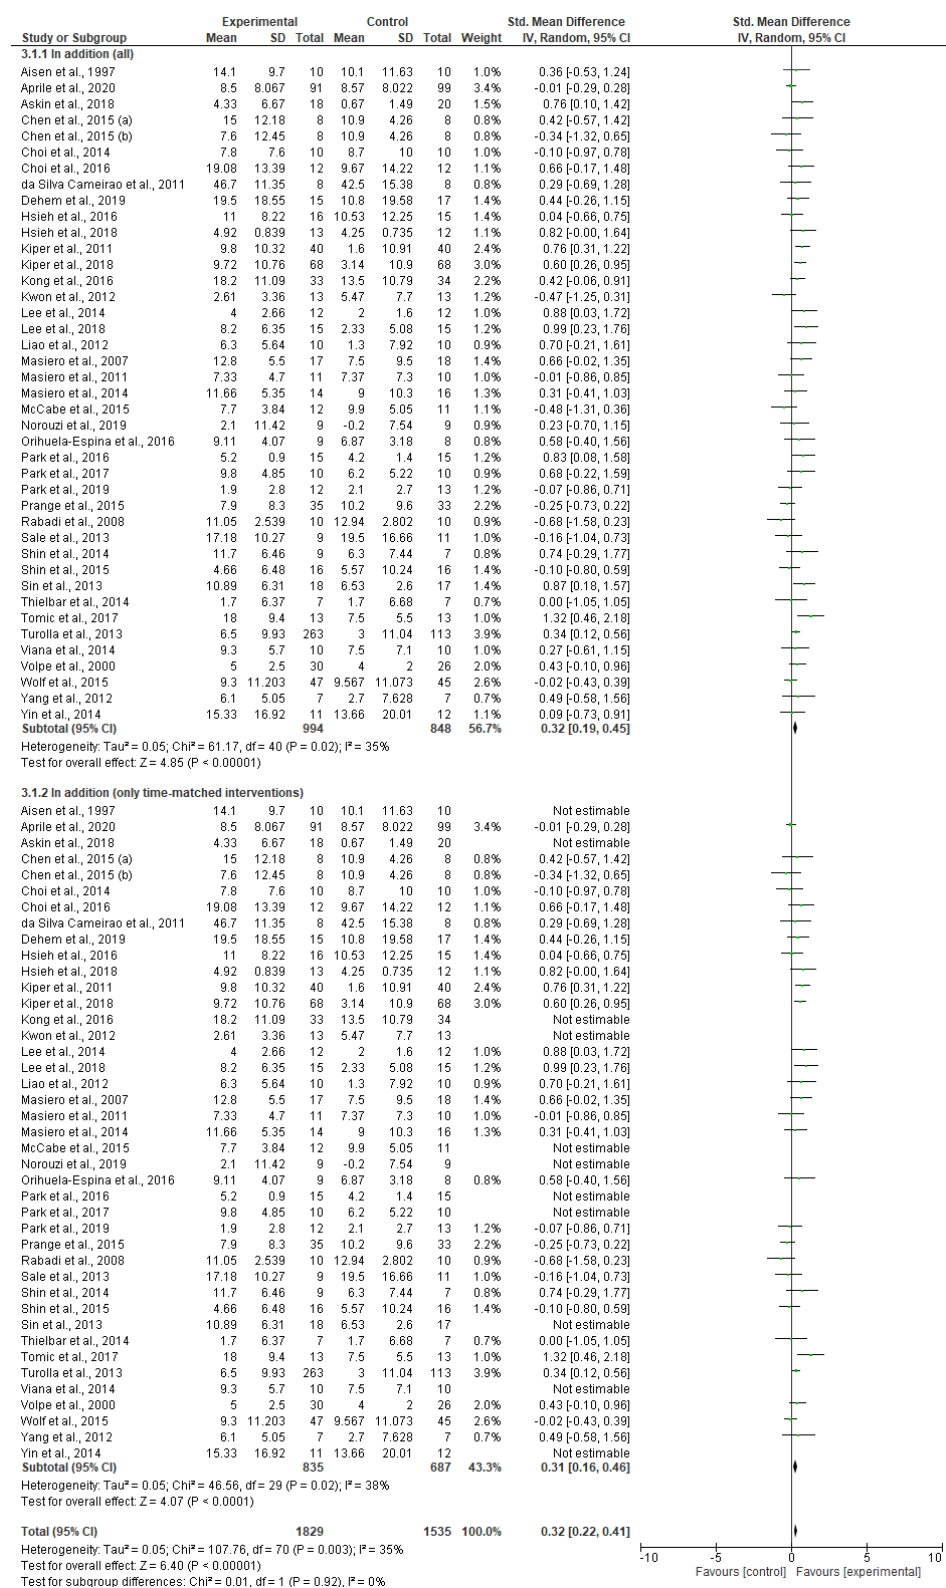

# Supplementary Table IX.—New technologies effects on motor function when provided in substitution (all studies vs only time-matches interventions).

| Study or Subgroup                                                                                              | Experimental |       |       | Control |       |       | Weight | Std. Mean Difference<br>IV, Random, 95% CI | Std. Mean Difference<br>IV, Random, 95% CI |
|----------------------------------------------------------------------------------------------------------------|--------------|-------|-------|---------|-------|-------|--------|--------------------------------------------|--------------------------------------------|
|                                                                                                                | Mean         | SD    | Total | Mean    | SD    | Total |        |                                            |                                            |
| <b>3.2.1 In substitution (all)</b>                                                                             |              |       |       |         |       |       |        |                                            |                                            |
| Ang et al., 2014                                                                                               | 7.2          | 2.3   | 8     | 4.9     | 4.1   | 7     | 0.9%   | 0.66 [-0.39, 1.72]                         |                                            |
| Brokaw et al., 2014                                                                                            | 1.86         | 5.3   | 7     | 1.6     | 2.69  | 5     | 0.8%   | 0.05 [-1.09, 1.20]                         |                                            |
| Burgar et al., 2000                                                                                            | 5            | 4     | 11    | 2.5     | 2.5   | 10    | 1.0%   | 0.71 [-0.16, 1.60]                         |                                            |
| Burgar et al., 2011 (a)                                                                                        | 14.4         | 3.6   | 17    | 14      | 3.6   | 18    | 1.4%   | 0.11 [-0.55, 0.77]                         |                                            |
| Burgar et al., 2011 (b)                                                                                        | 6.8          | 1.9   | 19    | 14      | 3.6   | 18    |        | Not estimable                              |                                            |
| Byt et al., 2013 (a)                                                                                           | 3.8          | 0.62  | 5     | 6       | 4.12  | 3     | 0.5%   | -0.79 [-2.32, 0.74]                        |                                            |
| Byt et al., 2013 (b)                                                                                           | 4            | 0.19  | 5     | 6       | 4.12  | 2     | 0.4%   | -0.91 [-2.70, 0.88]                        |                                            |
| Conroy et al., 2011 (a)                                                                                        | 2.29         | 0.72  | 14    | 0.43    | 0.72  | 14    |        | Not estimable                              |                                            |
| Conroy et al., 2011 (b)                                                                                        | 1.15         | 0.75  | 13    | 0.43    | 0.72  | 14    | 1.2%   | 0.95 [0.15, 1.75]                          |                                            |
| Cramer et al., 2019                                                                                            | 7.86         | 6.68  | 62    | 8.36    | 7.04  | 62    | 1.9%   | -0.07 [-0.42, 0.28]                        |                                            |
| Daly et al., 2005                                                                                              | 11           | 6.32  | 6     | 9.5     | 4.43  | 6     | 0.8%   | 0.25 [-0.88, 1.39]                         |                                            |
| da Silva Ribeiro et al., 2015                                                                                  | 7.6          | 12.71 | 15    | 10.6    | 11.99 | 15    | 1.3%   | -0.24 [-0.95, 0.48]                        |                                            |
| Daunoraviciene et al., 2016                                                                                    | 12.99        | 1.95  | 17    | 9.7     | 0.77  | 17    | 1.1%   | 2.17 [1.30, 3.03]                          |                                            |
| De Araujo et al., 2011                                                                                         | 9.67         | 4.69  | 6     | 10.83   | 8.73  | 6     | 0.8%   | -0.15 [-1.29, 0.98]                        |                                            |
| Duff et al., 2012                                                                                              | -0.25        | 4.14  | 11    | 6.8     | 4.51  | 10    |        | Not estimable                              |                                            |
| Duncan et al., 1998                                                                                            | 8.4          | 10.97 | 10    | 2.2     | 11.21 | 10    | 1.0%   | 0.54 [-0.36, 1.43]                         |                                            |
| Duncan et al., 2003                                                                                            | 4.48         | 0.81  | 44    | 4.04    | 0.9   | 48    | 1.8%   | 0.51 [0.09, 0.92]                          |                                            |
| Fluet et al., 2015                                                                                             | 2.3          | 4.8   | 10    | 0.9     | 1.1   | 11    | 1.1%   | 0.40 [-0.47, 1.26]                         |                                            |
| Galvao et al., 2015                                                                                            | 10.22        | 11.12 | 18    | 3.11    | 13.74 | 10    | 1.2%   | 0.57 [-0.22, 1.36]                         |                                            |
| Gwon et al., 2015                                                                                              | 32.2         | 20.5  | 24    | 26.5    | 19.6  | 23    | 1.5%   | 0.28 [-0.30, 0.85]                         |                                            |
| Henrique et al., 2019                                                                                          | 14.89        | 0.67  | 16    | 9.07    | 1.34  | 15    |        | Not estimable                              |                                            |
| Hesse et al., 2005                                                                                             | 16.7         | 12.35 | 21    | 3.1     | 5.25  | 22    | 1.3%   | 1.42 [0.74, 2.09]                          |                                            |
| Hesse et al., 2014                                                                                             | 11.1         | 10.6  | 24    | 12      | 12.7  | 25    | 1.5%   | -0.08 [-0.64, 0.48]                        |                                            |
| Housman et al., 2009                                                                                           | 3.3          | 2.4   | 14    | 2.2     | 2.6   | 14    | 1.2%   | 0.43 [-0.32, 1.18]                         |                                            |
| Hsieh et al., 2011 (a)                                                                                         | 5.33         | 5.22  | 6     | 2.83    | 7.44  | 6     | 0.8%   | 0.36 [-0.79, 1.50]                         |                                            |
| Hsieh et al., 2011 (b)                                                                                         | 2.33         | 6.49  | 6     | 2.83    | 7.44  | 6     | 0.8%   | -0.07 [-1.20, 1.07]                        |                                            |
| Hsieh et al., 2012                                                                                             | 5.22         | 5.43  | 18    | 2.95    | 6.24  | 18    | 1.4%   | 0.38 [-0.28, 1.04]                         |                                            |
| Hsieh et al., 2014                                                                                             | 6.12         | 6.02  | 16    | 3.81    | 5.02  | 16    | 1.3%   | 0.41 [-0.29, 1.11]                         |                                            |
| In et al., 2012                                                                                                | 10.4         | 5.82  | 11    | 3       | 2.52  | 8     | 0.9%   | 1.49 [0.43, 2.54]                          |                                            |
| Jang et al., 2005                                                                                              | 7            | 1.93  | 5     | 2.4     | 1.2   | 5     | 0.4%   | 2.59 [0.67, 4.50]                          |                                            |
| Kiper et al., 2014                                                                                             | 6.8          | 8.85  | 24    | 3.2     | 10.73 | 21    | 1.5%   | 0.36 [-0.23, 0.95]                         |                                            |
| Klamroth-Marganska et al., 2014                                                                                | 3.4          | 8     | 38    | 2.6     | 5.7   | 35    | 1.7%   | 0.11 [-0.35, 0.57]                         |                                            |
| Kotlink et al., 2014                                                                                           | 1.5          | 2.3   | 8     | 2.3     | 2.8   | 10    | 1.0%   | -0.29 [-1.23, 0.64]                        |                                            |
| Levin et al., 2012                                                                                             | 7.2          | 8.22  | 6     | 2.6     | 8.2   | 6     | 0.8%   | 0.52 [-0.64, 1.68]                         |                                            |
| Lin et al., 2015                                                                                               | 5.4          | 5.62  | 5     | 6.6     | 5.5   | 5     | 0.7%   | -0.19 [-1.44, 1.05]                        |                                            |
| Lo et al., 2010                                                                                                | 1.11         | 1.01  | 25    | -1.06   | 1     | 27    | 1.3%   | 2.13 [1.44, 2.82]                          |                                            |
| Lum et al., 2002                                                                                               | 3.3          | 0.7   | 13    | 1.6     | 0.3   | 14    |        | Not estimable                              |                                            |
| Lum et al., 2006                                                                                               | 5.3          | 1.2   | 10    | 2.5     | 0.6   | 6     |        | Not estimable                              |                                            |
| Nijenhuis et al., 2016                                                                                         | 0.3          | 19.02 | 9     | 2       | 16.63 | 10    | 1.0%   | -0.09 [-0.99, 0.81]                        |                                            |
| Ogun et al., 2019                                                                                              | 6.91         | 5.37  | 33    | 1.5     | 5.44  | 32    | 1.6%   | 0.99 [0.47, 1.51]                          |                                            |
| Oh et al., 2019                                                                                                | 1.9          | 3     | 17    | 2.1     | 2     | 14    | 1.3%   | -0.07 [-0.78, 0.63]                        |                                            |
| Piron et al., 2007                                                                                             | 7.7          | 5.9   | 25    | 3.4     | 7.4   | 13    | 1.3%   | 0.65 [-0.03, 1.34]                         |                                            |
| Piron et al., 2008                                                                                             | 5.4          | 5.62  | 5     | 6.6     | 5.5   | 5     | 0.7%   | -0.19 [-1.44, 1.05]                        |                                            |
| Piron et al., 2009                                                                                             | 5.3          | 4.74  | 18    | 2.2     | 2.95  | 18    | 1.3%   | 0.77 [0.09, 1.45]                          |                                            |
| Piron et al., 2010                                                                                             | 7.3          | 6.86  | 27    | 6.6     | 6.13  | 20    | 1.5%   | 0.70 [0.11, 1.30]                          |                                            |
| Reikensmeyer et al., 2012                                                                                      | 3.3          | 6.85  | 13    | 0.9     | 4.9   | 13    | 1.2%   | 0.39 [-0.39, 1.17]                         |                                            |
| Sale et al., 2014                                                                                              | 8.65         | 7.52  | 26    | 3.63    | 10.7  | 27    | 1.6%   | 0.53 [-0.02, 1.08]                         |                                            |
| Simkins et al., 2013 (a)                                                                                       | 3.8          | 6.87  | 5     | 6.5     | 9.15  | 4     | 0.6%   | -0.30 [-1.63, 1.03]                        |                                            |
| Simkins et al., 2013 (b)                                                                                       | 3.4          | 7.3   | 5     | 6.5     | 9.15  | 4     | 0.6%   | -0.34 [-1.67, 0.99]                        |                                            |
| Stein et al., 2004                                                                                             | 5.2          | 4.8   | 9     | 4.8     | 4.2   | 9     | 1.0%   | 0.08 [-0.84, 1.01]                         |                                            |
| Sucar et al., 2009                                                                                             | 18.5         | 7.82  | 11    | 8.3     | 1.47  | 11    | 0.9%   | 1.74 [0.73, 2.75]                          |                                            |
| Susanto et al., 2015                                                                                           | 5.11         | 6.55  | 9     | 5.7     | 4.35  | 10    | 1.0%   | -0.10 [-1.00, 0.80]                        |                                            |
| Volpe et al., 2008                                                                                             | 3.18         | 1.2   | 11    | 3.5     | 1.08  | 10    | 1.1%   | -0.27 [-1.13, 0.59]                        |                                            |
| Wu et al., 2012                                                                                                | 3.85         | 6.71  | 14    | 3.14    | 7.55  | 14    | 1.2%   | 0.10 [-0.64, 0.84]                         |                                            |
| Subtotal (95% CI)                                                                                              |              |       | 742   |         |       | 705   | 53.2%  | 0.42 [0.25, 0.60]                          |                                            |
| Heterogeneity: Tau <sup>2</sup> = 0.20; Chi <sup>2</sup> = 110.59, df = 47 (P < 0.00001); I <sup>2</sup> = 58% |              |       |       |         |       |       |        |                                            |                                            |
| Test for overall effect: Z = 4.76 (P < 0.00001)                                                                |              |       |       |         |       |       |        |                                            |                                            |
| <b>3.2.3 In substitution (only time matched interventions)</b>                                                 |              |       |       |         |       |       |        |                                            |                                            |
| Ang et al., 2014                                                                                               | 7.2          | 2.3   | 8     | 4.9     | 4.1   | 7     | 0.9%   | 0.66 [-0.39, 1.72]                         |                                            |
| Brokaw et al., 2014                                                                                            | 1.86         | 5.3   | 7     | 1.6     | 2.69  | 5     | 0.8%   | 0.05 [-1.09, 1.20]                         |                                            |
| Burgar et al., 2000                                                                                            | 5            | 4     | 11    | 2.5     | 2.5   | 10    |        | Not estimable                              |                                            |
| Burgar et al., 2011 (a)                                                                                        | 14.4         | 3.6   | 17    | 14      | 3.6   | 18    |        | Not estimable                              |                                            |
| Burgar et al., 2011 (b)                                                                                        | 6.8          | 1.9   | 19    | 14      | 3.6   | 18    |        | Not estimable                              |                                            |
| Byt et al., 2013 (a)                                                                                           | 3.8          | 0.62  | 5     | 6       | 4.12  | 3     | 0.5%   | -0.79 [-2.32, 0.74]                        |                                            |
| Byt et al., 2013 (b)                                                                                           | 4            | 0.19  | 5     | 6       | 4.12  | 2     | 0.4%   | -0.91 [-2.70, 0.88]                        |                                            |
| Conroy et al., 2011 (a)                                                                                        | 2.29         | 0.72  | 14    | 0.43    | 0.72  | 14    |        | Not estimable                              |                                            |
| Conroy et al., 2011 (b)                                                                                        | 1.15         | 0.75  | 13    | 0.43    | 0.72  | 14    | 1.2%   | 0.95 [0.15, 1.75]                          |                                            |
| Cramer et al., 2019                                                                                            | 7.86         | 6.68  | 62    | 8.36    | 7.04  | 62    | 1.9%   | -0.07 [-0.42, 0.28]                        |                                            |
| Daly et al., 2005                                                                                              | 11           | 6.32  | 6     | 9.5     | 4.43  | 6     | 0.8%   | 0.25 [-0.88, 1.39]                         |                                            |
| da Silva Ribeiro et al., 2015                                                                                  | 7.6          | 12.71 | 15    | 10.6    | 11.99 | 15    | 1.3%   | -0.24 [-0.95, 0.48]                        |                                            |
| Daunoraviciene et al., 2016                                                                                    | 12.99        | 1.95  | 17    | 9.7     | 0.77  | 17    | 1.1%   | 2.17 [1.30, 3.03]                          |                                            |
| De Araujo et al., 2011                                                                                         | 9.67         | 4.69  | 6     | 10.83   | 8.73  | 6     | 0.8%   | -0.15 [-1.29, 0.98]                        |                                            |
| Duff et al., 2012                                                                                              | -0.25        | 4.14  | 11    | 6.8     | 4.51  | 10    |        | Not estimable                              |                                            |
| Duncan et al., 1998                                                                                            | 8.4          | 10.97 | 10    | 2.2     | 11.21 | 10    |        | Not estimable                              |                                            |
| Duncan et al., 2003                                                                                            | 4.48         | 0.81  | 44    | 4.04    | 0.9   | 48    |        | Not estimable                              |                                            |
| Fluet et al., 2015                                                                                             | 2.3          | 4.8   | 10    | 0.9     | 1.1   | 11    | 1.1%   | 0.40 [-0.47, 1.26]                         |                                            |
| Galvao et al., 2015                                                                                            | 10.22        | 11.12 | 18    | 3.11    | 13.74 | 10    | 1.2%   | 0.57 [-0.22, 1.36]                         |                                            |
| Gwon et al., 2015                                                                                              | 32.2         | 20.5  | 24    | 26.5    | 19.6  | 23    | 1.5%   | 0.28 [-0.30, 0.85]                         |                                            |
| Henrique et al., 2019                                                                                          | 14.89        | 0.67  | 16    | 9.07    | 1.34  | 15    |        | Not estimable                              |                                            |
| Hesse et al., 2005                                                                                             | 16.7         | 12.35 | 21    | 3.1     | 5.25  | 22    | 1.3%   | 1.42 [0.74, 2.09]                          |                                            |
| Hesse et al., 2014                                                                                             | 11.1         | 10.6  | 24    | 12      | 12.7  | 25    | 1.5%   | -0.08 [-0.64, 0.48]                        |                                            |
| Housman et al., 2009                                                                                           | 3.3          | 2.4   | 14    | 2.2     | 2.6   | 14    | 1.2%   | 0.43 [-0.32, 1.18]                         |                                            |
| Hsieh et al., 2011 (a)                                                                                         | 5.33         | 5.22  | 6     | 2.83    | 7.44  | 6     | 0.8%   | 0.36 [-0.79, 1.50]                         |                                            |
| Hsieh et al., 2011 (b)                                                                                         | 2.33         | 6.49  | 6     | 2.83    | 7.44  | 6     | 0.8%   | -0.07 [-1.20, 1.07]                        |                                            |
| Hsieh et al., 2012                                                                                             | 5.22         | 5.43  | 18    | 2.95    | 6.24  | 18    | 1.4%   | 0.38 [-0.28, 1.04]                         |                                            |
| Hsieh et al., 2014                                                                                             | 6.12         | 6.02  | 16    | 3.81    | 5.02  | 16    | 1.3%   | 0.41 [-0.29, 1.11]                         |                                            |
| In et al., 2012                                                                                                | 10.4         | 5.82  | 11    | 3       | 2.52  | 8     | 0.9%   | 1.49 [0.43, 2.54]                          |                                            |
| Jang et al., 2005                                                                                              | 7            | 1.93  | 5     | 2.4     | 1.2   | 5     | 0.4%   | 2.59 [0.67, 4.50]                          |                                            |
| Kiper et al., 2014                                                                                             | 6.8          | 8.85  | 24    | 3.2     | 10.73 | 21    | 1.5%   | 0.36 [-0.23, 0.95]                         |                                            |
| Klamroth-Marganska et al., 2014                                                                                | 3.4          | 8     | 38    | 2.6     | 5.7   | 35    | 1.7%   | 0.11 [-0.35, 0.57]                         |                                            |
| Kotlink et al., 2014                                                                                           | 1.5          | 2.3   | 8     | 2.3     | 2.8   | 10    | 1.0%   | -0.29 [-1.23, 0.64]                        |                                            |
| Levin et al., 2012                                                                                             | 7.2          | 8.22  | 6     | 2.6     | 8.2   | 6     | 0.8%   | 0.52 [-0.64, 1.68]                         |                                            |
| Lin et al., 2015                                                                                               | 5.4          | 5.62  | 5     | 6.6     | 5.5   | 5     | 0.7%   | -0.19 [-1.44, 1.05]                        |                                            |
| Lo et al., 2010                                                                                                | 1.11         | 1.01  | 25    | -1.06   | 1     | 27    | 1.3%   | 2.13 [1.44, 2.82]                          |                                            |
| Lum et al., 2002                                                                                               | 3.3          | 0.7   | 13    | 1.6     | 0.3   | 14    |        | Not estimable                              |                                            |
| Lum et al., 2006                                                                                               | 5.3          | 1.2   | 10    | 2.5     | 0.6   | 6     |        | Not estimable                              |                                            |
| Nijenhuis et al., 2016                                                                                         | 0.3          | 19.02 | 9     | 2       | 16.63 | 10    | 1.0%   | -0.09 [-0.99, 0.81]                        |                                            |
| Ogun et al., 2019                                                                                              | 6.91         | 5.37  | 33    | 1.5     | 5.44  | 32    | 1.6%   | 0.99 [0.47, 1.51]                          |                                            |
| Oh et al., 2019                                                                                                | 1.9          | 3     | 17    | 2.1     | 2     | 14    | 1.3%   | -0.07 [-0.78, 0.63]                        |                                            |
| Piron et al., 2007                                                                                             | 7.7          | 5.9   | 25    | 3.4     | 7.4   | 13    | 1.3%   | 0.65 [-0.03, 1.34]                         |                                            |
| Piron et al., 2008                                                                                             | 5.4          | 5.62  | 5     | 6.6     | 5.5   | 5     | 0.7%   | -0.19 [-1.44, 1.05]                        |                                            |
| Piron et al., 2009                                                                                             | 5.3          | 4.74  | 18    | 2.2     | 2.95  | 18    | 1.3%   | 0.77 [0.09, 1.45]                          |                                            |
| Piron et al., 2010                                                                                             | 7.3          | 6.86  | 27    | 6.6     | 6.13  | 20    | 1.5%   | 0.70 [0.11, 1.30]                          |                                            |
| Reikensmeyer et al., 2012                                                                                      | 3.3          | 6.85  | 13    | 0.9     | 4.9   | 13    | 1.2%   | 0.39 [-0.39, 1.17]                         |                                            |
| Sale et al., 2014                                                                                              | 8.65         | 7.52  | 26    | 3.63    | 10.7  | 27    | 1.6%   | 0.53 [-0.02, 1.08]                         |                                            |
| Simkins et al., 2013 (a)                                                                                       | 3.8          | 6.87  | 5     | 6.5     | 9.15  | 4     | 0.6%   | -0.30 [-1.63, 1.03]                        |                                            |
| Simkins et al., 2013 (b)                                                                                       | 3.4          | 7.3   | 5     | 6.5     | 9.15  | 4     | 0.6%   | -0.34 [-1.67, 0.99]                        |                                            |
| Stein et al., 2004                                                                                             | 5.2          | 4.8   | 9     | 4.8     | 4.2   | 9     | 1.0%   | 0.08 [-0.84, 1.01]                         |                                            |
| Sucar et al., 2009                                                                                             | 18.5         | 7.82  | 11    | 8.3     | 1.47  | 11    | 0.9%   | 1.74 [0.73, 2.75]                          |                                            |
| Susanto et al., 2015                                                                                           | 5.11         | 6.55  | 9     | 5.7     | 4.35  | 10    | 1.0%   | -0.10 [-1.00, 0.80]                        |                                            |
| Volpe et al., 2008                                                                                             | 3.18         | 1.2   | 11    | 3.5     | 1.08  | 10    | 1.1%   | -0.27 [-1.13, 0.59]                        |                                            |
| Wu et al., 2012                                                                                                | 3.85         | 6.71  | 14    | 3.14    | 7.55  | 14    | 1.2%   | 0.10 [-0.64, 0.84]                         |                                            |
| Subtotal (95% CI)                                                                                              |              |       | 643   |         |       | 602   | 46.8%  | 0.38 [                                     |                                            |

Supplementary Table X.—New technologies effects on activity when provided in addition (all studies vs only time-matches interventions).

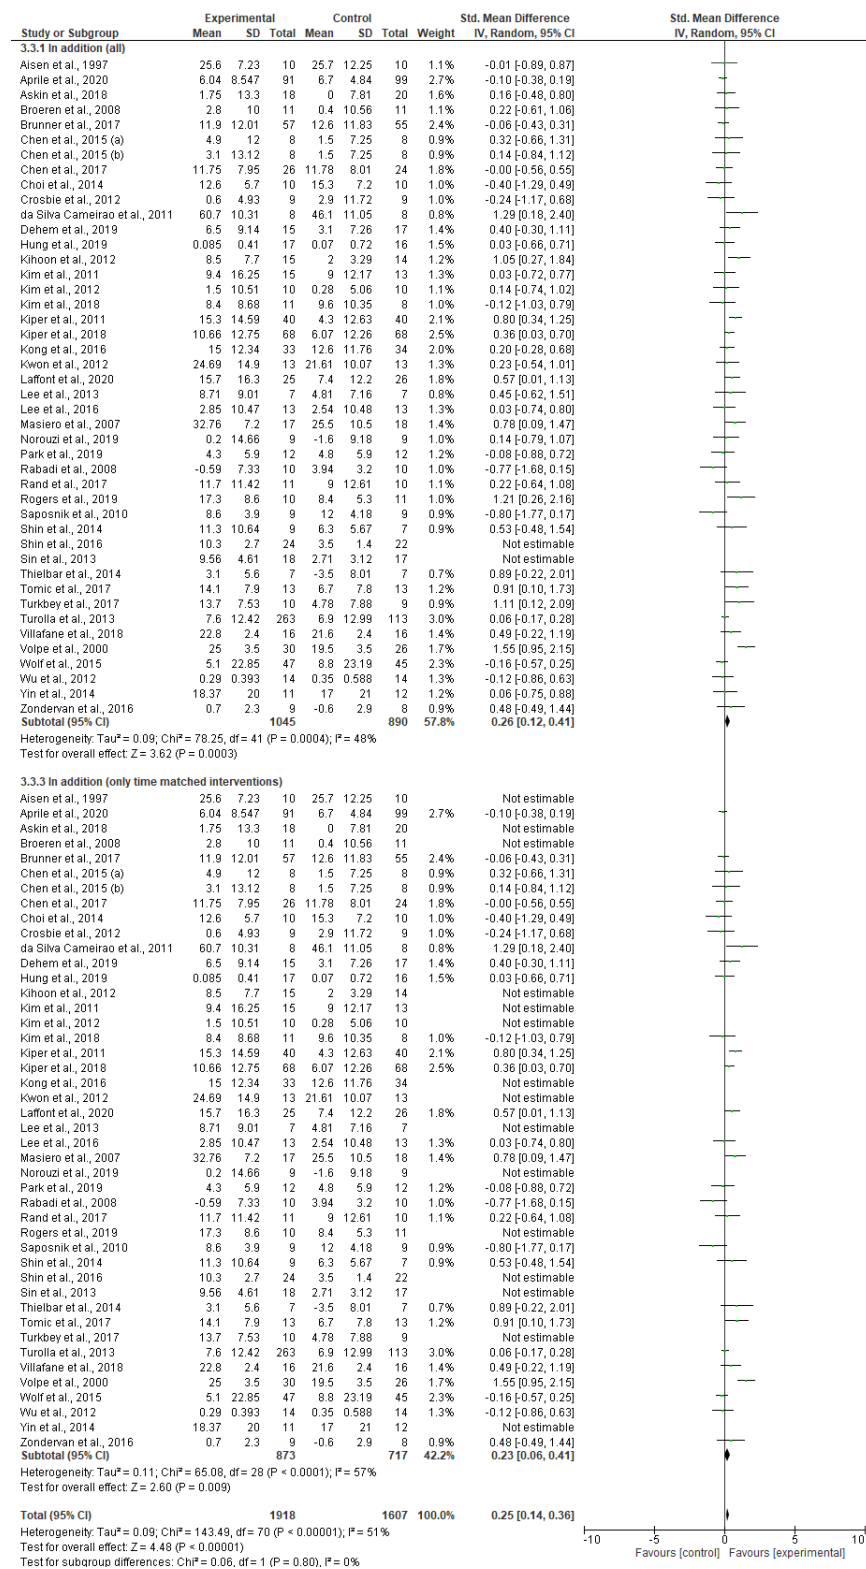

Supplementary Table XI.—New technologies effects on activity when provided in substitution (all studies vs only time-matches interventions).

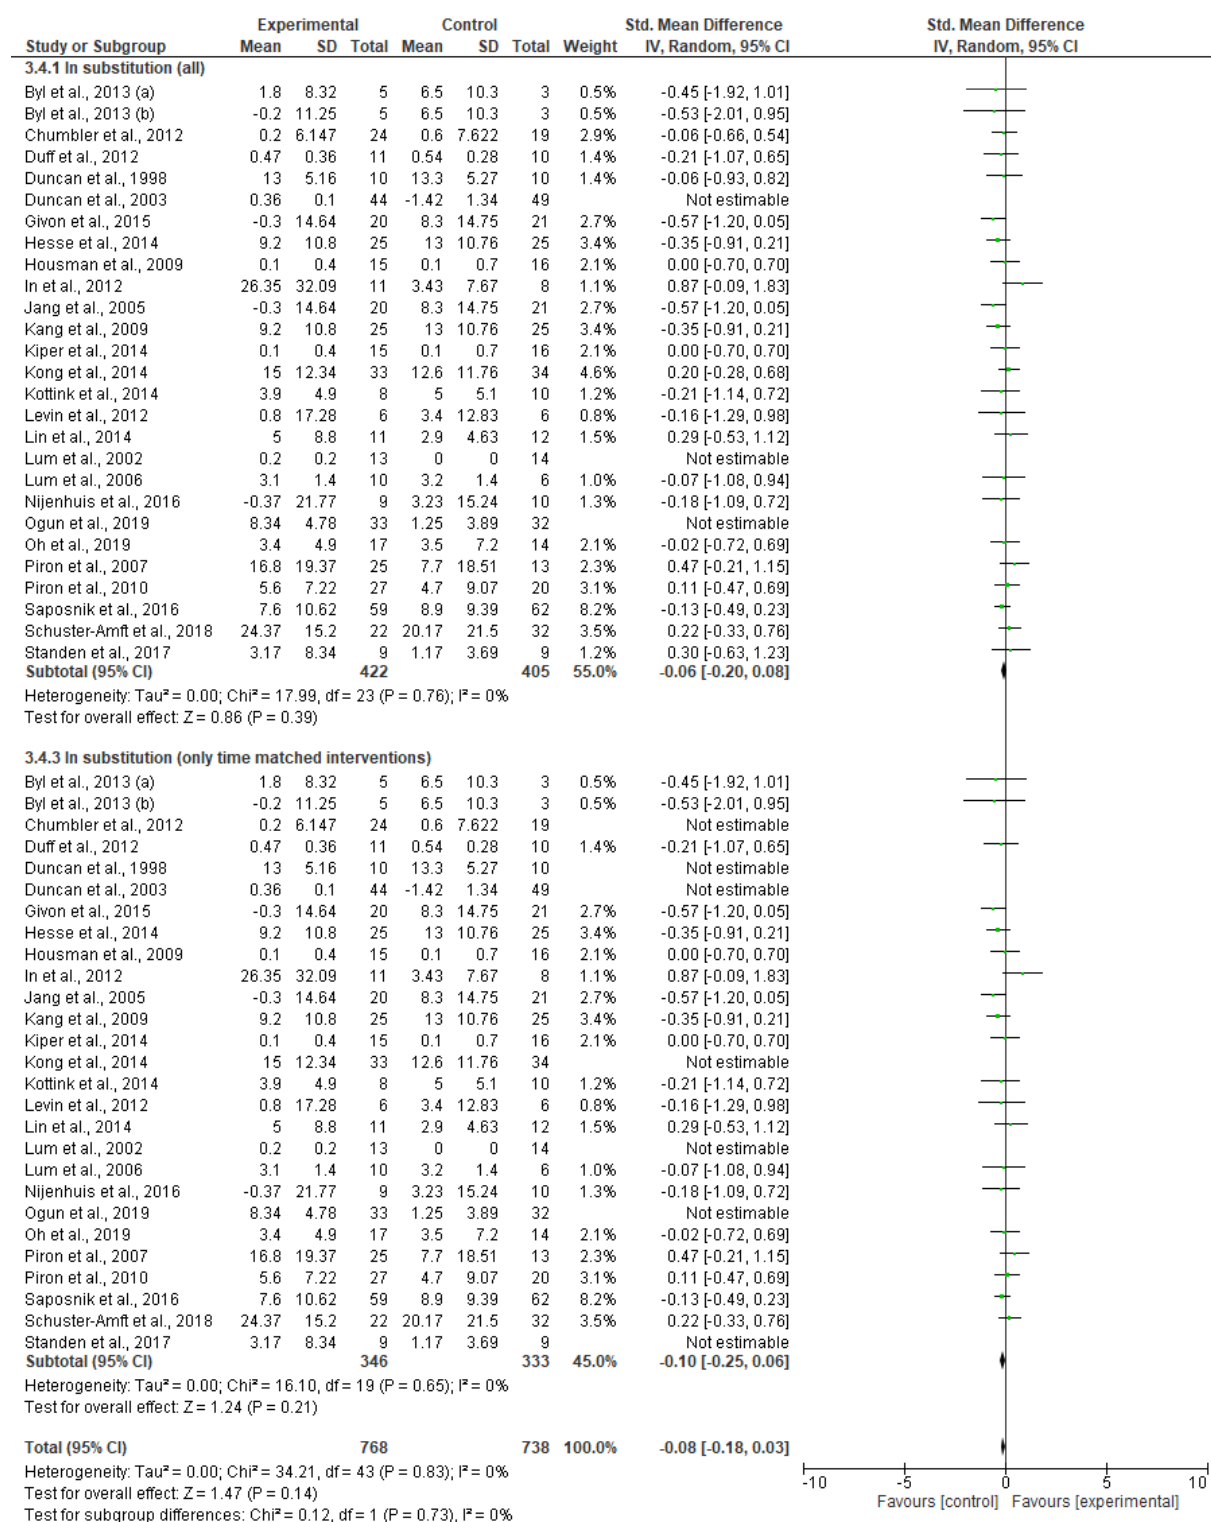

Supplement: Supplementary_Digital_Material4.pdf [file Supplementary_Digital_Material4.pdf]
