# Supplementary material for: New technologies promoting active upper limb rehabilitation after stroke: an overview and network meta-analysis
Source: PubMed Central journal article supplement — Eur J Phys Rehabil Med. 2022 Jun 6;58(4):530–48. doi: 10.23736/S1973-9087.22.07404-4 (PMC9980549; doi:10.23736/s1973-9087.22.07404-4), 2022-06-06

SUPPLEMENTARY DIGITAL MATERIAL 6

Detailed forest-plot regarding new technologies effect on motor function after stroke

Supplementary Table XIII.—Forest-plot regarding the effect of new-technologies on motor function in patients with subacute stroke.

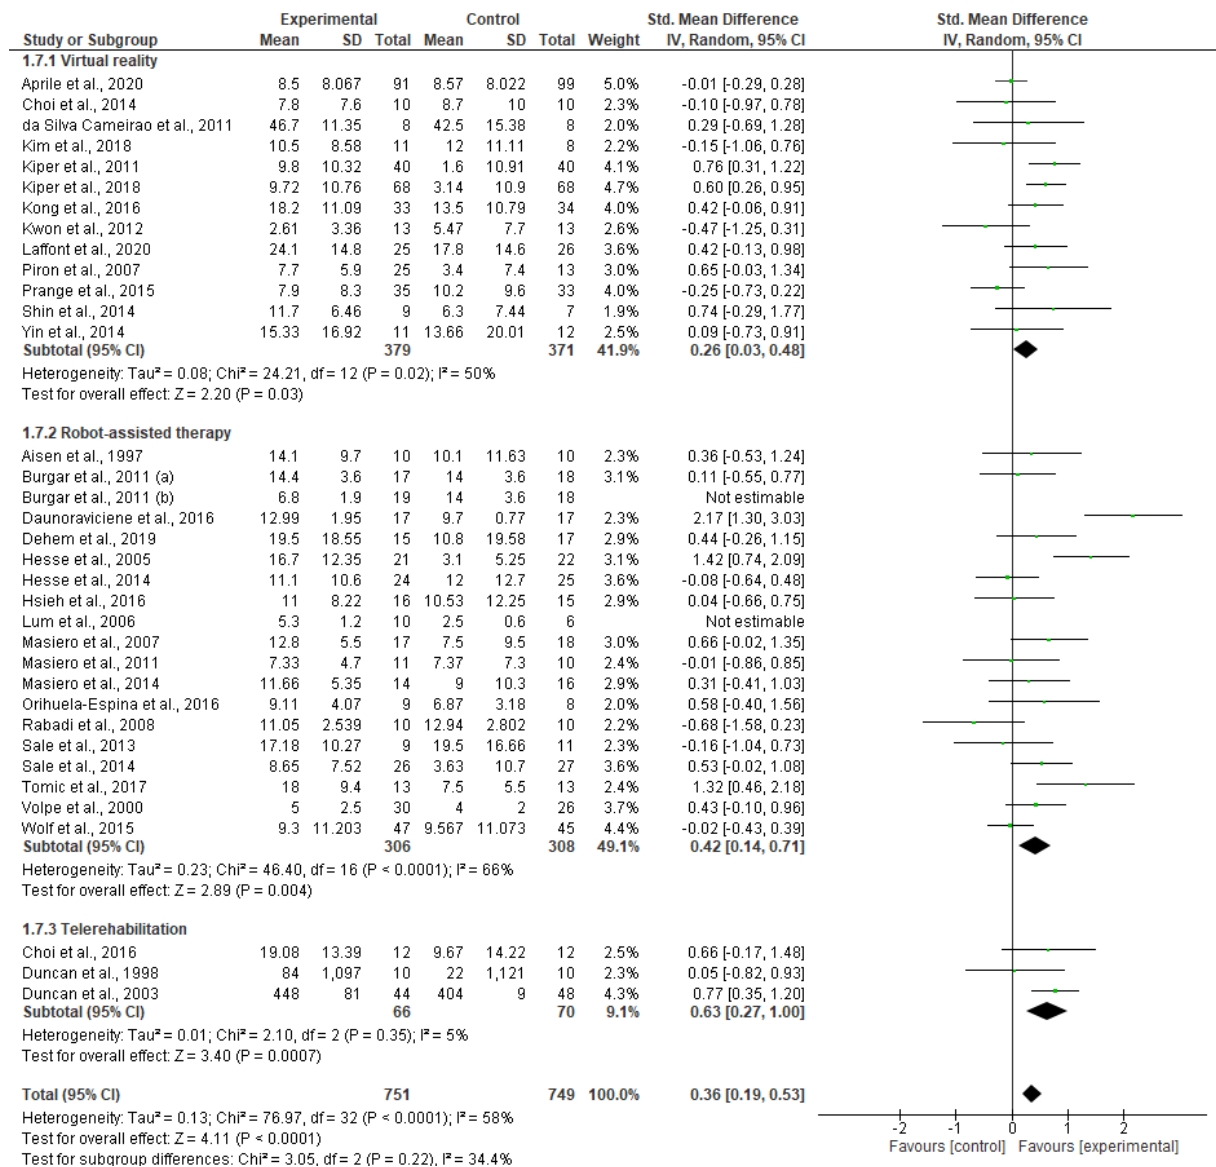

Supplementary Table XIV.—Forest-plot regarding the effect of new-technologies on motor function in patients with chronic stroke.

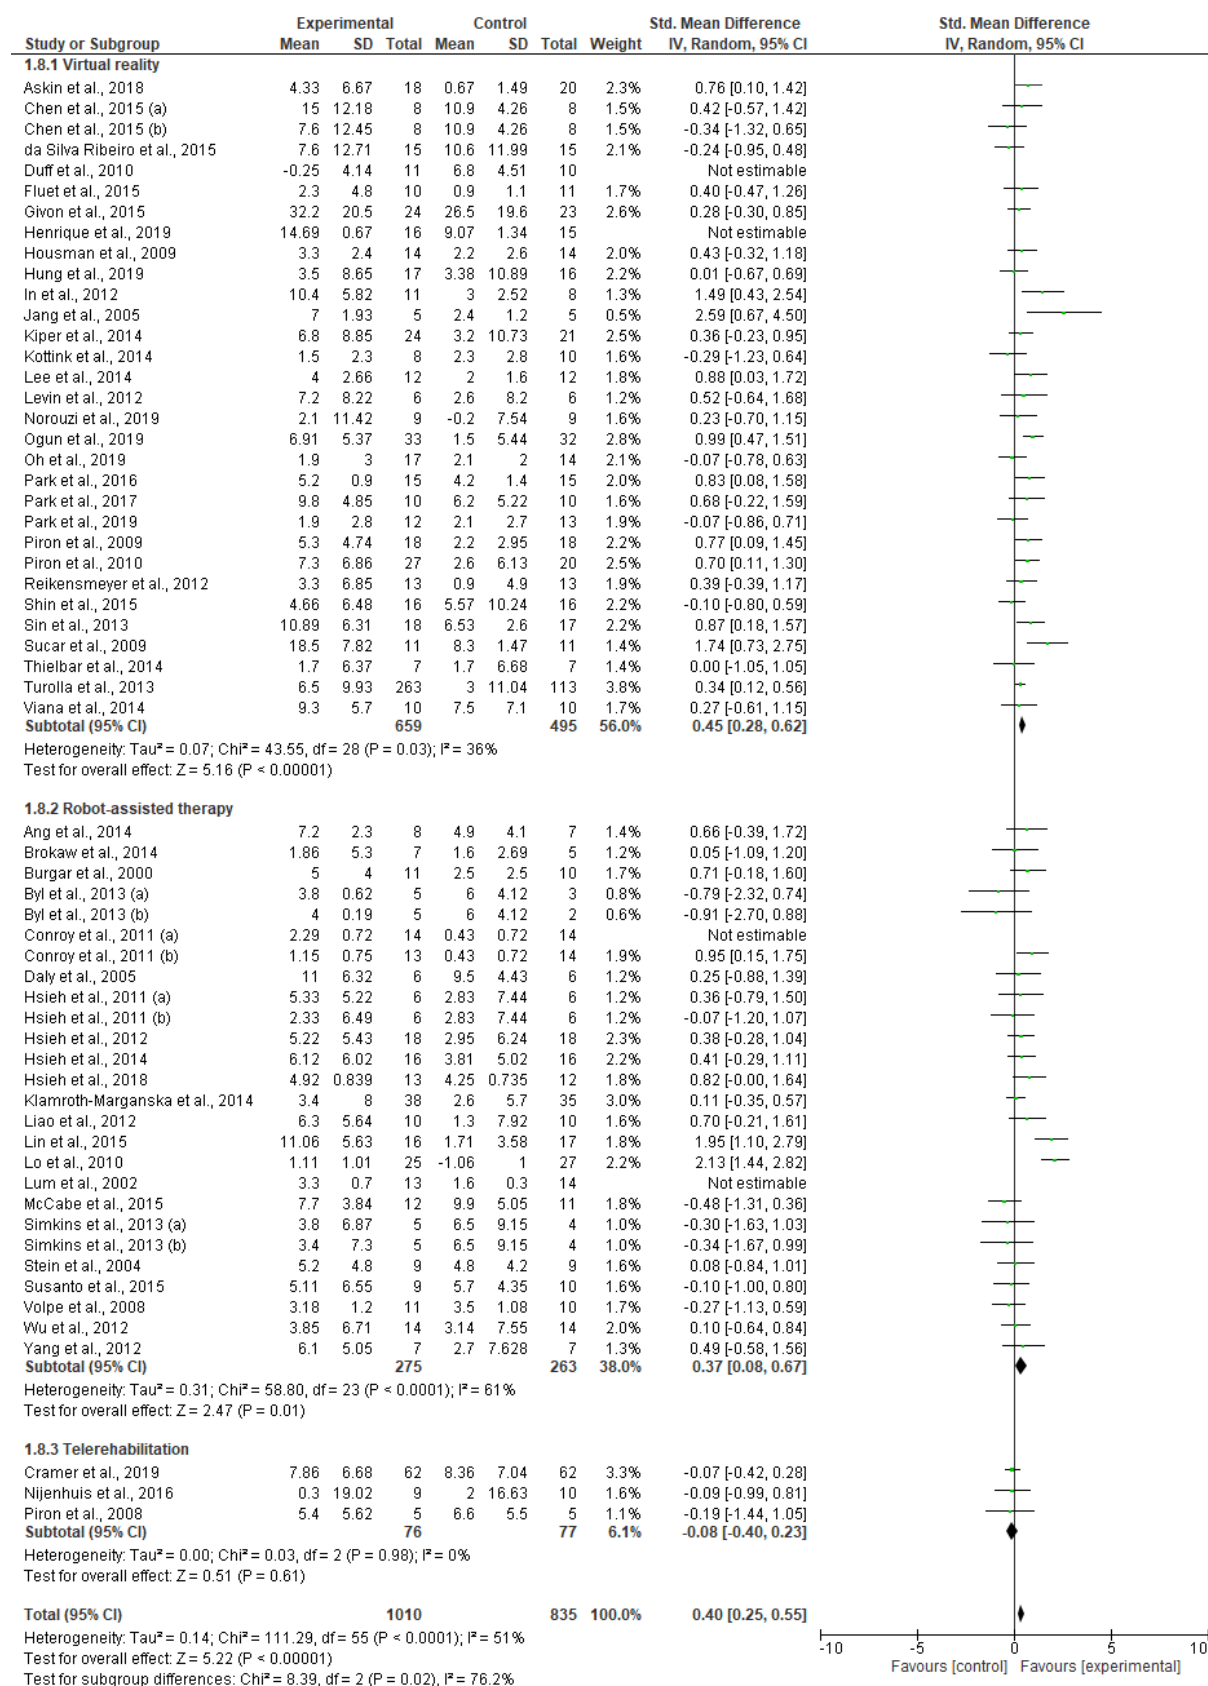

Supplementary Table XV.—Forest-plot regarding the effect of new-technologies on motor function in patients with stroke when provided in addition vs in substitution of conventional therapy.

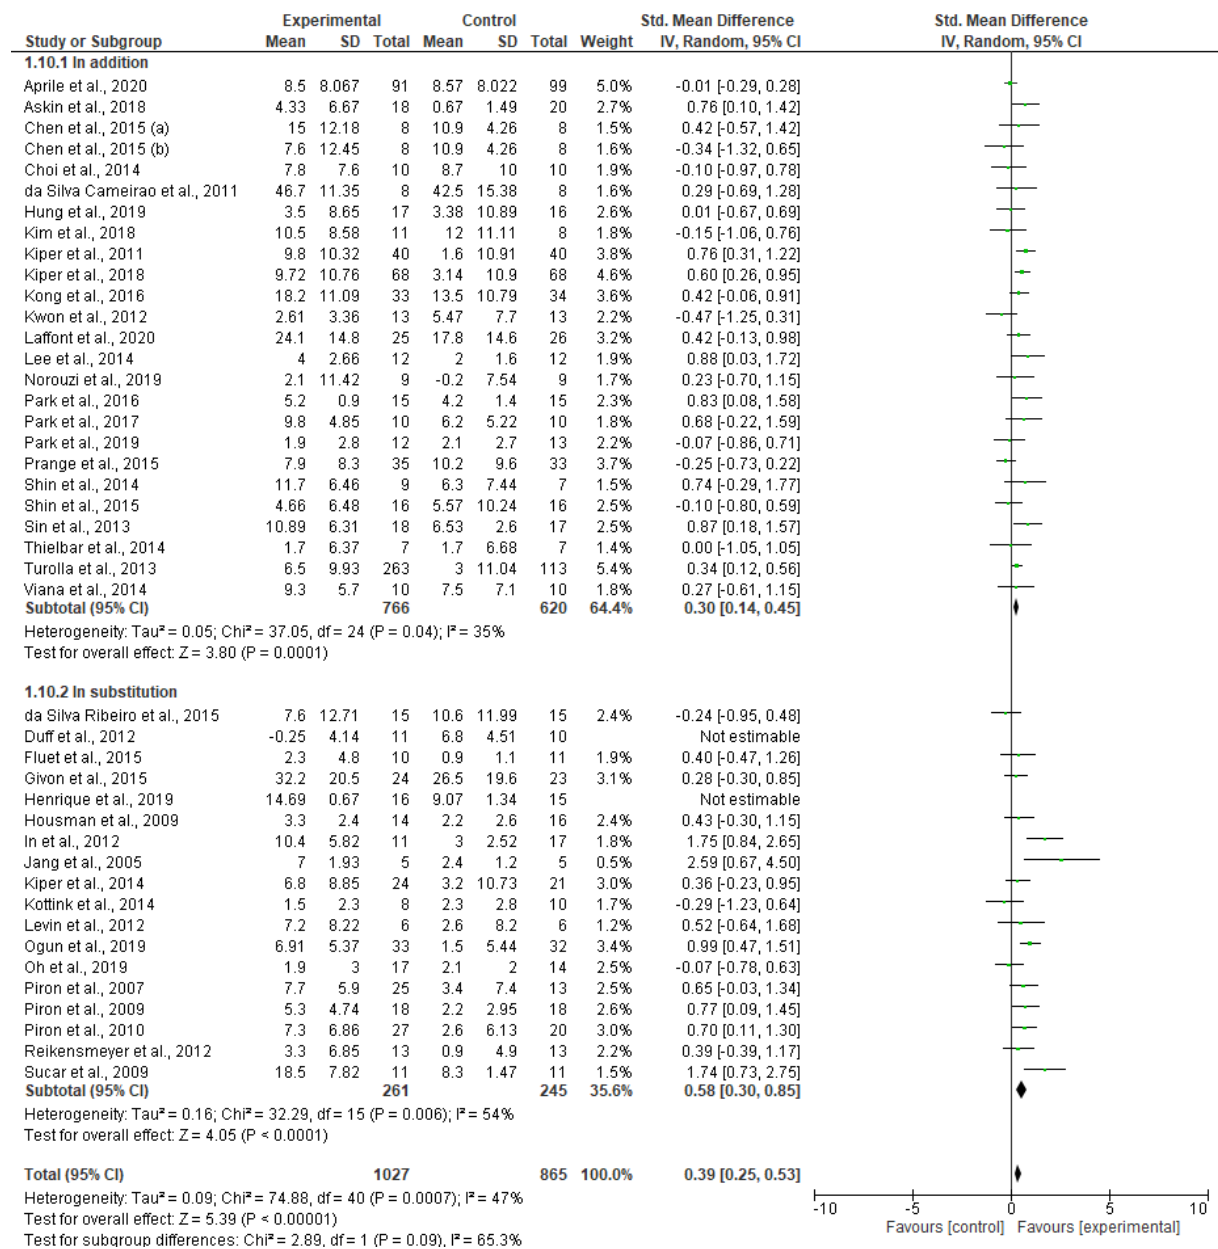

## Supplementary Table XVI.—Robot-assisted therapy.

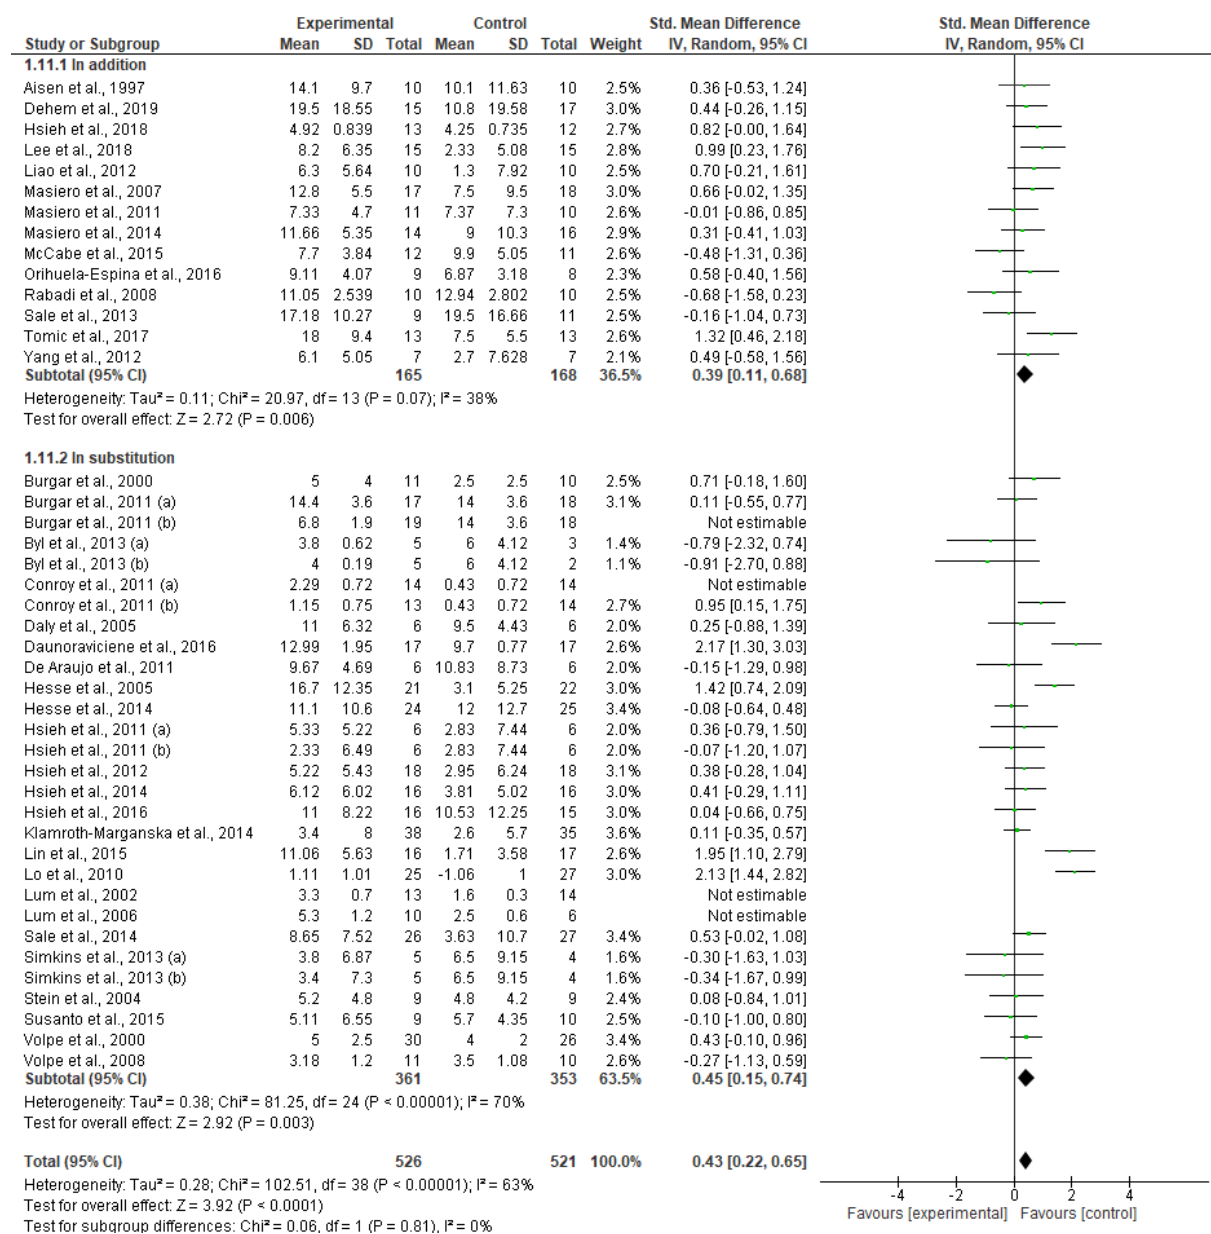

Supplementary Table XVII.—Telerehabilitation.

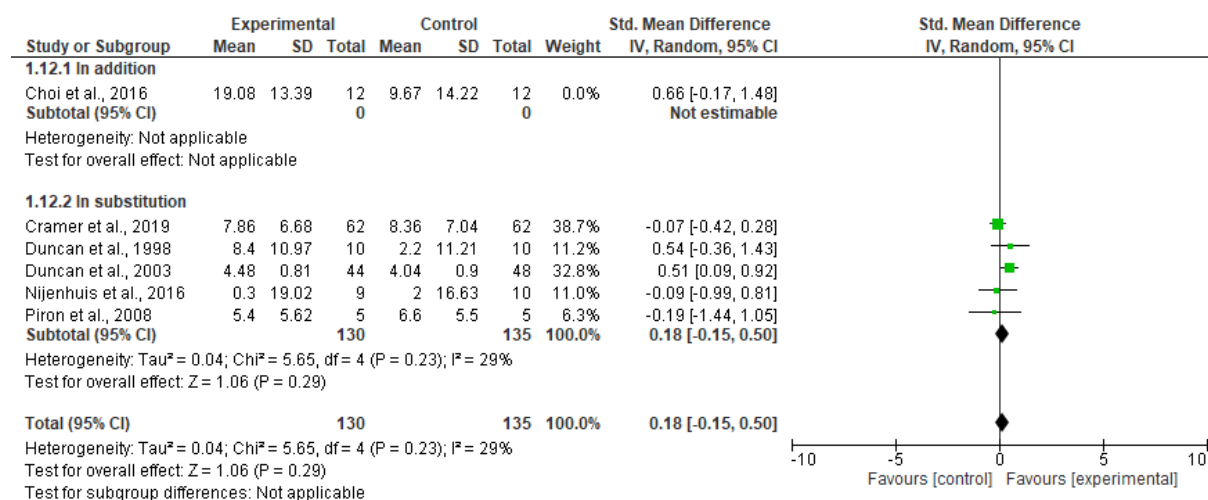

Supplementary Table XVIII.—Forest-plot regarding the effect of new-technologies on motor function in patients with subacute stroke according to the impairment severity - robot-assisted therapy.

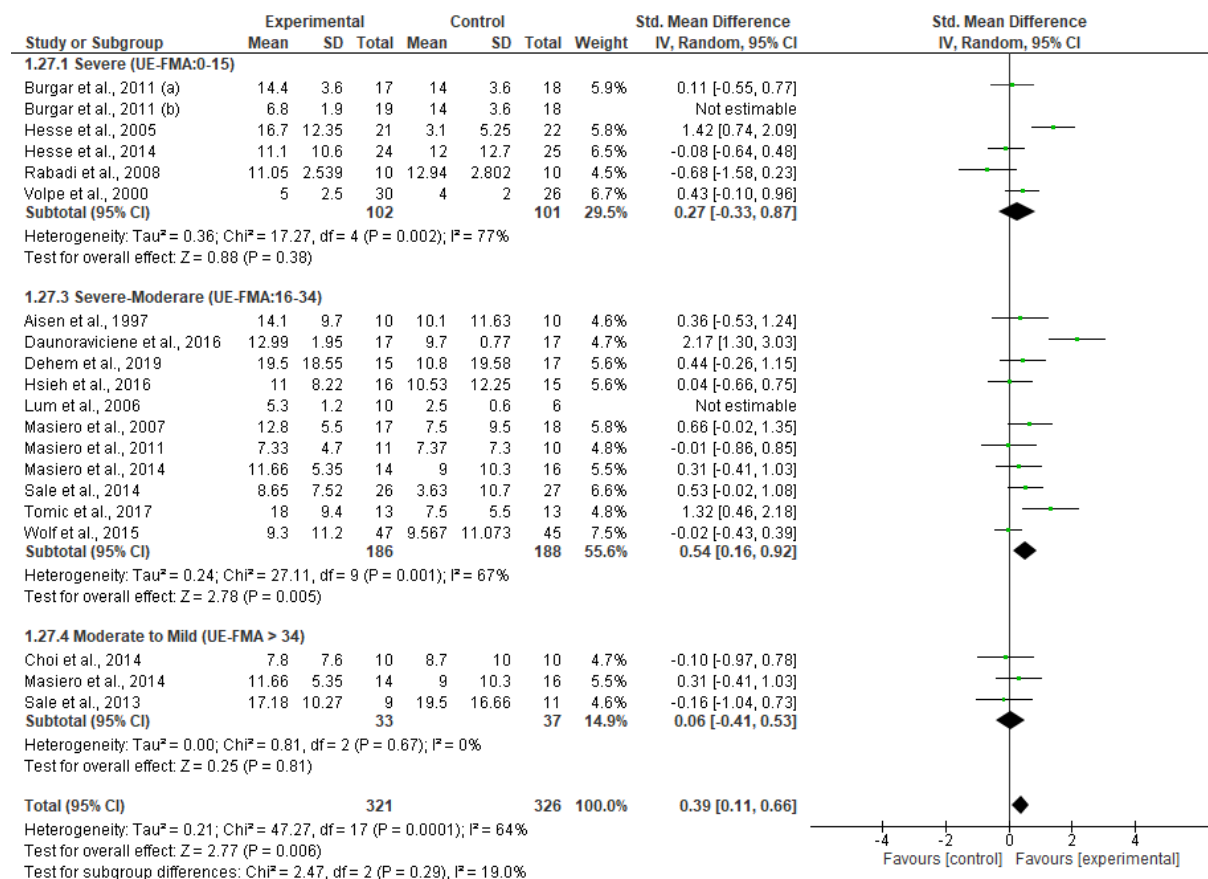

## Supplementary Table XIX.—Virtual reality.

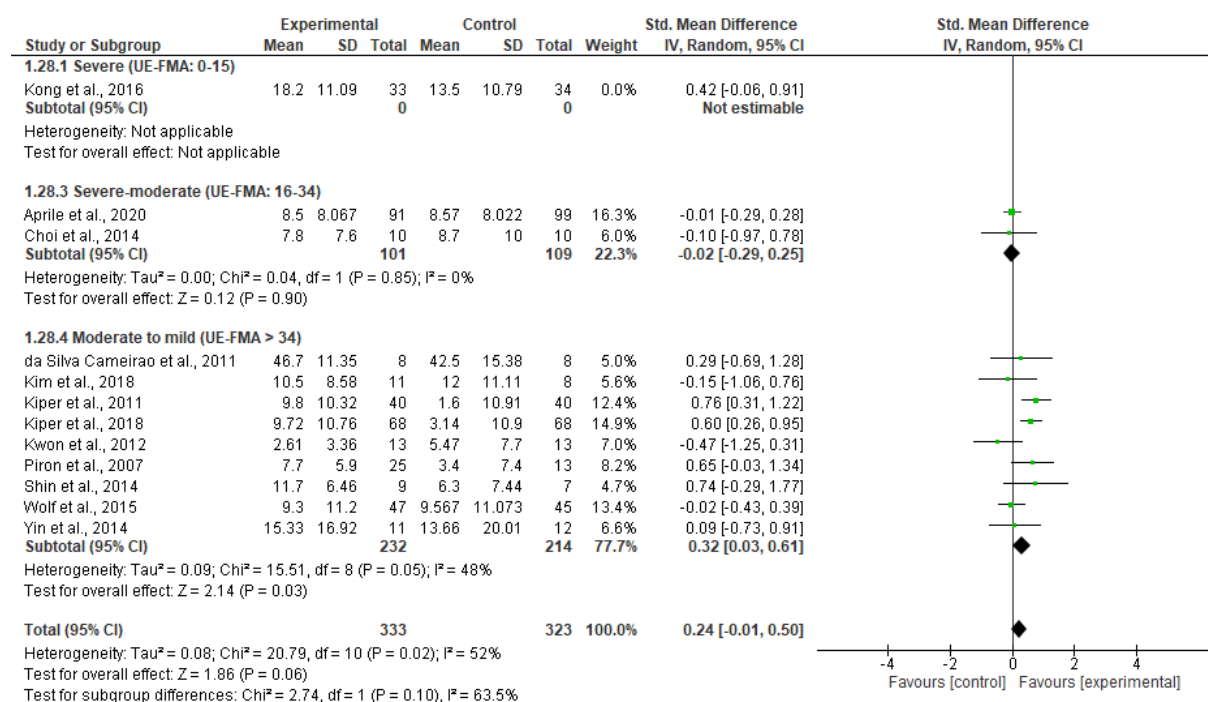

## Supplementary Table XX.—Telerehabilitation.

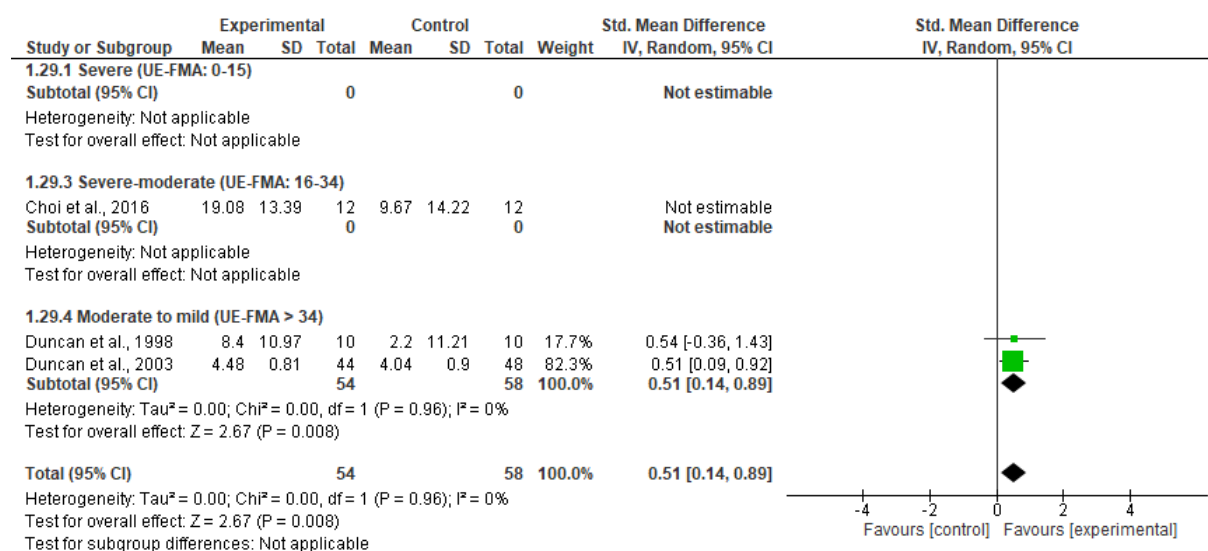

Supplementary Table XXI.—Forest-plot regarding the effect of new-technologies on motor function in patients with chronic stroke according to the impairment severity - robot-assisted therapy.

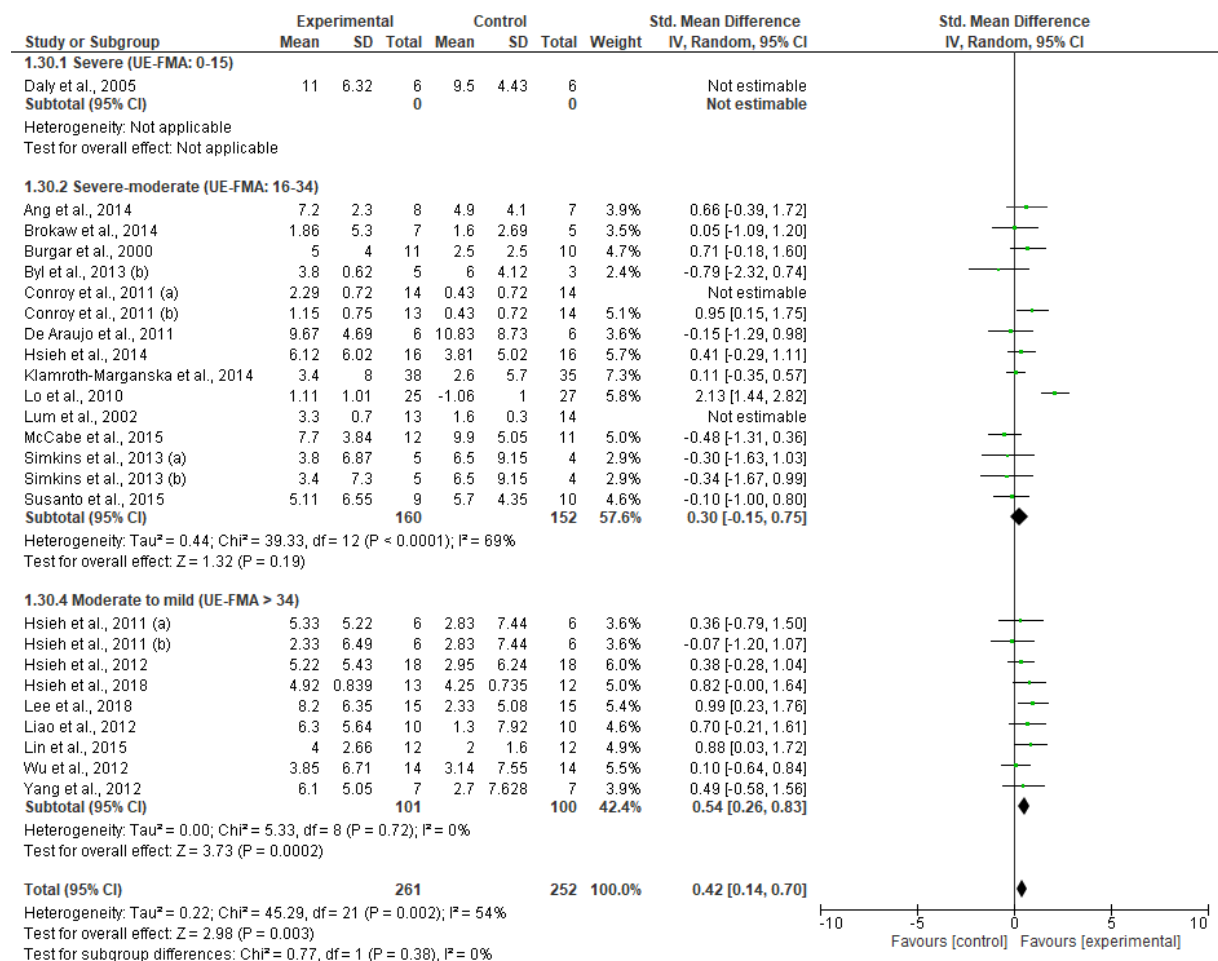

Supplementary Table XXII.—Virtual reality.

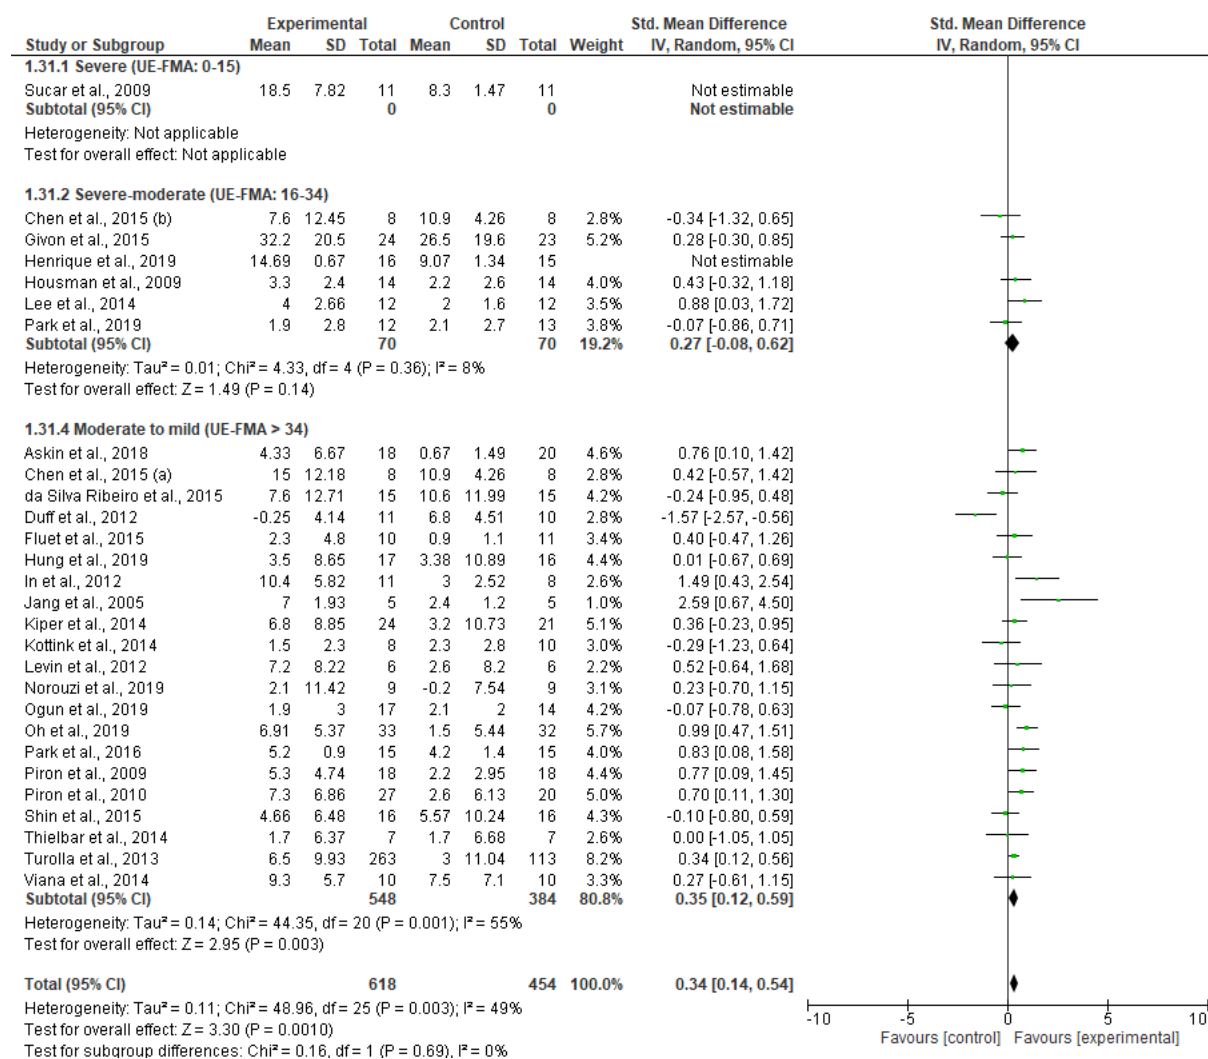



Supplementary Table XXIII.—Telerehabilitation.

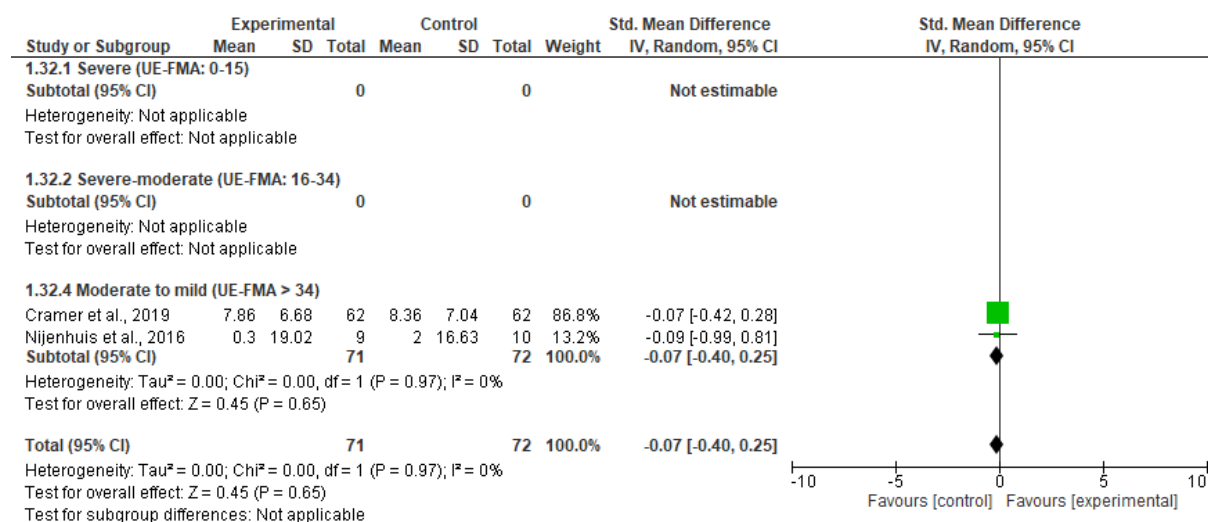

Supplementary Table XXIV.—Forest-plot regarding the effect of new-technologies on motor function in patients with subacute stroke according to the treatment intensity - robot-assisted therapy.

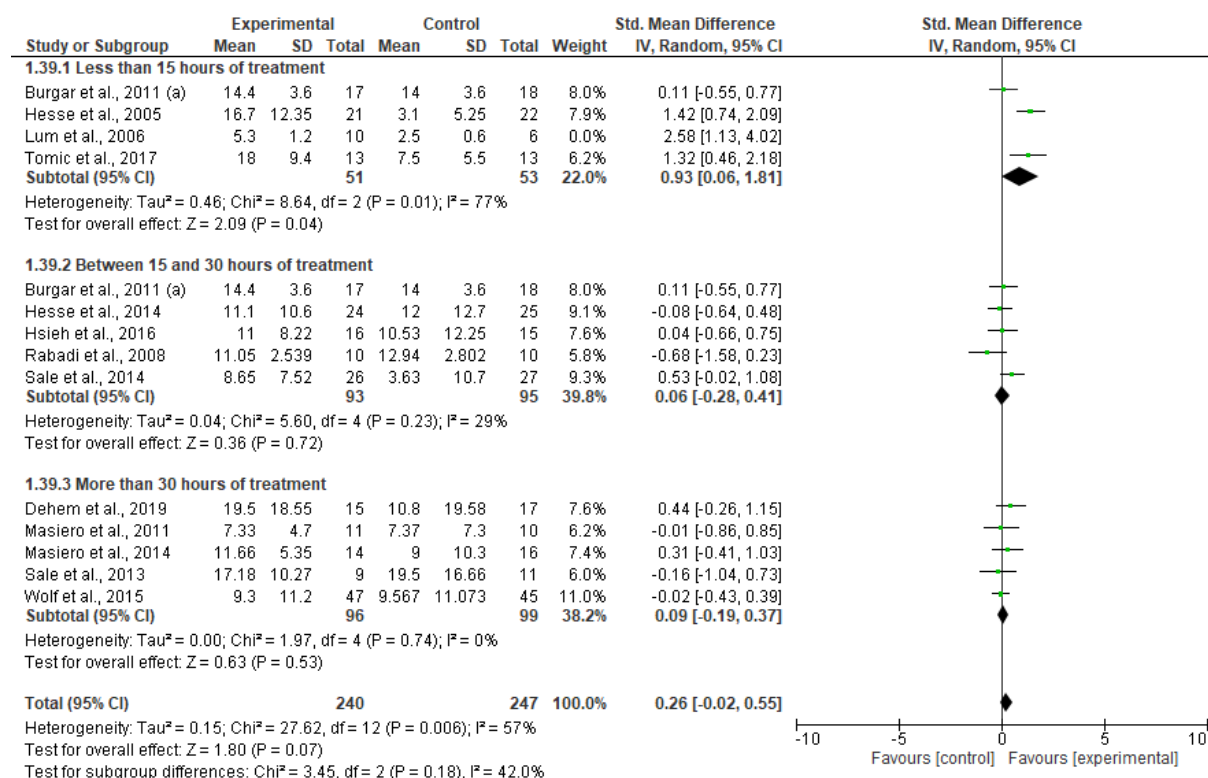

## Supplementary Table XXV.—Virtual reality.

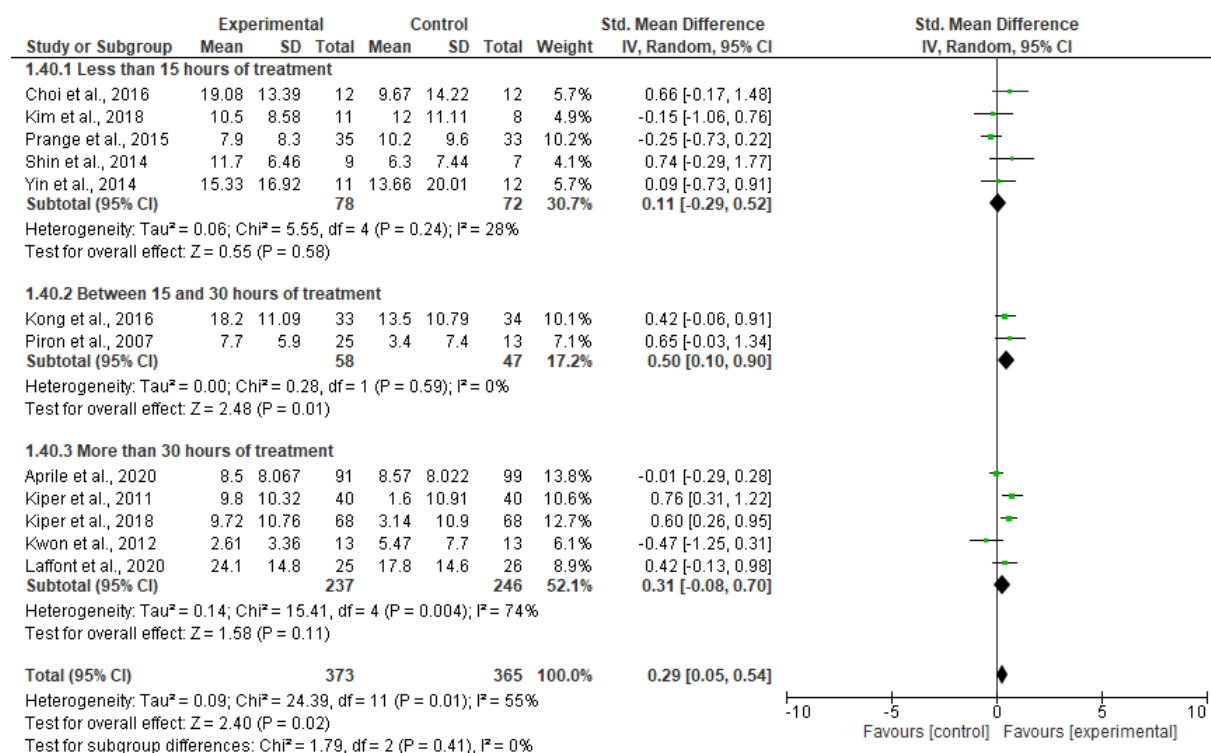

## Supplementary Table XXVI.—Telerehabilitation.

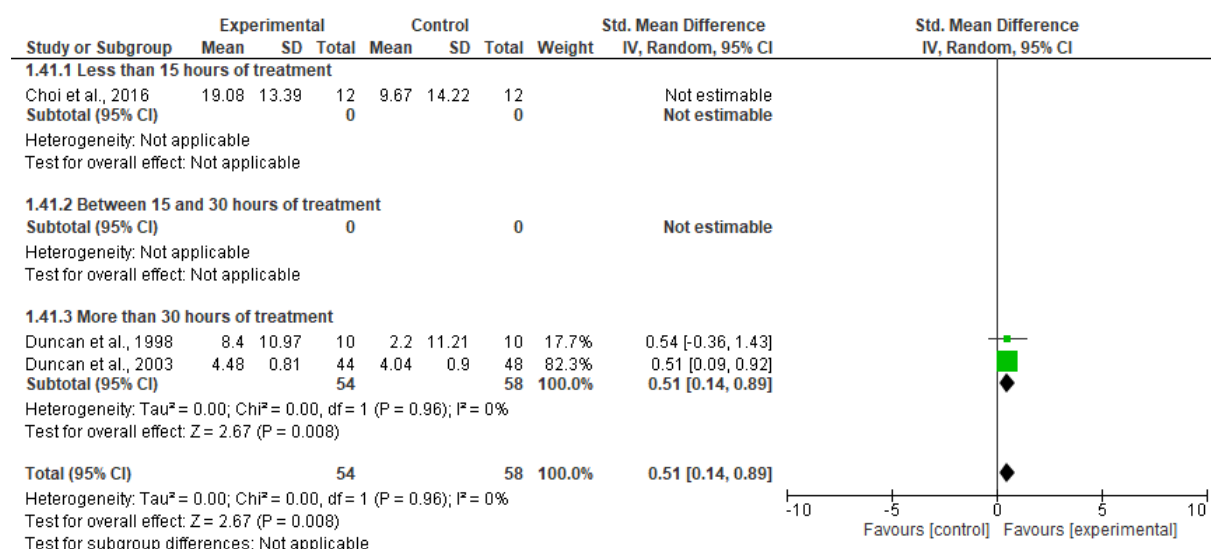

Supplementary Table XXVII.—Forest-plot regarding the effect of new-technologies on motor function in patients with chronic stroke according to the treatment intensity - robot-assisted therapy.

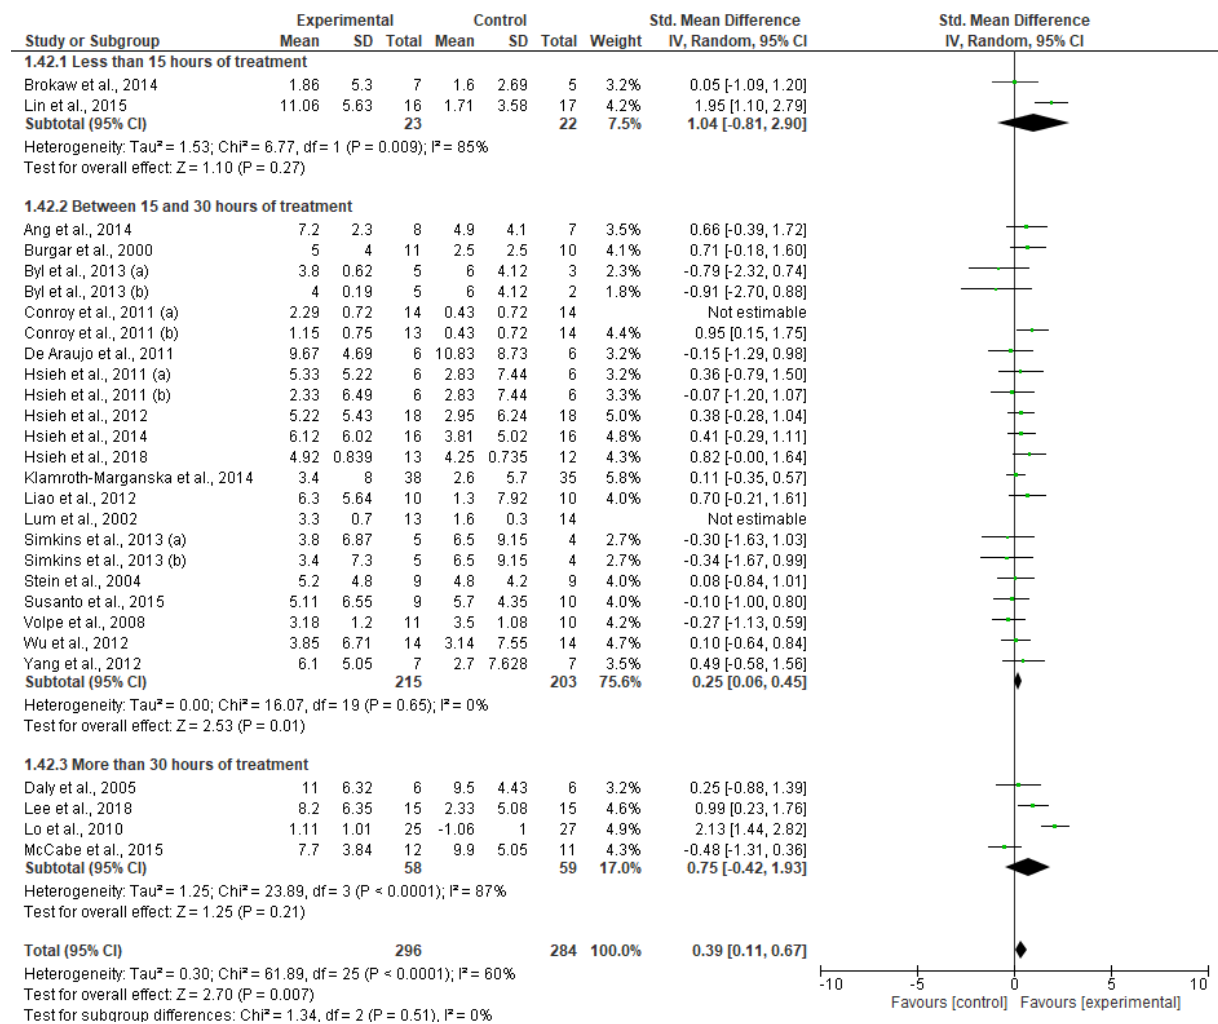

## Supplementary Table XXVIII.—Virtual reality.

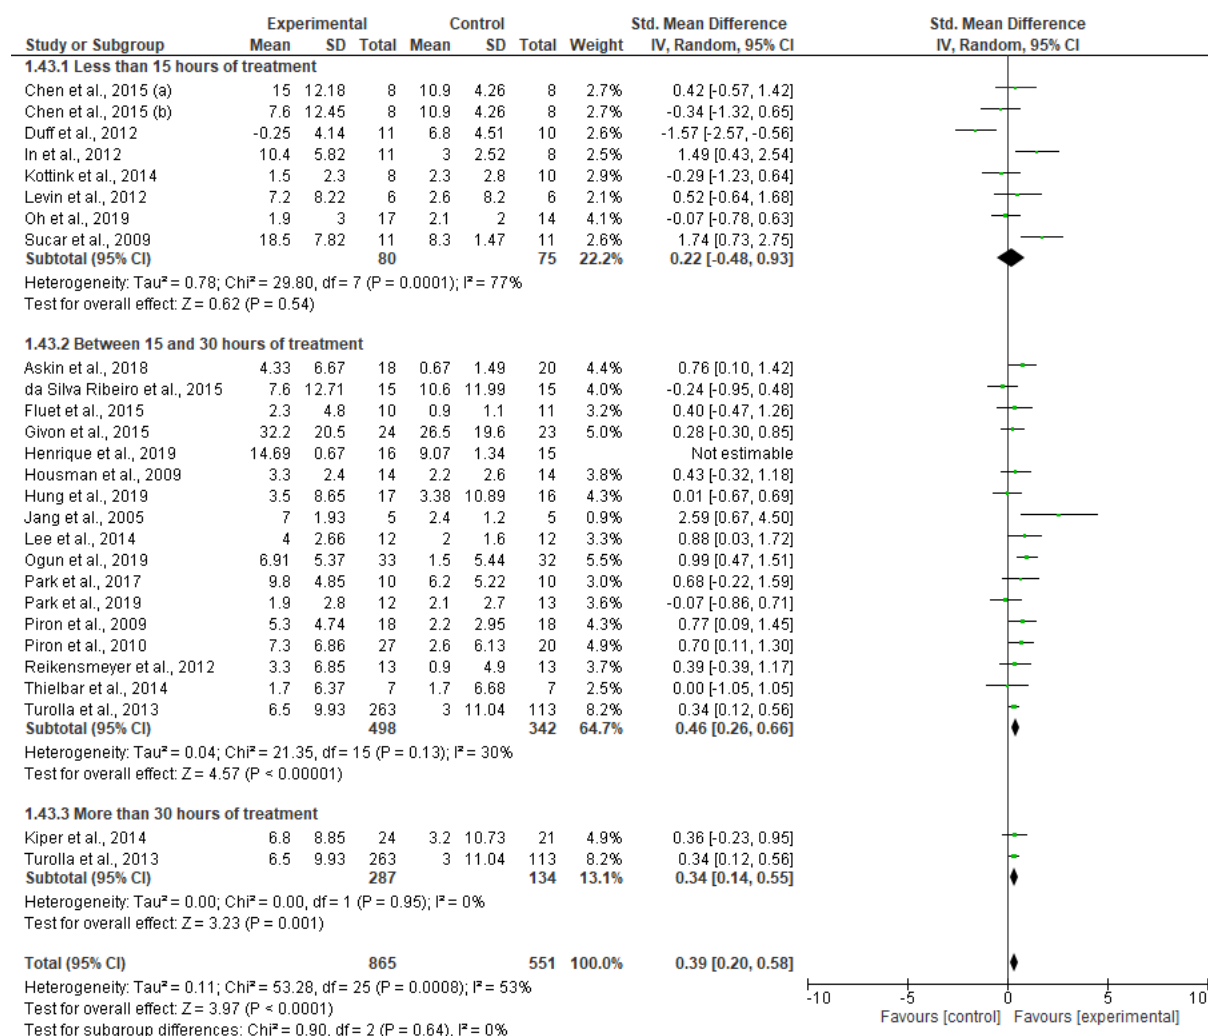

## Supplementary Table XXIX.—Telerehabilitation.

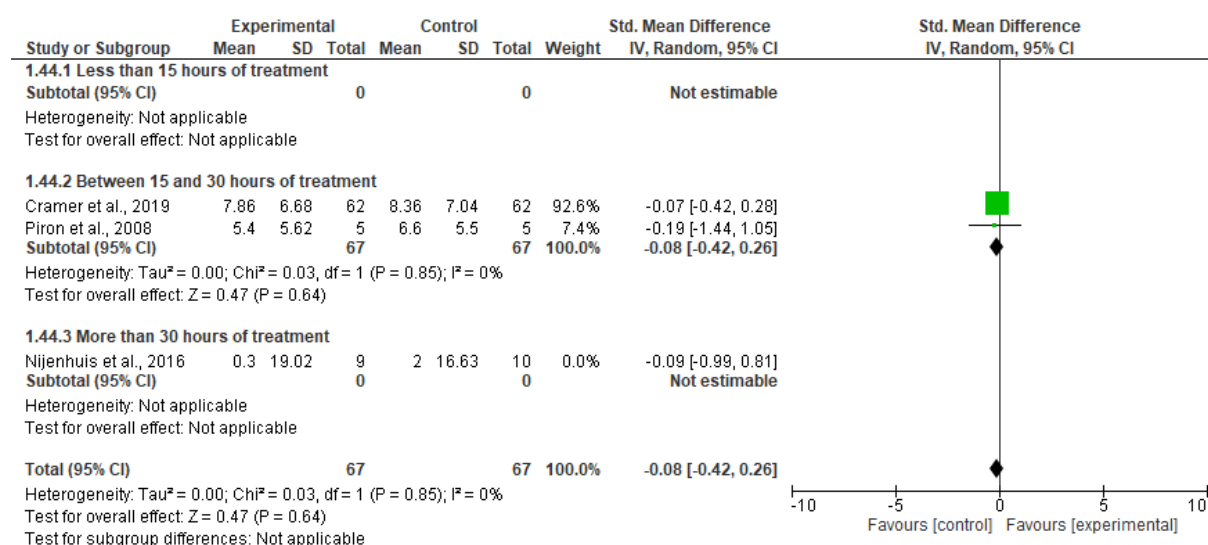

Supplement: Supplementary_Digital_Material6.pdf [file Supplementary_Digital_Material6.pdf]
