# Supplementary material for: New technologies promoting active upper limb rehabilitation after stroke: an overview and network meta-analysis
Source: PubMed Central journal article supplement — Eur J Phys Rehabil Med. 2022 Jun 6;58(4):530–48. doi: 10.23736/S1973-9087.22.07404-4 (PMC9980549; doi:10.23736/s1973-9087.22.07404-4), 2022-06-06

SUPPLEMENTARY DIGITAL MATERIAL 8

Detailed forest-plot regarding new technologies effect on activity after stroke

Supplementary Table XXXII.—Forest-plot regarding the effect of new-technologies on activity in patients with subacute stroke.

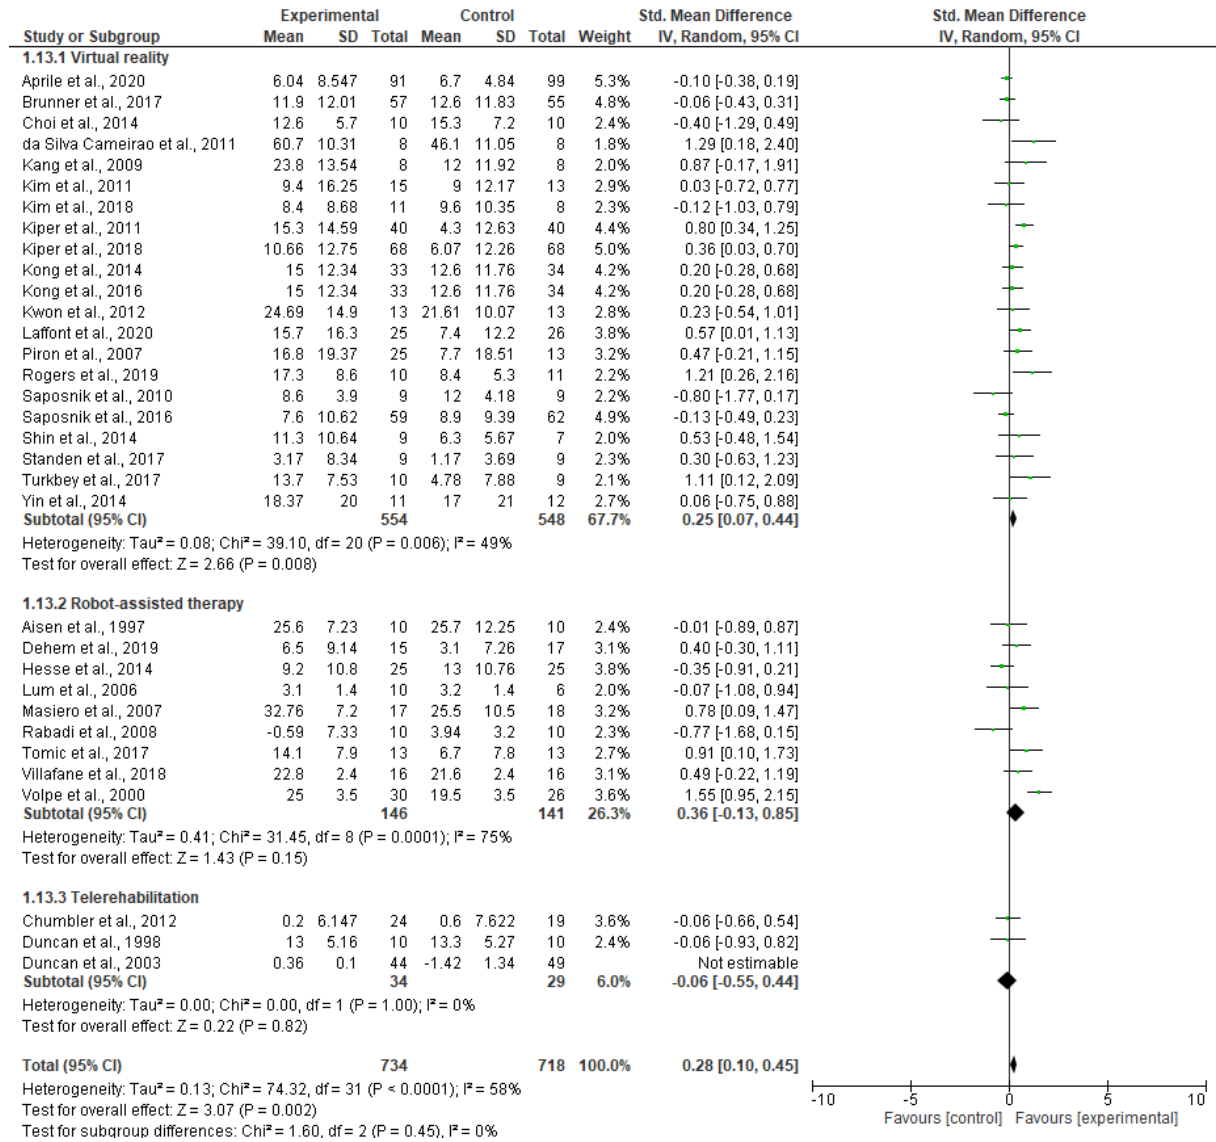

Supplementary Table XXXIII.—Forest-plot regarding the effect of new-technologies on activity in patients with chronic stroke.

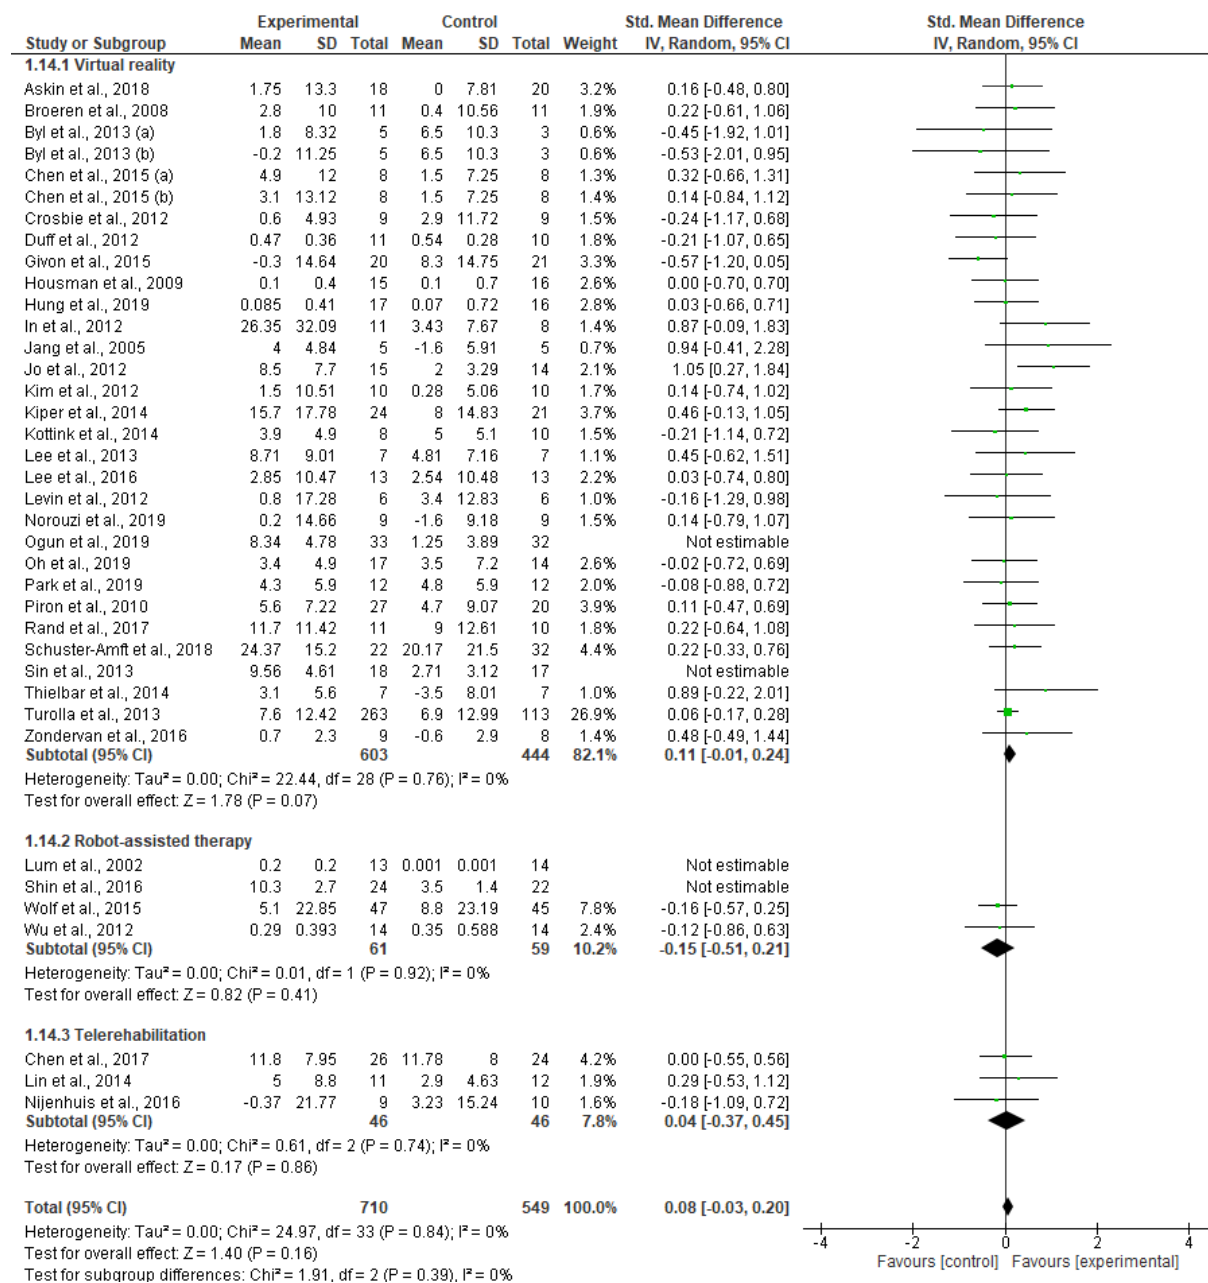

Supplementary Table XXXIV.—Forest-plot regarding the effect of new-technologies on activity in patients with chronic stroke when provided in addition vs in substitution of conventional therapy - virtual reality.

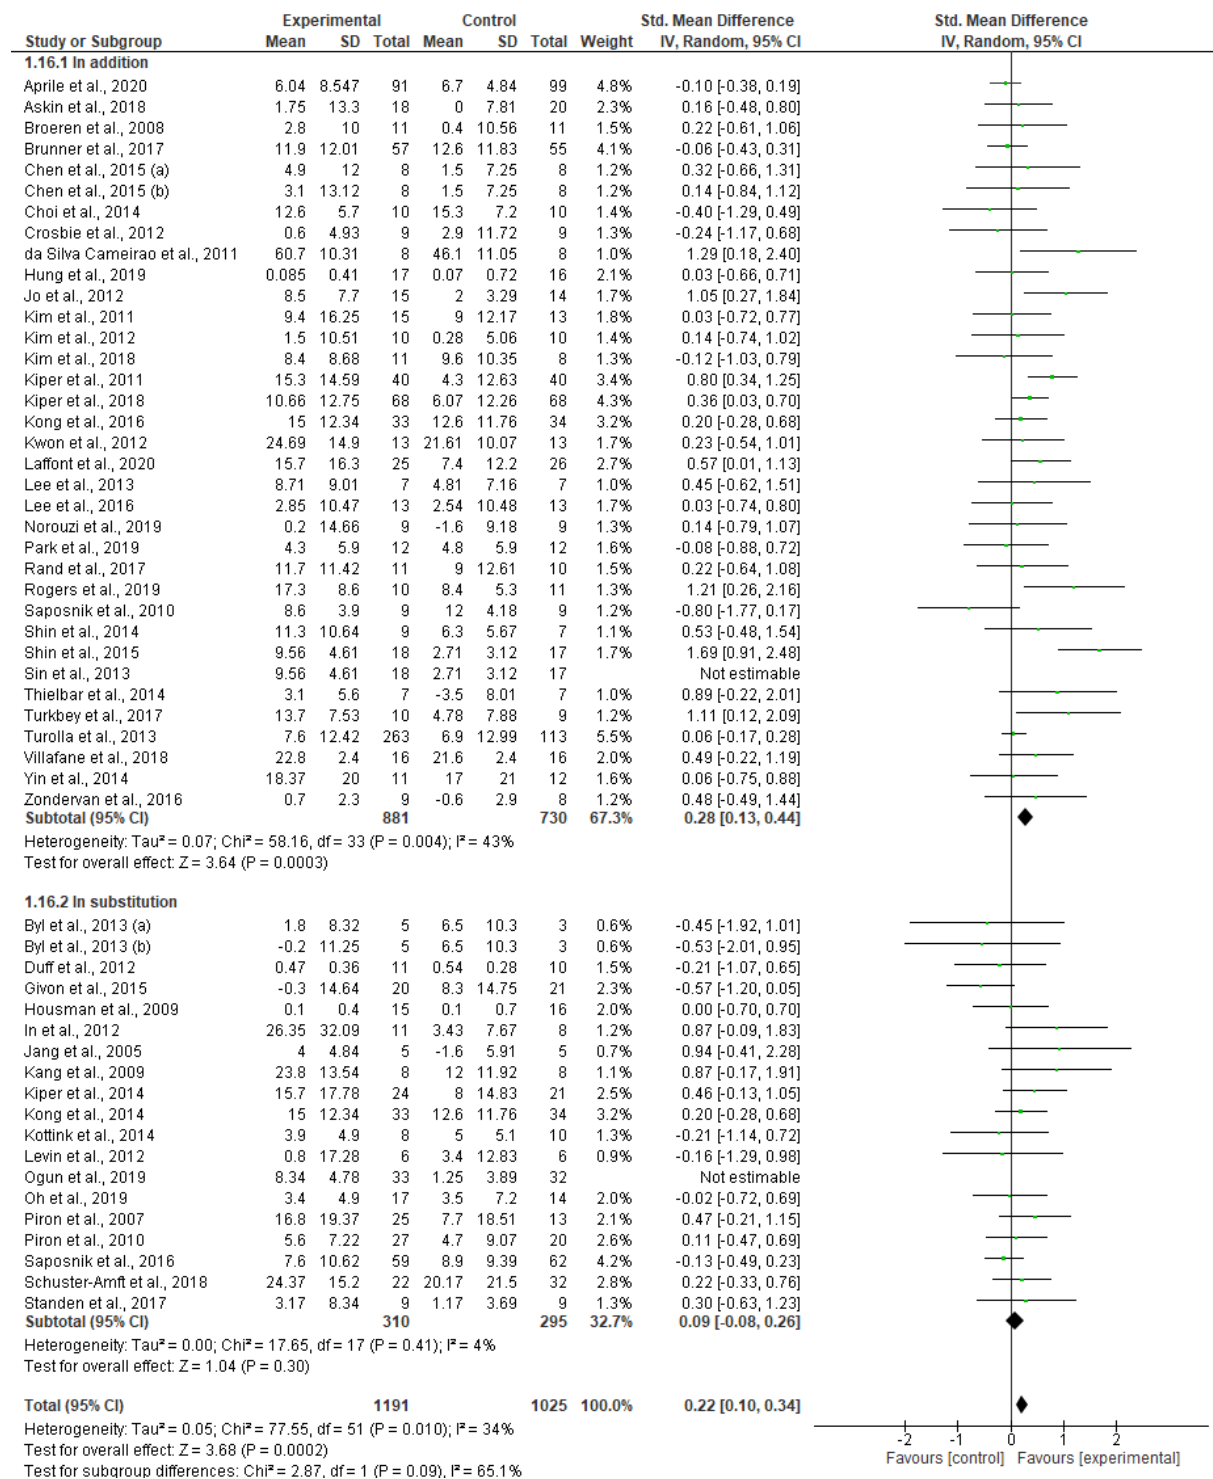

Supplementary Table XXXV.—Robot-assisted therapy.

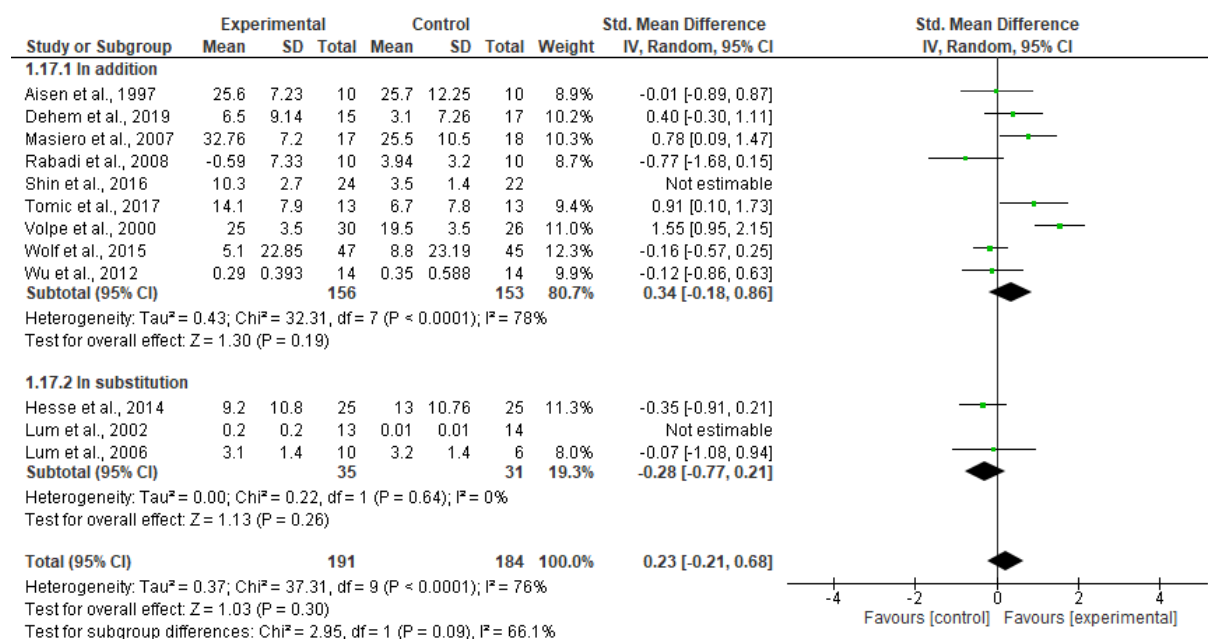

## Supplementary Table XXXVI.—Telerehabilitation.

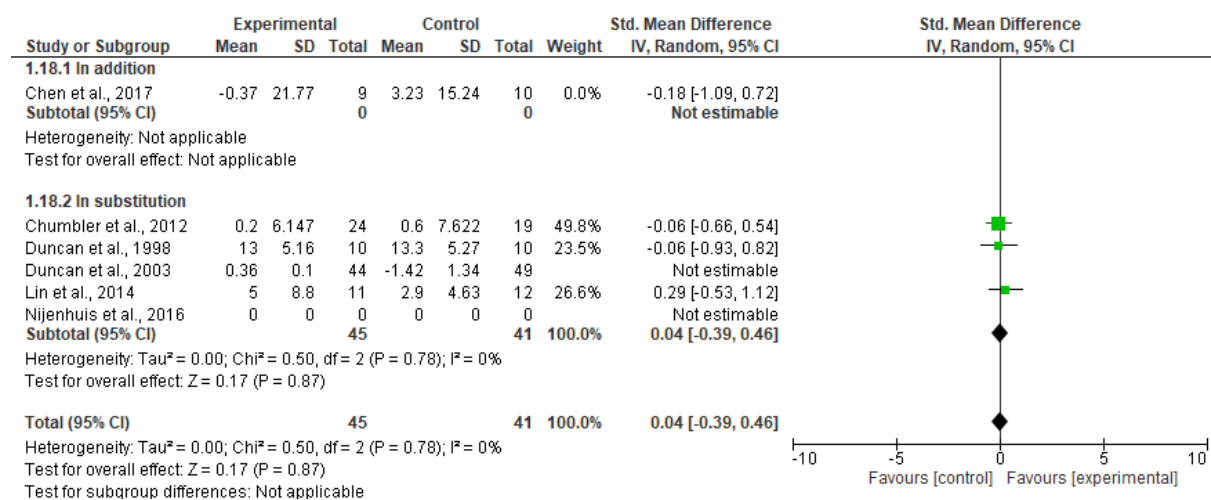

## Supplementary Table XXXVII.—Forest-plot regarding the effect of new-technologies on activity in patients with subacute stroke according to the impairment severity - robot-assisted therapy.

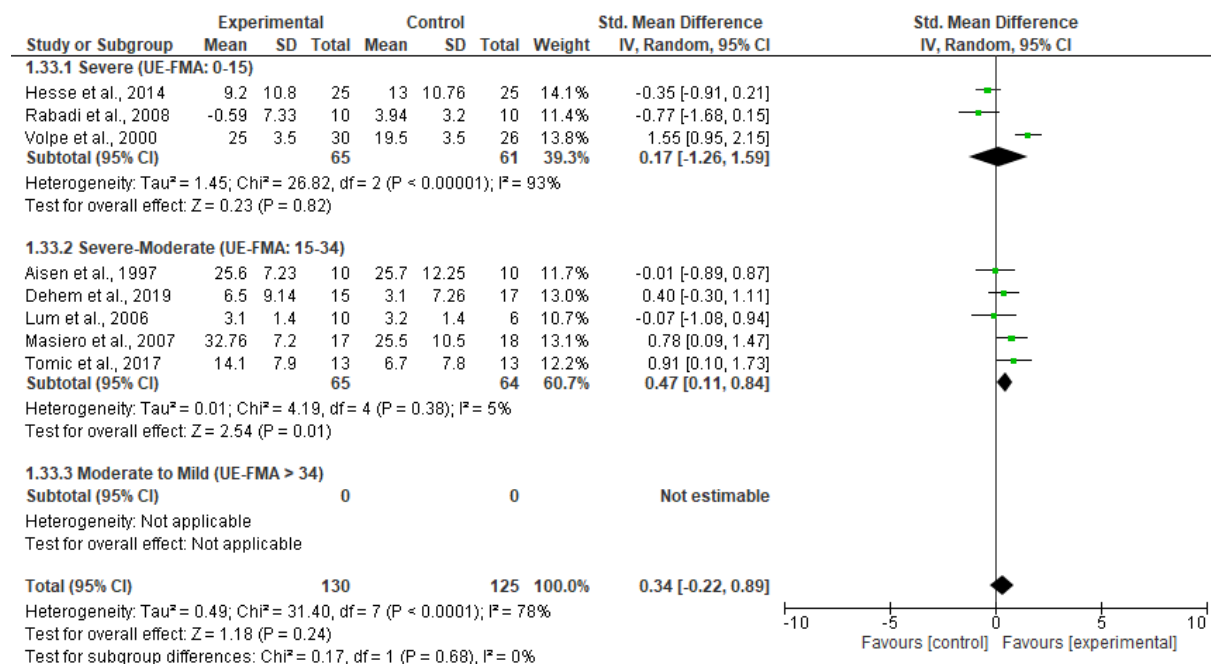

## Supplementary Table XXXVIII.—Virtual reality.

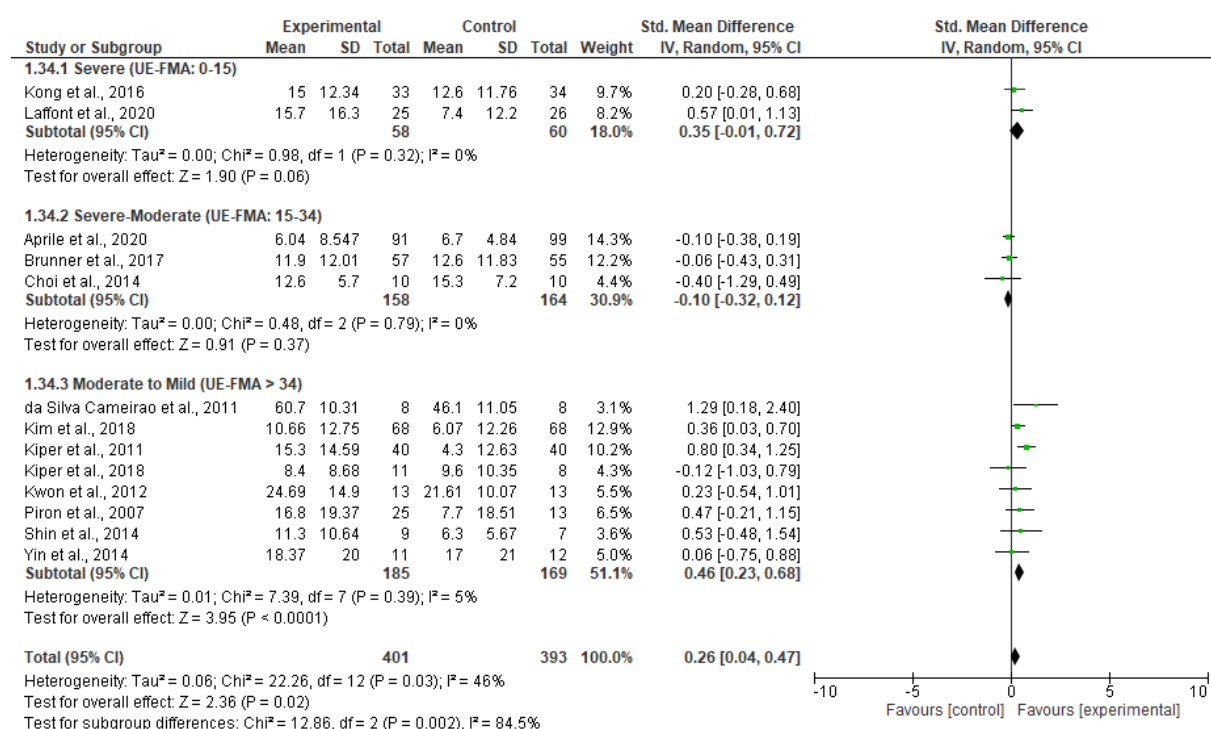

## Supplementary Table XXXIX.—Telerehabilitation.

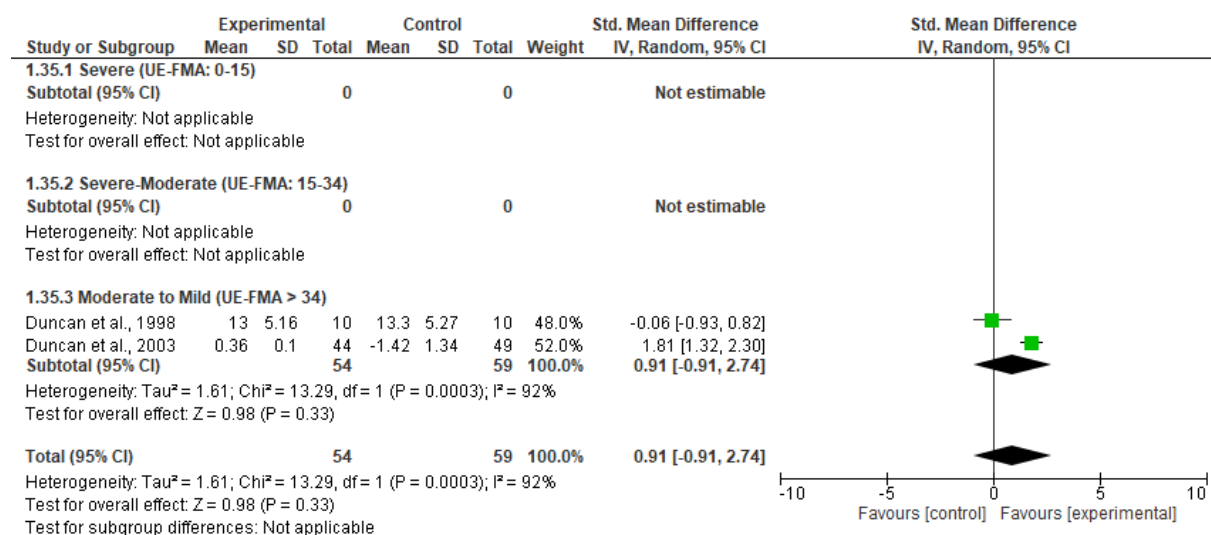

Supplementary Table XL.—Forest-plot regarding the effect of new-technologies on activity in patients with chronic stroke according to the impairment severity - robot-assisted therapy.

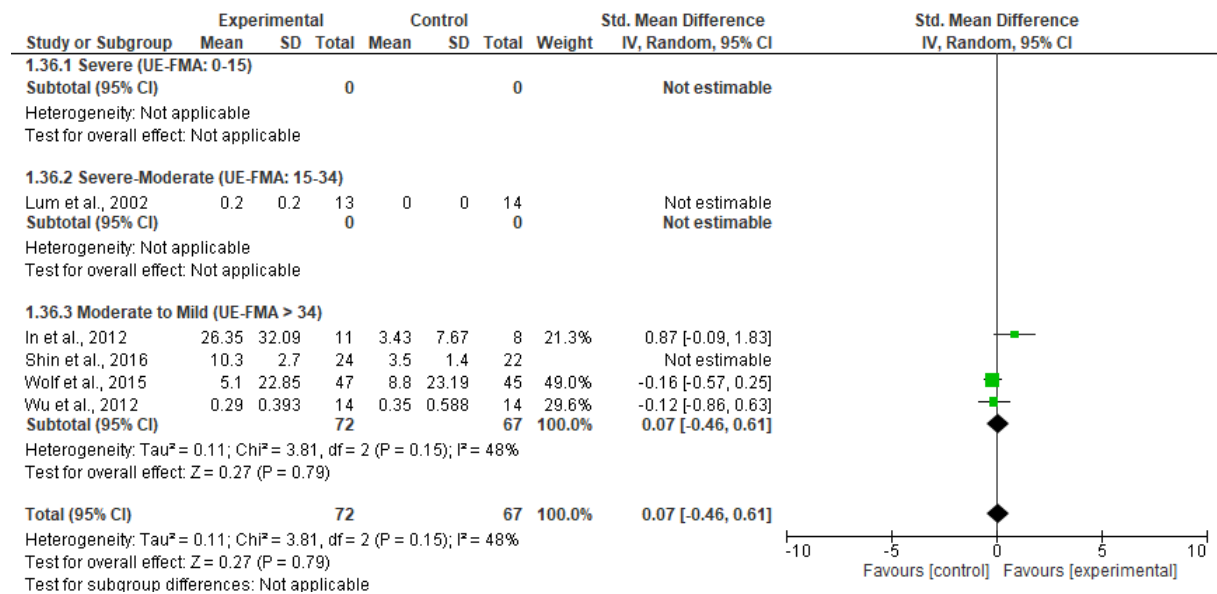

## Supplementary Table XLI.—Virtual reality.

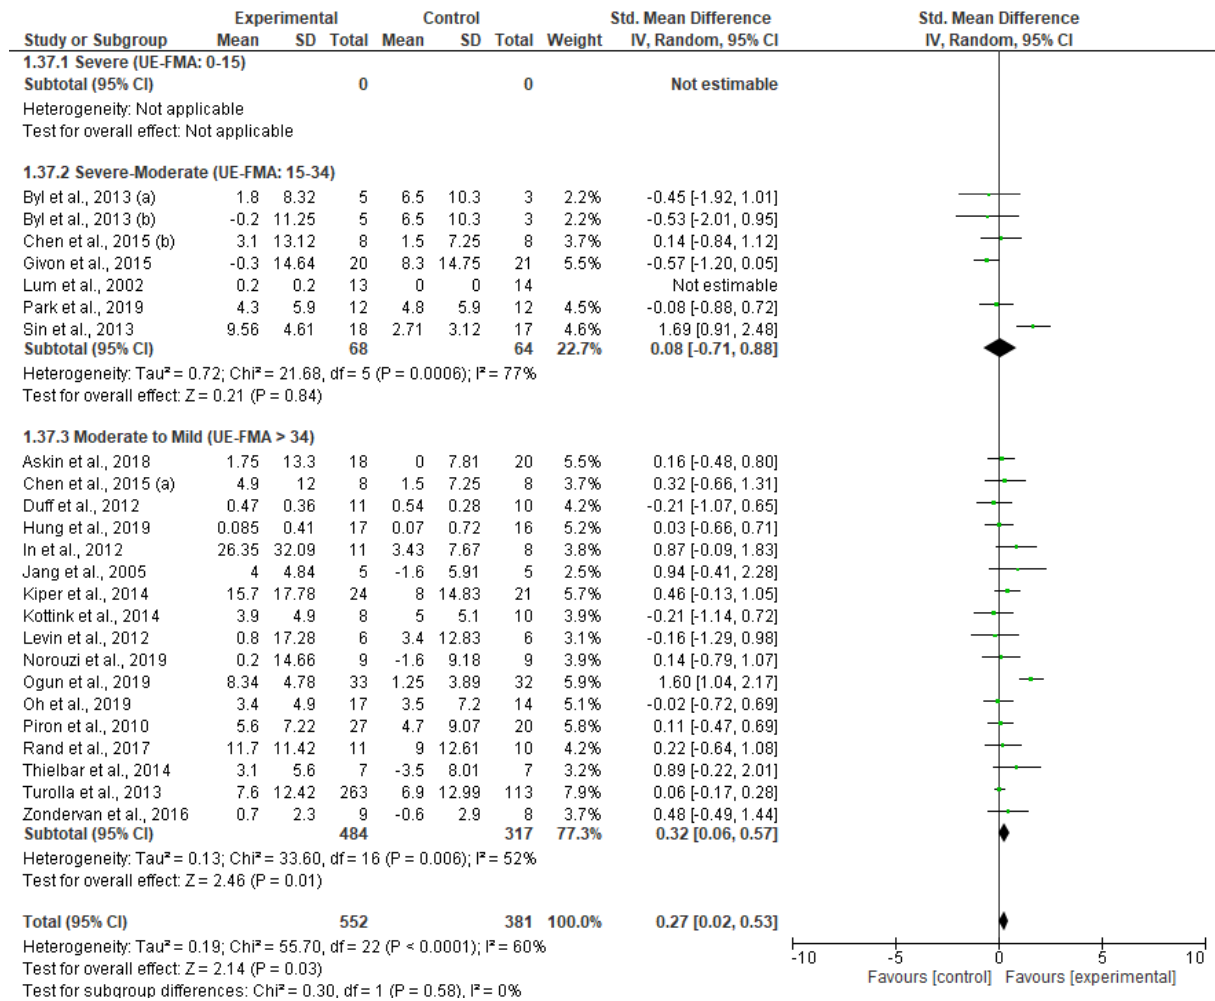

## Supplementary Table XLII.—Telerehabilitation.

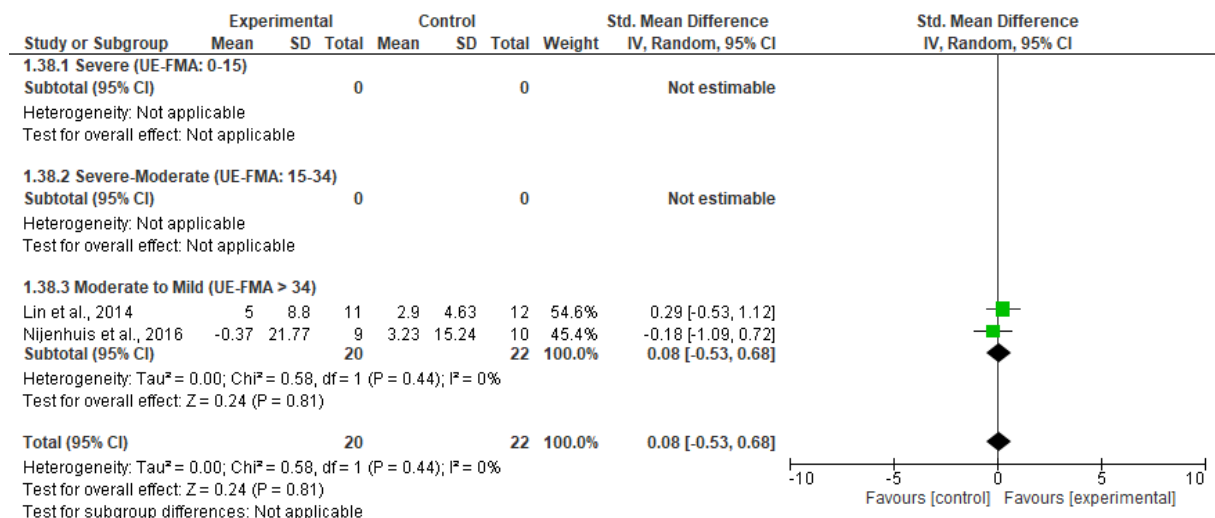



Supplementary Table XLIII.—Forest-plot regarding the effect of new-technologies on activity in patients with subacute stroke according to the treatment intensity – robot-assisted therapy.

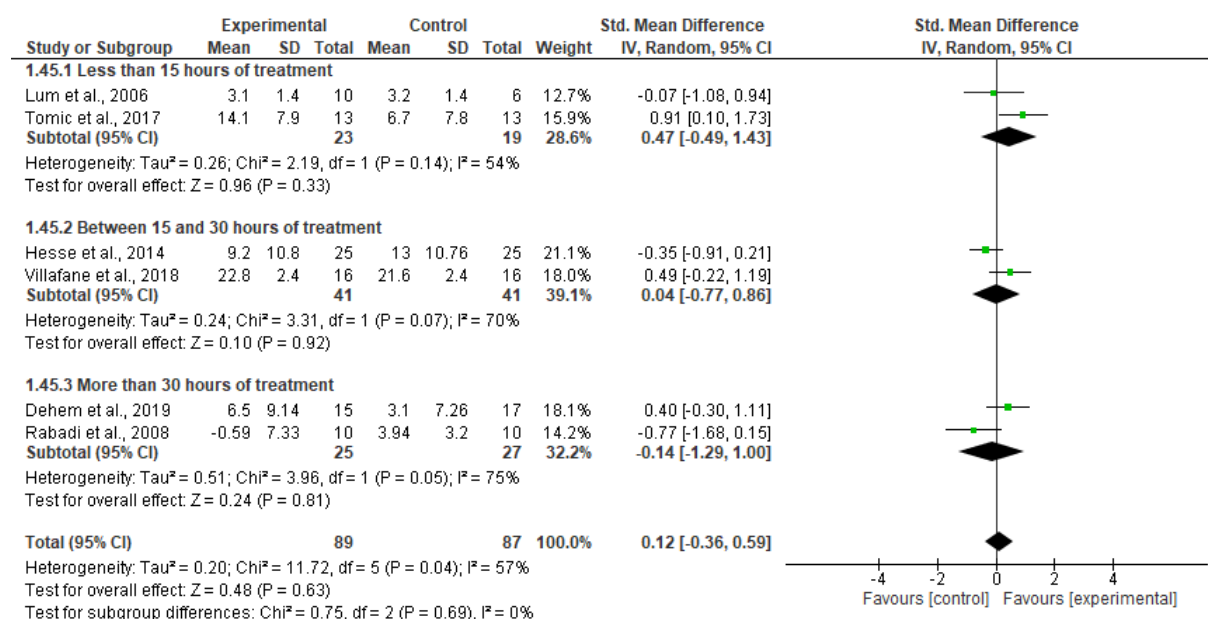

## Supplementary Table XLIV.—Virtual reality.

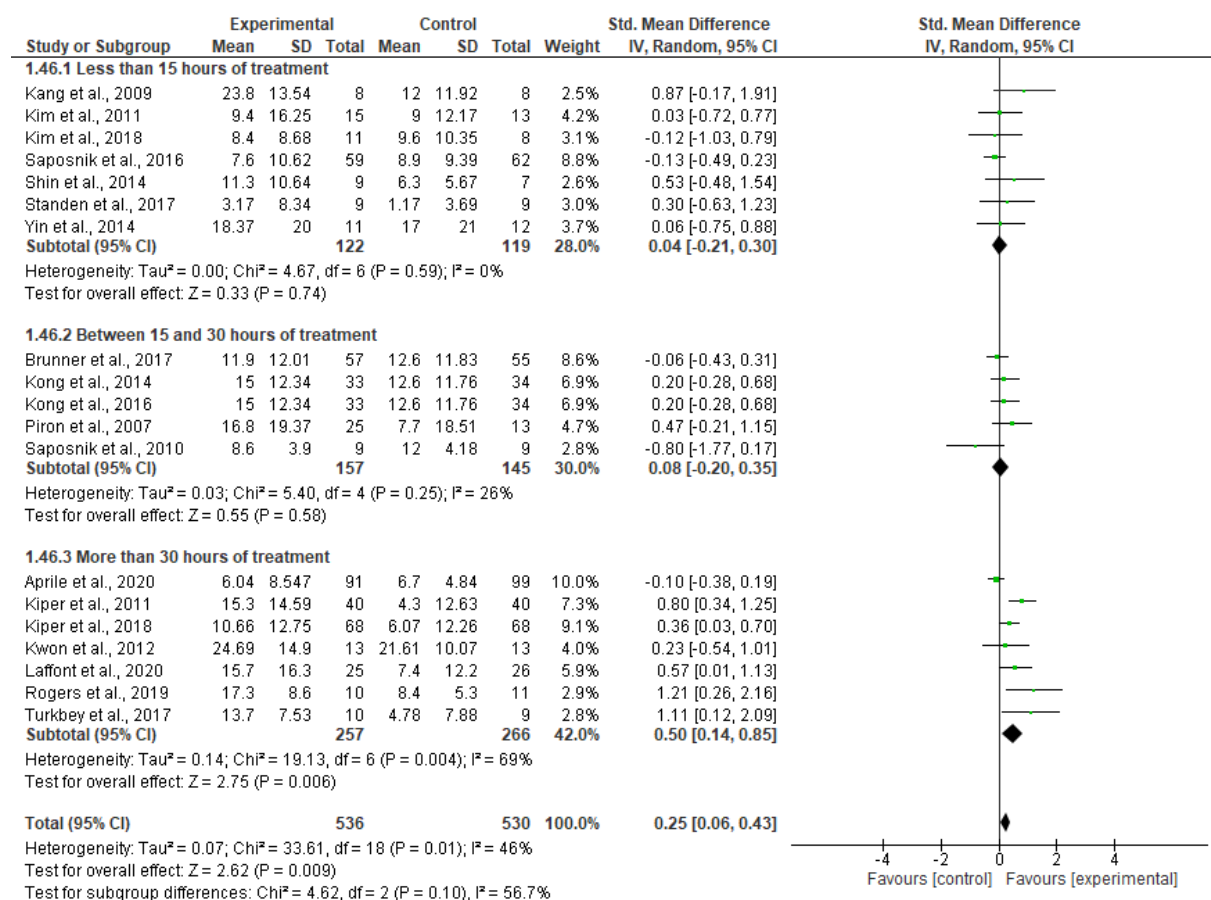

## Supplementary Table XLV.—Telerehabilitation.

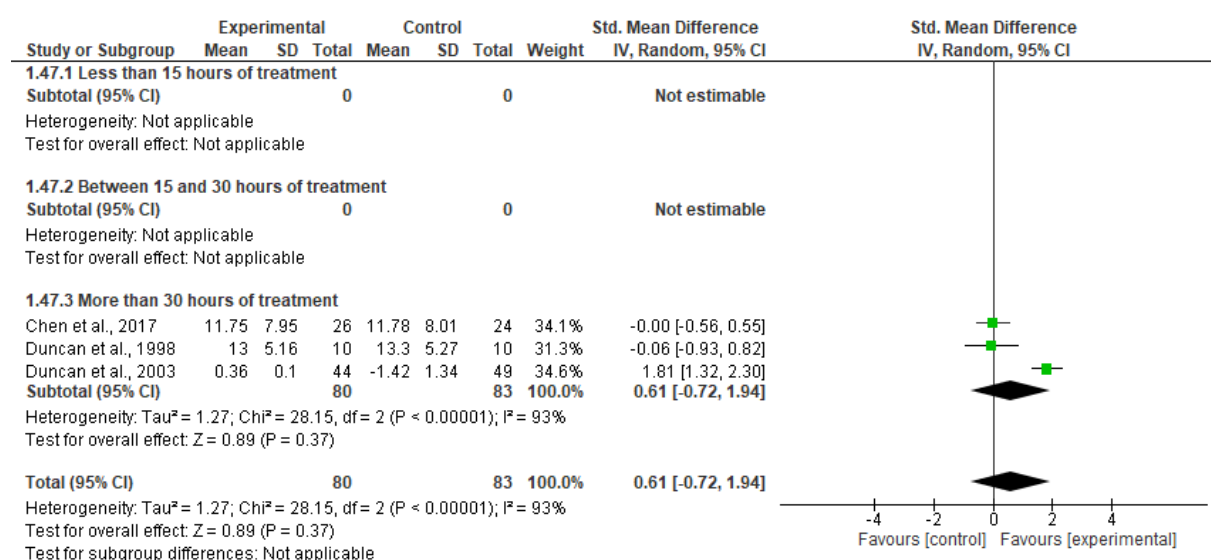

Supplementary Table XLVI.—Forest-plot regarding the effect of new-technologies on activity in patients with chronic stroke according to the treatment intensity - robot-assisted therapy.

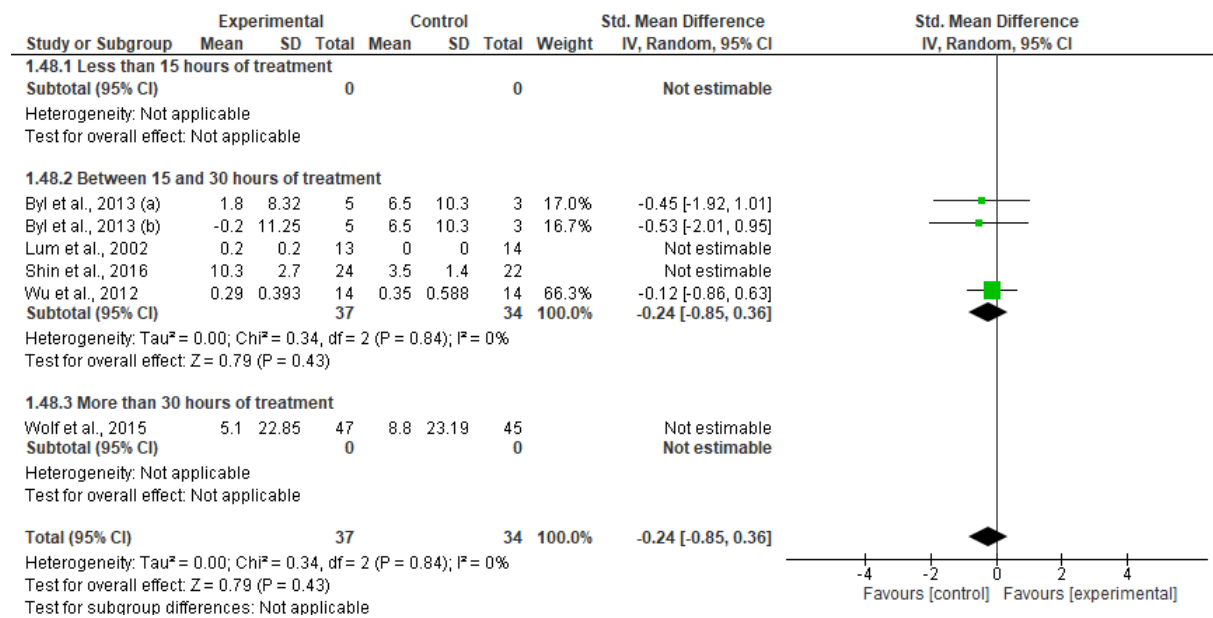

## Supplementary Table XLVII.—Virtual reality.

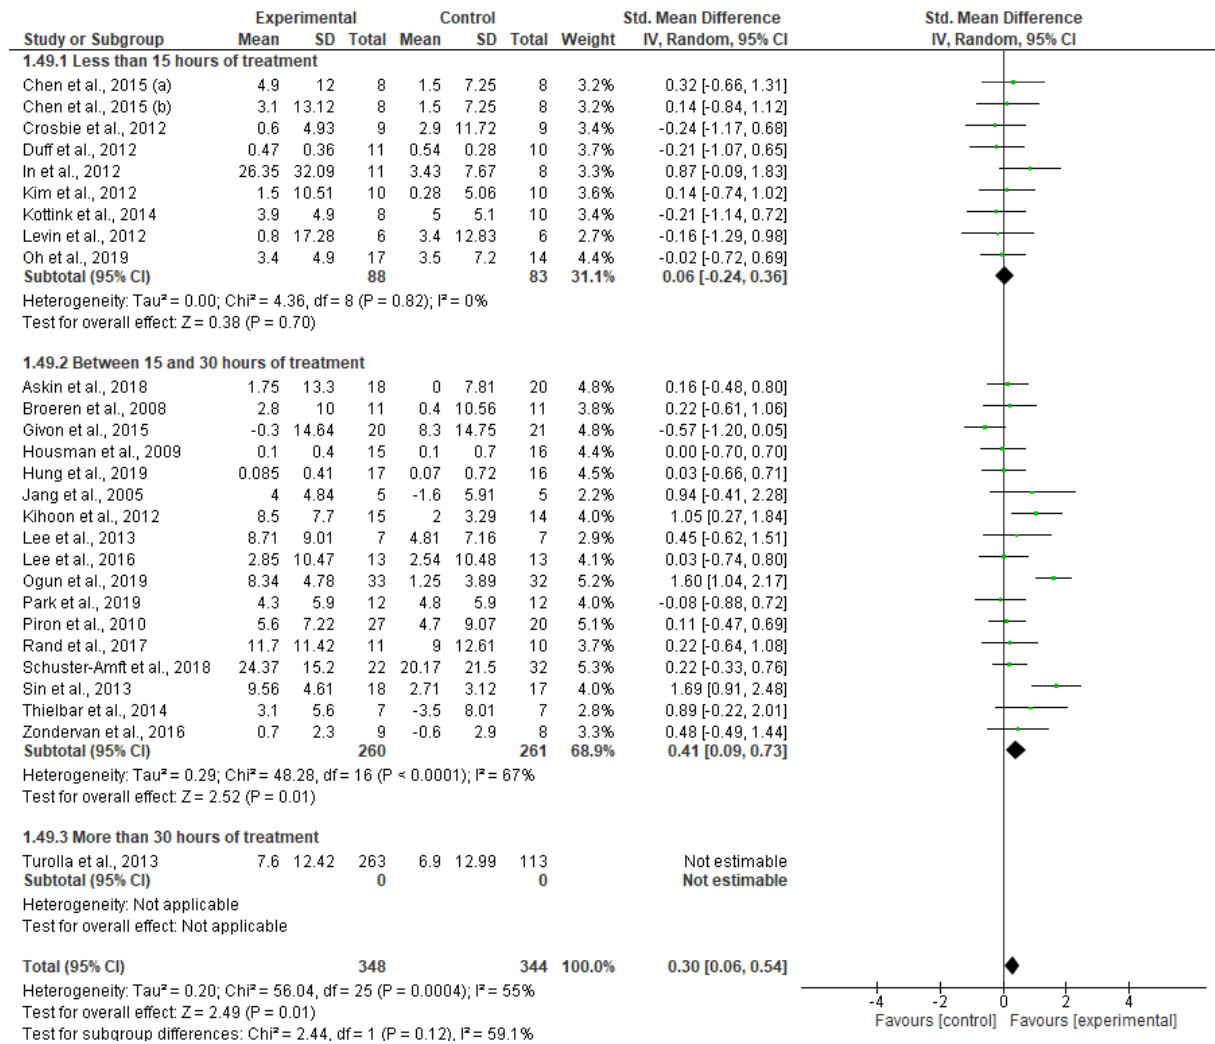

## Supplementary Table XLVIII.—Telerehabilitation.

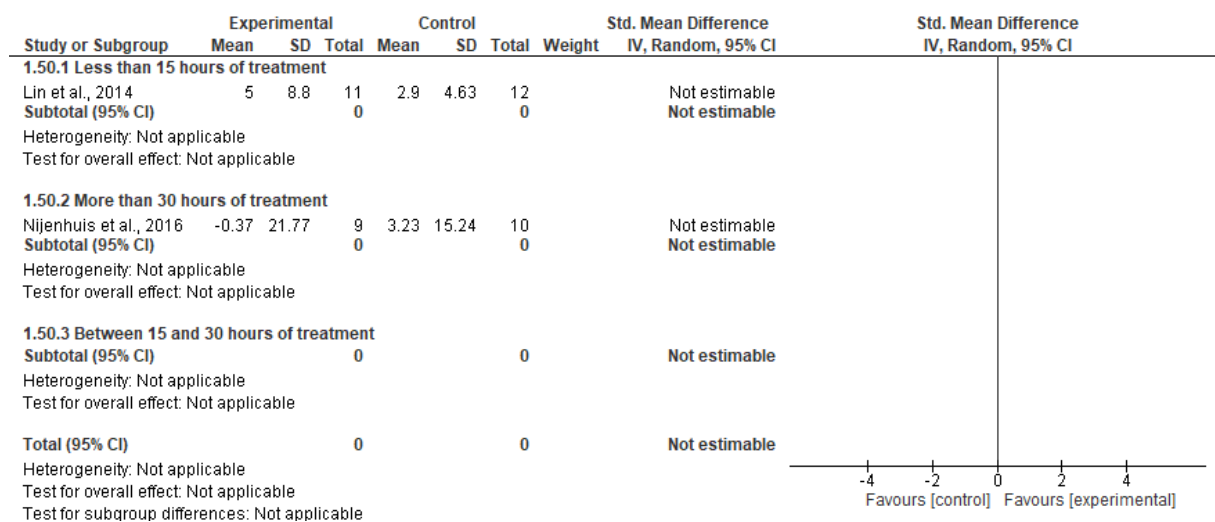

Supplement: Supplementary_Digital_Material8.pdf [file Supplementary_Digital_Material8.pdf]
