# Supplementary material for: New technologies promoting active upper limb rehabilitation after stroke: an overview and network meta-analysis
Source: PubMed Central journal article supplement — Eur J Phys Rehabil Med. 2022 Jun 6;58(4):530–48. doi: 10.23736/S1973-9087.22.07404-4 (PMC9980549; doi:10.23736/s1973-9087.22.07404-4), 2022-06-06
Supplement: Supplementary_Digital_Material3.pdf [file Supplementary_Digital_Material3.pdf]

SUPPLEMENTARY DIGITAL MATERIAL 3

Supplementary Table I.—AMSTAR assessment.

| Items                          | 1 | 2   | 3 | 4   | 5 | 6 | 7   | 8   | 9   | 10 | 11 | 12 | 13 | 14 | 15 | 16 | Confidence |
|--------------------------------|---|-----|---|-----|---|---|-----|-----|-----|----|----|----|----|----|----|----|------------|
| <b>Articles</b>                |   |     |   |     |   |   |     |     |     |    |    |    |    |    |    |    |            |
| Ahn et al. (2019)              | X | 0   | X | X/0 | X | X | X   | X/0 | X   | X  | X  | X  | X  | X  | X  | X  | M          |
| Al-Whaibi et al. (2021)        | X | 0   | X | X/0 | X | X | X   | X   | X   | 0  | X  | X  | X  | X  | X  | X  | L          |
| Aminov et al. (2018)           | X | X/0 | X | X/0 | X | X | X   | X   | X   | X  | X  | X  | X  | X  | X  | X  | H          |
| Bertani et al. (2017)          | X | 0   | X | X/0 | 0 | 0 | X   | 0   | X   | 0  | X  | 0  | 0  | X  | 0  | X  | L          |
| Chien et al. (2020)            | X | X/0 | X | X/0 | X | X | X   | X   | X   | X  | X  | 0  | X  | X  | 0  | X  | M          |
| Coupar et al. (2012)           | X | X   | X | X   | X | X | X   | X   | X   | X  | X  | X  | X  | X  | 0  | X  | H          |
| Da-Silva et al. (2018)         | 0 | X   | X | X/0 | X | X | X   | 0   | X   | X  | X  | X  | 0  | X  | X  | X  | L          |
| Dominguez-Téllez et al. (2020) | 0 | X/0 | X | X/0 | X | X | X   | 0   | X   | X  | X  | 0  | 0  | 0  | 0  | X  | L          |
| Doumas et al. (2021)           | X | X   | X | X   | X | X | X   | X   | X   | 0  | X  | X  | X  | X  | X  | X  | H          |
| Fang et al. (2022)             | X | 0   | X | X   | 0 | X | X   | X/0 | X   | 0  | X  | X  | X  | X  | X  | 0  | L          |
| Ferreira et al. (2018)         | X | X   | X | X/0 | 0 | 0 | X   | X   | X   | X  | X  | X  | X  | 0  | X  | X  | M          |
| Karamians et al. (2020)        | 0 | X   | 0 | X/0 | 0 | 0 | X   | 0   | X   | X  | X  | X  | X  | X  | 0  | X  | M          |
| Kwakkel et al. (2008)          | X | 0   | X | X   | 0 | 0 | 0   | X/0 | X   | 0  | X  | X  | X  | X  | 0  | 0  | M          |
| Laver et al. (2020)            | X | X   | X | X   | X | X | X   | X   | X   | X  | X  | X  | X  | X  | X  | X  | H          |
| Laver et al. (2017)            | X | X   | X | X   | X | X | X   | X   | X   | X  | X  | X  | X  | X  | X  | X  | H          |
| Lee et al. (2019)              | X | X/0 | X | X/0 | 0 | 0 | X   | X/0 | X   | 0  | X  | X  | X  | X  | X  | X  | H          |
| Li et al. (2021)               | X | 0   | X | X   | 0 | X | X/0 | X   | X   | X  | X  | 0  | X  | X  | X  | 0  | L          |
| Lo et al. (2017)               | X | X   | X | X/0 | 0 | 0 | X   | X/0 | X   | X  | X  | X  | X  | X  | X  | X  | M          |
| Lohse et al. (2014)            | X | X   | X | X/0 | X | X | X   | X/0 | X   | X  | X  | X  | 0  | X  | X  | X  | L          |
| Maier et al. (2019)            | X | X/0 | X | X/0 | X | X | X   | X/0 | X   | X  | X  | X  | X  | X  | X  | X  | H          |
| Mansour et al. (2021)          | 0 | 0   | X | X   | 0 | 0 | X   | X   | X   | 0  | X  | X  | X  | X  | X  | X  | L          |
| Mehrholz et al. (2020)         | X | X   | X | X   | X | X | X   | X/0 | X   | X  | X  | X  | X  | X  | 0  | X  | H          |
| Merkbib et al. (2020)          | X | X/0 | X | X/0 | 0 | X | X   | X/0 | X   | X  | X  | 0  | 0  | X  | 0  | X  | L          |
| Norouzi-Gheidari et al. (2012) | X | 0   | X | X/0 | X | 0 | X   | 0   | X   | X  | X  | 0  | X  | 0  | 0  | X  | M          |
| Peng et al. (2021)             | X | 0   | 0 | X   | X | X | X   | X/0 | X   | 0  | X  | X  | X  | X  | X  | 0  | L          |
| Prange et al. (2006)           | X | 0   | X | X/0 | X | X | X   | X/0 | X   | 0  | X  | X  | X  | 0  | 0  | X  | M          |
| Rintala et al. (2019)          | X | X   | X | X/0 | X | X | X   | X/0 | X   | 0  | X  | X  | X  | X  | X  | 0  | M          |
| Rozevink et al. (2021)         | X | X   | 0 | X   | X | X | X   | X   | X/0 | 0  | X  | X  | X  | 0  | 0  | X  | L          |
| Saposnik et al. (2011)         | 0 | 0   | 0 | X/0 | X | 0 | 0   | 0   | 0   | X  | X  | X  | 0  | X  | X  | 0  | CL         |
| Tchero et al. (2018)           | 0 | X/0 | X | X/0 | X | X | X   | X/0 | X   | 0  | X  | 0  | 0  | X  | X  | X  | L          |
| Veerbeek et al. (2017)         | X | 0   | X | X/0 | 0 | 0 | X   | X/0 | X   | X  | X  | 0  | 0  | X  | 0  | X  | L          |
| Zhang et al. (2017)            | X | X/0 | X | X/0 | X | 0 | 0   | X/0 | X   | 0  | 0  | X  | X  | 0  | 0  | X  | L          |
| Zhao et al. (2022)             | X | X   | X | X   | X | X | X   | X   | X   | X  | X  | X  | X  | X  | X  | X  | H          |

**Abbreviations:** CL: critically low, H: high, L: low, M: moderate, X: yes X/0: partially yes, 0: no
