# Supplementary material for: New technologies promoting active upper limb rehabilitation after stroke: an overview and network meta-analysis
Source: PubMed Central journal article supplement — Eur J Phys Rehabil Med. 2022 Jun 6;58(4):530–48. doi: 10.23736/S1973-9087.22.07404-4 (PMC9980549; doi:10.23736/s1973-9087.22.07404-4), 2022-06-06
Supplement: Supplementary_Digital_Material5.pdf [file Supplementary_Digital_Material5.pdf]

## SUPPLEMENTARY DIGITAL MATERIAL 5

### GRADE Approach regarding motor function outcome

#### Supplementary Table XI.—During subacute and chronic phase.

**Author(s):**  
**Question:** New Technologies compared to CT for post-stroke rehabilitation for post-stroke rehabilitation  
**Setting:**  
**Bibliography:** . New technologies for post-stroke rehabilitation. Cochrane Database of Systematic Reviews [Year], Issue [Issue].

| Certainty assessment                                      |                   |                      |                      |              |                             |                      | N <sub>s</sub> of patients |                                   | Effect            |                                                        | Certainty        | Importance |
|-----------------------------------------------------------|-------------------|----------------------|----------------------|--------------|-----------------------------|----------------------|----------------------------|-----------------------------------|-------------------|--------------------------------------------------------|------------------|------------|
| N <sub>s</sub> of studies                                 | Study design      | Risk of bias         | Inconsistency        | Indirectness | Imprecision                 | Other considerations | New Technologies           | CT for post-stroke rehabilitation | Relative (95% CI) | Absolute (95% CI)                                      |                  |            |
| <b>Motor Function - Subacute - Virtual reality</b>        |                   |                      |                      |              |                             |                      |                            |                                   |                   |                                                        |                  |            |
| 13                                                        | randomised trials | not serious          | serious <sup>a</sup> | not serious  | not serious                 | none                 | 379                        | 371                               | -                 | SMD <b>0.26 SD higher</b> (0.03 higher to 0.48 higher) | ⊕⊕⊕○<br>Moderate |            |
| <b>Motor Function - Subacute - Robot-assisted therapy</b> |                   |                      |                      |              |                             |                      |                            |                                   |                   |                                                        |                  |            |
| 17                                                        | randomised trials | not serious          | serious <sup>a</sup> | not serious  | not serious                 | none                 | 306                        | 308                               | -                 | SMD <b>0.42 SD higher</b> (0.14 higher to 0.71 higher) | ⊕⊕⊕○<br>Moderate |            |
| <b>Motor Function - Subacute - Telerehabilitation</b>     |                   |                      |                      |              |                             |                      |                            |                                   |                   |                                                        |                  |            |
| 5                                                         | randomised trials | serious <sup>b</sup> | serious <sup>a</sup> | not serious  | serious <sup>c</sup>        | strong association   | 65                         | 70                                | -                 | SMD <b>0.63 SD higher</b> (0.27 higher to 1 higher)    | ⊕⊕○○<br>Low      |            |
| <b>Motor Function - Chronic - Virtual reality</b>         |                   |                      |                      |              |                             |                      |                            |                                   |                   |                                                        |                  |            |
| 29                                                        | randomised trials | serious <sup>b</sup> | serious <sup>a</sup> | not serious  | not serious                 | none                 | 659                        | 495                               | -                 | SMD <b>0.45 SD higher</b> (0.28 higher to 0.62 higher) | ⊕⊕○○<br>Low      |            |
| <b>Motor Function - Chronic - Robot-assisted therapy</b>  |                   |                      |                      |              |                             |                      |                            |                                   |                   |                                                        |                  |            |
| 24                                                        | randomised trials | not serious          | serious <sup>a</sup> | not serious  | not serious                 | none                 | 275                        | 263                               | -                 | SMD <b>0.37 SD higher</b> (0.08 higher to 0.67 higher) | ⊕⊕⊕○<br>Moderate |            |
| <b>Motor Function - Chronic - Telerehabilitation</b>      |                   |                      |                      |              |                             |                      |                            |                                   |                   |                                                        |                  |            |
| 3                                                         | randomised trials | serious <sup>b</sup> | not serious          | not serious  | very serious <sup>c,d</sup> | none                 | 76                         | 77                                | -                 | SMD <b>0.08 SD lower</b> (0.4 lower to 0.23 higher)    | ⊕○○○<br>Very low |            |

CI: confidence interval; SMD: standardised mean difference

#### Explanations

- a. Consistency was downgraded because the heterogeneity was superior to 30%
- b. Risk of bias was considered as moderate according to the Cochrane Risk of Bias Tool
- c. Precision was downgraded because less than 400 observations were made
- d. Precision was downgraded because the resultant SMD overlapped between intervention and control therapy

Supplementary Table XII.—When provided in addition and in substitution to conventional therapy.

**Author(s):** New Technologies compared to CT for post-stroke rehabilitation for post-stroke rehabilitation  
**Question:** New Technologies compared to CT for post-stroke rehabilitation for post-stroke rehabilitation  
**Setting:** . New technologies for post-stroke rehabilitation. Cochrane Database of Systematic Reviews [Year], Issue [Issue].  
**Bibliography:** . New technologies for post-stroke rehabilitation. Cochrane Database of Systematic Reviews [Year], Issue [Issue].

| Certainty assessment                                                                   |                   |                      |                      |              |                             |                      | N <sub>e</sub> of patients |                                   | Effect            |                                                        | Certainty        | Importance |
|----------------------------------------------------------------------------------------|-------------------|----------------------|----------------------|--------------|-----------------------------|----------------------|----------------------------|-----------------------------------|-------------------|--------------------------------------------------------|------------------|------------|
| N <sub>e</sub> of studies                                                              | Study design      | Risk of bias         | Inconsistency        | Indirectness | Imprecision                 | Other considerations | New Technologies           | CT for post-stroke rehabilitation | Relative (95% CI) | Absolute (95% CI)                                      |                  |            |
| <b>Motor function - Virtual reality in addition to conventional therapy</b>            |                   |                      |                      |              |                             |                      |                            |                                   |                   |                                                        |                  |            |
| 25                                                                                     | randomised trials | serious <sup>b</sup> | serious <sup>a</sup> | not serious  | not serious                 | none                 | 766                        | 620                               | -                 | SMD <b>0.3 SD higher</b> (0.14 higher to 0.45 higher)  | ⊕⊕○○<br>Low      |            |
| <b>Motor function - Robot assisted therapy in addition to conventional therapy</b>     |                   |                      |                      |              |                             |                      |                            |                                   |                   |                                                        |                  |            |
| 14                                                                                     | randomised trials | not serious          | serious <sup>a</sup> | not serious  | serious <sup>c</sup>        | none                 | 165                        | 168                               | -                 | SMD <b>0.39 SD higher</b> (0.11 higher to 0.68 higher) | ⊕⊕○○<br>Low      |            |
| <b>Motor function - Virtual reality in substitution to conventional therapy</b>        |                   |                      |                      |              |                             |                      |                            |                                   |                   |                                                        |                  |            |
| 16                                                                                     | randomised trials | serious <sup>b</sup> | serious <sup>a</sup> | not serious  | not serious                 | none                 | 261                        | 245                               | -                 | SMD <b>0.58 SD higher</b> (0.3 higher to 0.85 higher)  | ⊕⊕○○<br>Low      |            |
| <b>Motor function - Robot assisted therapy in substitution to conventional therapy</b> |                   |                      |                      |              |                             |                      |                            |                                   |                   |                                                        |                  |            |
| 25                                                                                     | randomised trials | not serious          | serious <sup>a</sup> | not serious  | not serious                 | none                 | 361                        | 353                               | -                 | SMD <b>0.45 SD higher</b> (0.15 higher to 0.74 higher) | ⊕⊕⊕○<br>Moderate |            |
| <b>Motor function - Telerehabilitation in substitution to conventional therapy</b>     |                   |                      |                      |              |                             |                      |                            |                                   |                   |                                                        |                  |            |
| 5                                                                                      | randomised trials | not serious          | not serious          | not serious  | very serious <sup>c,d</sup> | none                 | 130                        | 135                               | -                 | SMD <b>0.18 SD higher</b> (0.15 lower to 0.5 higher)   | ⊕⊕○○<br>Low      |            |

CI: confidence interval; SMD: standardised mean difference

**Explanations**

- a. Consistency was downgraded because the heterogeneity was superior to 30%
- b. Risk of bias was considered as moderate according to the Cochrane Risk of Bias Tool
- c. Precision was downgraded because less than 400 observations were made
- d. Precision was downgraded because the resultant SMD overlapped between intervention and control therapy
