# Supplementary material for: New technologies promoting active upper limb rehabilitation after stroke: an overview and network meta-analysis
Source: PubMed Central journal article supplement — Eur J Phys Rehabil Med. 2022 Jun 6;58(4):530–48. doi: 10.23736/S1973-9087.22.07404-4 (PMC9980549; doi:10.23736/s1973-9087.22.07404-4), 2022-06-06
Supplement: Supplementary_Digital_Material7.pdf [file Supplementary_Digital_Material7.pdf]

## SUPPLEMENTARY DIGITAL MATERIAL 7

Supplementary Table XXX.—GRADE Approach regarding activity outcome during chronic and subacute phase.

**Author(s):** New Technologies compared to CT for post-stroke rehabilitation for post-stroke rehabilitation  
**Question:** New technologies for post-stroke rehabilitation. Cochrane Database of Systematic Reviews [Year], Issue [Issue].  
**Setting:** . New technologies for post-stroke rehabilitation. Cochrane Database of Systematic Reviews [Year], Issue [Issue].  
**Bibliography:** . New technologies for post-stroke rehabilitation. Cochrane Database of Systematic Reviews [Year], Issue [Issue].

| Certainty assessment                                |                   |                      |                      |              |                             |                      | N <sub>o</sub> of patients |                                   | Effect            |                                                        | Certainty        | Importance |
|-----------------------------------------------------|-------------------|----------------------|----------------------|--------------|-----------------------------|----------------------|----------------------------|-----------------------------------|-------------------|--------------------------------------------------------|------------------|------------|
| N <sub>o</sub> of studies                           | Study design      | Risk of bias         | Inconsistency        | Indirectness | Imprecision                 | Other considerations | New Technologies           | CT for post-stroke rehabilitation | Relative (95% CI) | Absolute (95% CI)                                      |                  |            |
| <b>Activity - Subacute - Virtual reality</b>        |                   |                      |                      |              |                             |                      |                            |                                   |                   |                                                        |                  |            |
| 21                                                  | randomised trials | not serious          | serious <sup>a</sup> | not serious  | not serious                 | none                 | 554                        | 548                               | -                 | SMD <b>0.25 SD higher</b> (0.07 higher to 0.44 higher) | ⊕⊕⊕○<br>Moderate |            |
| <b>Activity - Subacute - Robot-assisted therapy</b> |                   |                      |                      |              |                             |                      |                            |                                   |                   |                                                        |                  |            |
| 9                                                   | randomised trials | not serious          | serious <sup>a</sup> | not serious  | very serious <sup>c,d</sup> | none                 | 146                        | 141                               | -                 | SMD <b>0.36 SD higher</b> (0.13 lower to 0.85 higher)  | ⊕○○○<br>Very low |            |
| <b>Activity - Subacute - Telerehabilitation</b>     |                   |                      |                      |              |                             |                      |                            |                                   |                   |                                                        |                  |            |
| 2                                                   | randomised trials | not serious          | not serious          | not serious  | very serious <sup>c,d</sup> | none                 | 34                         | 29                                | -                 | SMD <b>0.06 SD lower</b> (0.55 lower to 0.44 higher)   | ⊕⊕○○<br>Low      |            |
| <b>Activity - Chronic - Virtual reality</b>         |                   |                      |                      |              |                             |                      |                            |                                   |                   |                                                        |                  |            |
| 29                                                  | randomised trials | serious <sup>b</sup> | not serious          | not serious  | serious <sup>d</sup>        | none                 | 603                        | 444                               | -                 | SMD <b>0.11 SD higher</b> (0.01 lower to 0.24 higher)  | ⊕⊕○○<br>Low      |            |
| <b>Activity - Chronic - Robot-assisted therapy</b>  |                   |                      |                      |              |                             |                      |                            |                                   |                   |                                                        |                  |            |
| 2                                                   | randomised trials | serious <sup>b</sup> | not serious          | not serious  | very serious <sup>c,d</sup> | none                 | 61                         | 59                                | -                 | SMD <b>0.15 SD lower</b> (0.51 lower to 0.21 higher)   | ⊕○○○<br>Very low |            |
| <b>Activity - Chronic - Telerehabilitation</b>      |                   |                      |                      |              |                             |                      |                            |                                   |                   |                                                        |                  |            |
| 3                                                   | randomised trials | not serious          | not serious          | not serious  | very serious <sup>c,d</sup> | none                 | 46                         | 46                                | -                 | SMD <b>0.04 SD higher</b> (0.37 lower to 0.45 higher)  | ⊕⊕○○<br>Low      |            |

CI: confidence interval; SMD: standardised mean difference

### Explanations

- a. Consistency was downgraded because the heterogeneity was superior to 30%
- b. Risk of bias was considered as moderate according to the Cochrane Risk of Bias Tool
- c. Precision was downgraded because less than 400 observations were made
- d. Precision was downgraded because the resultant SMD overlapped between intervention and control therapy

Supplementary Table XXXI.—GRADE Approach regarding activity outcome when provided in addition to or in substitution of conventional therapy.

**Author(s):**

**Question:** New Technologies compared to CT for post-stroke rehabilitation for post-stroke rehabilitation

**Setting:**

**Bibliography:** . New technologies for post-stroke rehabilitation. Cochrane Database of Systematic Reviews [Year], Issue [Issue].

| Certainty assessment                                                             |                   |                      |                           |              |                             |                      | N <sub>o</sub> of patients |                                   | Effect            |                                                              | Certainty        | Importance |
|----------------------------------------------------------------------------------|-------------------|----------------------|---------------------------|--------------|-----------------------------|----------------------|----------------------------|-----------------------------------|-------------------|--------------------------------------------------------------|------------------|------------|
| N <sub>o</sub> of studies                                                        | Study design      | Risk of bias         | Inconsistency             | Indirectness | Imprecision                 | Other considerations | New Technologies           | CT for post-stroke rehabilitation | Relative (95% CI) | Absolute (95% CI)                                            |                  |            |
| <b>Activity - Virtual reality in addition to conventional therapy</b>            |                   |                      |                           |              |                             |                      |                            |                                   |                   |                                                              |                  |            |
| 34                                                                               | randomised trials | serious <sup>b</sup> | serious <sup>a</sup>      | not serious  | not serious                 | none                 | 881                        | 730                               | -                 | SMD<br><b>0.28 SD higher</b><br>(0.13 higher to 0.44 higher) | ⊕⊕○○<br>Low      |            |
| <b>Activity - Robot assisted therapy in addition to conventional therapy</b>     |                   |                      |                           |              |                             |                      |                            |                                   |                   |                                                              |                  |            |
| 8                                                                                | randomised trials | not serious          | very serious <sup>e</sup> | not serious  | very serious <sup>c,d</sup> | none                 | 156                        | 153                               | -                 | SMD<br><b>0.34 SD higher</b><br>(0.18 lower to 0.86 higher)  | ⊕○○○<br>Very low |            |
| <b>Activity - Virtual reality in substitution of conventional therapy</b>        |                   |                      |                           |              |                             |                      |                            |                                   |                   |                                                              |                  |            |
| 18                                                                               | randomised trials | not serious          | not serious               | not serious  | serious <sup>d</sup>        | none                 | 310                        | 295                               | -                 | SMD<br><b>0.09 SD higher</b><br>(0.08 lower to 0.26 higher)  | ⊕⊕⊕○<br>Moderate |            |
| <b>Activity - Robot assisted therapy in substitution of conventional therapy</b> |                   |                      |                           |              |                             |                      |                            |                                   |                   |                                                              |                  |            |
| 2                                                                                | randomised trials | serious <sup>b</sup> | not serious               | not serious  | very serious <sup>c,d</sup> | none                 | 35                         | 31                                | -                 | SMD<br><b>0.28 SD lower</b><br>(0.77 lower to 0.21 higher)   | ⊕○○○<br>Very low |            |
| <b>Activity - Telerehabilitation in substitution of conventional therapy</b>     |                   |                      |                           |              |                             |                      |                            |                                   |                   |                                                              |                  |            |
| 3                                                                                | randomised trials | not serious          | not serious               | not serious  | very serious <sup>c,d</sup> | none                 | 45                         | 41                                | -                 | SMD<br><b>0.04 SD higher</b><br>(0.39 lower to 0.46 higher)  | ⊕⊕○○<br>Low      |            |

CI: confidence interval; SMD: standardised mean difference

**Explanations**

- a. Consistency was downgraded because the heterogeneity was superior to 30%
- b. Risk of bias was considered as moderate according to the Cochrane Risk of Bias Tool
- c. Precision was downgraded because less than 400 observations were made
- d. Precision was downgraded because the resultant SMD overlapped between intervention and control therapy
- e. Consistency was doubly downgraded because the heterogeneity was superior to 75%
